# Supplementary material for: What are small, medium and large effect sizes for exercise treatments of tendinopathy? A systematic review and meta-analysis
Source: BMJ Open Sport Exerc Med. 2023 Feb 27;9(1):e001389. doi: 10.1136/bmjsem-2022-001389 (PMC9972446; doi:10.1136/bmjsem-2022-001389)
Supplement: Supplementary data [file bmjsem-2022-001389supp002.csv]

NT	ID	Study.type	Tendinopathy.type	Outcome.Domain	Outcome.Tool	ExerciseHierarchy	ClassD	ClassAll	TreatmentD	TreatmentAll	N	AgeMean	AgeSD	PercentFemale	BMIMean	BMISd	Supervision	Location	Random.sequence.generation	Allocation.concealment	Blinding.of.participants.personnel	Blinding.of.outcome.assessment	Incomplete.outcome.bias	Selective.reporting	Other.bias	Time	TimeC	OutcomeLevel	MeasureLevel	ES	SEES
6	9. Balius et al 2016	RCT	Achilles	Disability	VISA-A	Exercise only	Resistance	Resistance	Eccentric Only	Eccentric Only	15	41.38	11.66	20.38	NA	NA	Unsupervised	Home	Low risk	Low risk	Unclear	Low risk	Low risk	Unclear	Low risk	6	Short	1000	1	0.735353535	0.254742291
6	9. Balius et al 2016	RCT	Achilles	Disability	VISA-A	Exercise only	Resistance	Resistance	Eccentric Only	Eccentric Only	15	41.38	11.66	20.38	NA	NA	Unsupervised	Home	Low risk	Low risk	Unclear	Low risk	Low risk	Unclear	Low risk	12	Short	1000	2	1.418181818	0.357668026
6	9. Balius et al 2016	RCT	Achilles	Pain	VAS- rest	Exercise only	Resistance	Resistance	Eccentric Only	Eccentric Only	15	41.38	11.66	20.38	NA	NA	Unsupervised	Home	Low risk	Low risk	Unclear	Low risk	Low risk	Unclear	Low risk	6	Short	1001	3	0.585281385	0.237483042
6	9. Balius et al 2016	RCT	Achilles	Pain	VAS- rest	Exercise only	Resistance	Resistance	Eccentric Only	Eccentric Only	15	41.38	11.66	20.38	NA	NA	Unsupervised	Home	Low risk	Low risk	Unclear	Low risk	Low risk	Unclear	Low risk	12	Short	1001	4	1.080519481	0.302919894
6	9. Balius et al 2016	RCT	Achilles	Pain	VAS- movement	Exercise only	Resistance	Resistance	Eccentric Only	Eccentric Only	15	41.38	11.66	20.38	NA	NA	Unsupervised	Home	Low risk	Low risk	Unclear	Low risk	Low risk	Unclear	Low risk	6	Short	1002	5	0.521630094	0.231036974
6	9. Balius et al 2016	RCT	Achilles	Pain	VAS- movement	Exercise only	Resistance	Resistance	Eccentric Only	Eccentric Only	15	41.38	11.66	20.38	NA	NA	Unsupervised	Home	Low risk	Low risk	Unclear	Low risk	Low risk	Unclear	Low risk	12	Short	1002	6	0.978056426	0.287609165
4	34. Hallgren et al 2014	RCT	Rotator cuff - subacromial impingement	Disability	Constant-Murley score	Exercise only	Resistance	Resistance	Eccentric only	Eccentric only, concentric and eccentric	41	52	30-65	37	NA	NA	Unsupervised	Home	High risk	Low risk	High risk	Low risk	Unclear	Low risk	Low risk	13.03572857	Medium	1003	7	1.962264151	0.256865242
4	34. Hallgren et al 2014	RCT	Rotator cuff - subacromial impingement	Disability	Constant-Murley score	Exercise only	Resistance	Resistance	Eccentric only	Eccentric only, concentric and eccentric	38	52	30-65	37	NA	NA	Unsupervised	Home	High risk	Low risk	High risk	Low risk	Unclear	Low risk	Low risk	52.14291429	Medium	1003	8	2.379008746	0.312588962
4	34. Hallgren et al 2014	RCT	Rotator cuff - subacromial impingement	Disability	DASH	Exercise only	Resistance	Resistance	Eccentric only	Eccentric only, concentric and eccentric	41	52	30-65	37	NA	NA	Unsupervised	Home	High risk	Low risk	High risk	Low risk	Unclear	Low risk	Low risk	13.03572857	Medium	1004	9	1.308176101	0.193810265
4	34. Hallgren et al 2014	RCT	Rotator cuff - subacromial impingement	Disability	DASH	Exercise only	Resistance	Resistance	Eccentric only	Eccentric only, concentric and eccentric	38	52	30-65	37	NA	NA	Unsupervised	Home	High risk	Low risk	High risk	Low risk	Unclear	Low risk	Low risk	52.14291429	Medium	1004	10	1.632653061	0.233437899
4	34. Hallgren et al 2014	RCT	Rotator cuff - subacromial impingement	QoL	EQ5D	Exercise only	Resistance	Resistance	Eccentric only	Eccentric only, concentric and eccentric	41	52	30-65	37	NA	NA	Unsupervised	Home	High risk	Low risk	High risk	Low risk	Unclear	Low risk	Low risk	13.03572857	Medium	1005	11	0.193462663	0.123797239
4	34. Hallgren et al 2014	RCT	Rotator cuff - subacromial impingement	QoL	EQ5D	Exercise only	Resistance	Resistance	Eccentric only	Eccentric only, concentric and eccentric	38	52	30-65	37	NA	NA	Unsupervised	Home	High risk	Low risk	High risk	Low risk	Unclear	Low risk	Low risk	52.14291429	Medium	1005	12	0.262144294	0.130419773
4	34. Hallgren et al 2014	RCT	Rotator cuff - subacromial impingement	QoL	EQ-VAS	Exercise only	Resistance	Resistance	Eccentric only	Eccentric only, concentric and eccentric	41	52	30-65	37	NA	NA	Unsupervised	Home	High risk	Low risk	High risk	Low risk	Unclear	Low risk	Low risk	13.03572857	Medium	1006	13	0.630727763	0.141821387
4	34. Hallgren et al 2014	RCT	Rotator cuff - subacromial impingement	QoL	EQ-VAS	Exercise only	Resistance	Resistance	Eccentric only	Eccentric only, concentric and eccentric	38	52	30-65	37	NA	NA	Unsupervised	Home	High risk	Low risk	High risk	Low risk	Unclear	Low risk	Low risk	52.14291429	Medium	1006	14	1.259475219	0.197267466
4	34. Hallgren et al 2014	RCT	Rotator cuff - subacromial impingement	Pain	VAS- rest	Exercise only	Resistance	Resistance	Eccentric only	Eccentric only, concentric and eccentric	41	52	30-65	37	NA	NA	Unsupervised	Home	High risk	Low risk	High risk	Low risk	Unclear	Low risk	Low risk	13.03572857	Medium	1007	15	0.441509434	0.131977579
4	34. Hallgren et al 2014	RCT	Rotator cuff - subacromial impingement	Pain	VAS- rest	Exercise only	Resistance	Resistance	Eccentric only	Eccentric only, concentric and eccentric	38	52	30-65	37	NA	NA	Unsupervised	Home	High risk	Low risk	High risk	Low risk	Unclear	Low risk	Low risk	52.14291429	Medium	1007	16	0.685714286	0.151011685
4	34. Hallgren et al 2014	RCT	Rotator cuff - subacromial impingement	Pain	VAS- activity	Exercise only	Resistance	Resistance	Eccentric only	Eccentric only, concentric and eccentric	41	52	30-65	37	NA	NA	Unsupervised	Home	High risk	Low risk	High risk	Low risk	Unclear	Low risk	Low risk	13.03572857	Medium	1008	17	2.109433962	0.271919397
4	34. Hallgren et al 2014	RCT	Rotator cuff - subacromial impingement	Pain	VAS- activity	Exercise only	Resistance	Resistance	Eccentric only	Eccentric only, concentric and eccentric	38	52	30-65	37	NA	NA	Unsupervised	Home	High risk	Low risk	High risk	Low risk	Unclear	Low risk	Low risk	52.14291429	Medium	1008	18	2.204081633	0.293495576
4	34. Hallgren et al 2014	RCT	Rotator cuff - subacromial impingement	Pain	VAS- night pain	Exercise only	Resistance	Resistance	Eccentric only	Eccentric only, concentric and eccentric	41	52	30-65	37	NA	NA	Unsupervised	Home	High risk	Low risk	High risk	Low risk	Unclear	Low risk	Low risk	13.03572857	Medium	1009	19	1.2517892	0.188798411
4	34. Hallgren et al 2014	RCT	Rotator cuff - subacromial impingement	Pain	VAS- night pain	Exercise only	Resistance	Resistance	Eccentric only	Eccentric only, concentric and eccentric	38	52	30-65	37	NA	NA	Unsupervised	Home	High risk	Low risk	High risk	Low risk	Unclear	Low risk	Low risk	52.14291429	Medium	1009	20	1.148486981	0.187234516
4	71. Pekyavas et al 2016	RCT	Rotator cuff - subacromial impingement	ROM - Shoulder	ROM- ext rotation	Multiple exercise types	Resistance	Flexibility, Resistance	Concentric and eccentric	concentric and eccentric, dynamic	15	47.1	13.8	NA	NA	NA	Supervised	Home	Low risk	Low risk	High risk	Low risk	Unclear	Unclear	Low risk	2	Short	1010	21	0.244145783	0.21040357
4	71. Pekyavas et al 2016	RCT	Rotator cuff - subacromial impingement	ROM - Shoulder	ROM- abduction	Multiple exercise types	Resistance	Flexibility, Resistance	Concentric and eccentric	concentric and eccentric, dynamic	15	47.1	13.8	NA	NA	NA	Supervised	Home	Low risk	Low risk	High risk	Low risk	Unclear	Unclear	Low risk	2	Short	1011	22	0.244342708	0.210413369
4	71. Pekyavas et al 2016	RCT	Rotator cuff - subacromial impingement	ROM - Shoulder	ROM- flexion	Multiple exercise types	Resistance	Flexibility, Resistance	Concentric and eccentric	concentric and eccentric, dynamic	15	47.1	13.8	NA	NA	NA	Supervised	Home	Low risk	Low risk	High risk	Low risk	Unclear	Unclear	Low risk	2	Short	1012	23	0.244792107	0.210435758
4	71. Pekyavas et al 2016	RCT	Rotator cuff - subacromial impingement	Disability	SPADI	Multiple exercise types	Resistance	Flexibility, Resistance	Concentric and eccentric	concentric and eccentric, dynamic	15	47.1	13.8	NA	NA	NA	Supervised	Home	Low risk	Low risk	High risk	Low risk	Unclear	Unclear	Low risk	2	Short	1013	24	0.330936623	0.215427798
4	71. Pekyavas et al 2016	RCT	Rotator cuff - subacromial impingement	Disability	SPADI- pain	Multiple exercise types	Resistance	Flexibility, Resistance	Concentric and eccentric	concentric and eccentric, dynamic	15	47.1	13.8	NA	NA	NA	Supervised	Home	Low risk	Low risk	High risk	Low risk	Unclear	Unclear	Low risk	2	Short	1014	25	5.2049414	1.096808314
4	71. Pekyavas et al 2016	RCT	Rotator cuff - subacromial impingement	Function	SPADI- disability	Multiple exercise types	Resistance	Flexibility, Resistance	Concentric and eccentric	concentric and eccentric, dynamic	15	47.1	13.8	NA	NA	NA	Supervised	Home	Low risk	Low risk	High risk	Low risk	Unclear	Unclear	Low risk	2	Short	1015	26	1.765066394	0.418639236
4	35. Hallgren et al 2017	RCT	Rotator cuff - subacromial impingement	Disability	DASH	Multiple exercise types	Resistance	Flexibility, Resistance	Concentric and eccentric	Concentric and eccentric, Eccentric only, Static	41	58	NA	34.06593407	NA	NA	Unsupervised	NA	Unclear	Unclear	Low risk	Low risk	Low risk	Low risk	Low risk	13.03572857	Medium	1016	27	1.308176101	0.193810265
4	35. Hallgren et al 2017	RCT	Rotator cuff - subacromial impingement	Disability	DASH	Multiple exercise types	Resistance	Flexibility, Resistance	Concentric and eccentric	Concentric and eccentric, Eccentric only, Static	41	58	NA	34.06593407	NA	NA	Unsupervised	NA	Unclear	Unclear	Low risk	Low risk	Low risk	Low risk	Low risk	52.14291429	Medium	1016	28	1.635220126	0.224388545
4	35. Hallgren et al 2017	RCT	Rotator cuff - subacromial impingement	Disability	DASH	Multiple exercise types	Resistance	Flexibility, Resistance	Concentric and eccentric	Concentric and eccentric, Eccentric only, Static	41	58	NA	34.06593407	NA	NA	Unsupervised	NA	Unclear	Unclear	Low risk	Low risk	Low risk	Low risk	Low risk	260.7145714	Long	1016	29	1.635220126	0.224388545
4	35. Hallgren et al 2017	RCT	Rotator cuff - subacromial impingement	Disability	Constant-murley score	Multiple exercise types	Resistance	Flexibility, Resistance	Concentric and eccentric	Concentric and eccentric, Eccentric only, Static	41	58	NA	34.06593407	NA	NA	Unsupervised	NA	Unclear	Unclear	Low risk	Low risk	Low risk	Low risk	Low risk	13.03572857	Medium	1017	30	1.962264151	0.256865242
4	35. Hallgren et al 2017	RCT	Rotator cuff - subacromial impingement	Disability	Constant-murley score	Multiple exercise types	Resistance	Flexibility, Resistance	Concentric and eccentric	Concentric and eccentric, Eccentric only, Static	41	58	NA	34.06593407	NA	NA	Unsupervised	NA	Unclear	Unclear	Low risk	Low risk	Low risk	Low risk	Low risk	52.14291429	Medium	1017	31	2.382749326	0.300417169
4	35. Hallgren et al 2017	RCT	Rotator cuff - subacromial impingement	Disability	Constant-murley score	Multiple exercise types	Resistance	Flexibility, Resistance	Concentric and eccentric	Concentric and eccentric, Eccentric only, Static	41	58	NA	34.06593407	NA	NA	Unsupervised	NA	Unclear	Unclear	Low risk	Low risk	Low risk	Low risk	Low risk	260.7145714	Long	1017	32	2.873315364	0.352850552
4	35. Hallgren et al 2017	RCT	Rotator cuff - subacromial impingement	QoL	EQ-5D	Multiple exercise types	Resistance	Flexibility, Resistance	Concentric and eccentric	Concentric and eccentric, Eccentric only, Static	41	58	NA	34.06593407	NA	NA	Unsupervised	NA	Unclear	Unclear	Low risk	Low risk	Low risk	Low risk	Low risk	13.03572857	Medium	1018	33	0.28032345	0.125985927
4	35. Hallgren et al 2017	RCT	Rotator cuff - subacromial impingement	QoL	EQ-5D	Multiple exercise types	Resistance	Flexibility, Resistance	Concentric and eccentric	Concentric and eccentric, Eccentric only, Static	41	58	NA	34.06593407	NA	NA	Unsupervised	NA	Unclear	Unclear	Low risk	Low risk	Low risk	Low risk	Low risk	52.14291429	Medium	1018	34	0.28032345	0.125985927
4	35. Hallgren et al 2017	RCT	Rotator cuff - subacromial impingement	QoL	EQ-5D	Multiple exercise types	Resistance	Flexibility, Resistance	Concentric and eccentric	Concentric and eccentric, Eccentric only, Static	41	58	NA	34.06593407	NA	NA	Unsupervised	NA	Unclear	Unclear	Low risk	Low risk	Low risk	Low risk	Low risk	260.7145714	Long	1018	35	0.28032345	0.125985927
4	35. Hallgren et al 2017	RCT	Rotator cuff - subacromial impingement	QoL	EQ-VAS	Multiple exercise types	Resistance	Flexibility, Resistance	Concentric and eccentric	Concentric and eccentric, Eccentric only, Static	41	58	NA	34.06593407	NA	NA	Unsupervised	NA	Unclear	Unclear	Low risk	Low risk	Low risk	Low risk	Low risk	13.03572857	Medium	1019	36	0.420485175	0.131062319
4	35. Hallgren et al 2017	RCT	Rotator cuff - subacromial impingement	QoL	EQ-VAS	Multiple exercise types	Resistance	Flexibility, Resistance	Concentric and eccentric	Concentric and eccentric, Eccentric only, Static	41	58	NA	34.06593407	NA	NA	Unsupervised	NA	Unclear	Unclear	Low risk	Low risk	Low risk	Low risk	Low risk	52.14291429	Medium	1019	37	1.261455526	0.189651176
4	35. Hallgren et al 2017	RCT	Rotator cuff - subacromial impingement	QoL	EQ-VAS	Multiple exercise types	Resistance	Flexibility, Resistance	Concentric and eccentric	Concentric and eccentric, Eccentric only, Static	41	58	NA	34.06593407	NA	NA	Unsupervised	NA	Unclear	Unclear	Low risk	Low risk	Low risk	Low risk	Low risk	260.7145714	Long	1019	38	1.051212938	0.171780163
4	35. Hallgren et al 2017	RCT	Rotator cuff - subacromial impingement	Pain	VAS- rest	Multiple exercise types	Resistance	Flexibility, Resistance	Concentric and eccentric	Concentric and eccentric, Eccentric only, Static	41	58	NA	34.06593407	NA	NA	Unsupervised	NA	Unclear	Unclear	Low risk	Low risk	Low risk	Low risk	Low risk	13.03572857	Medium	1020	39	0.441509434	0.131977579
4	35. Hallgren et al 2017	RCT	Rotator cuff - subacromial impingement	Pain	VAS- rest	Multiple exercise types	Resistance	Flexibility, Resistance	Concentric and eccentric	Concentric and eccentric, Eccentric only, Static	41	58	NA	34.06593407	NA	NA	Unsupervised	NA	Unclear	Unclear	Low risk	Low risk	Low risk	Low risk	Low risk	52.14291429	Medium	1020	40	0.686792453	0.145239712
4	35. Hallgren et al 2017	RCT	Rotator cuff - subacromial impingement	Pain	VAS- rest	Multiple exercise types	Resistance	Flexibility, Resistance	Concentric and eccentric	Concentric and eccentric, Eccentric only, Static	41	58	NA	34.06593407	NA	NA	Unsupervised	NA	Unclear	Unclear	Low risk	Low risk	Low risk	Low risk	Low risk	260.7145714	Long	1020	41	0.588679245	0.139399282
4	35. Hallgren et al 2017	RCT	Rotator cuff - subacromial impingement	Pain	VAS- activity	Multiple exercise types	Resistance	Flexibility, Resistance	Concentric and eccentric	Concentric and eccentric, Eccentric only, Static	41	58	NA	34.06593407	NA	NA	Unsupervised	NA	Unclear	Unclear	Low risk	Low risk	Low risk	Low risk	Low risk	13.03572857	Medium	1021	42	2.109433962	0.271919397
4	35. Hallgren et al 2017	RCT	Rotator cuff - subacromial impingement	Pain	VAS- activity	Multiple exercise types	Resistance	Flexibility, Resistance	Concentric and eccentric	Concentric and eccentric, Eccentric only, Static	41	58	NA	34.06593407	NA	NA	Unsupervised	NA	Unclear	Unclear	Low risk	Low risk	Low risk	Low risk	Low risk	52.14291429	Medium	1021	43	2.20754717	0.282075859
4	35. Hallgren et al 2017	RCT	Rotator cuff - subacromial impingement	Pain	VAS- activity	Multiple exercise types	Resistance	Flexibility, Resistance	Concentric and eccentric	Concentric and eccentric, Eccentric only, Static	41	58	NA	34.06593407	NA	NA	Unsupervised	NA	Unclear	Unclear	Low risk	Low risk	Low risk	Low risk	Low risk	260.7145714	Long	1021	44	2.501886792	0.313019524
4	35. Hallgren et al 2017	RCT	Rotator cuff - subacromial impingement	Pain	VAS- night pain	Multiple exercise types	Resistance	Flexibility, Resistance	Concentric and eccentric	Concentric and eccentric, Eccentric only, Static	41	58	NA	34.06593407	NA	NA	Unsupervised	NA	Unclear	Unclear	Low risk	Low risk	Low risk	Low risk	Low risk	13.03572857	Medium	1022	45	1.2517892	0.188798411
4	35. Hallgren et al 2017	RCT	Rotator cuff - subacromial impingement	Pain	VAS- night pain	Multiple exercise types	Resistance	Flexibility, Resistance	Concentric and eccentric	Concentric and eccentric, Eccentric only, Static	41	58	NA	34.06593407	NA	NA	Unsupervised	NA	Unclear	Unclear	Low risk	Low risk	Low risk	Low risk	Low risk	52.14291429	Medium	1022	46	1.150292778	0.180016874
4	35. Hallgren et al 2017	RCT	Rotator cuff - subacromial impingement	Pain	VAS- night pain	Multiple exercise types	Resistance	Flexibility, Resistance	Concentric and eccentric	Concentric and eccentric, Eccentric only, Static	41	58	NA	34.06593407	NA	NA	Unsupervised	NA	Unclear	Unclear	Low risk	Low risk	Low risk	Low risk	Low risk	260.7145714	Long	1022	47	1.2517892	0.188798411
4	75. Polimeni et al 2003	RCT	Rotator cuff - subacromial impingement	Disability	Constant-murley score	Exercise only	Flexibility	Flexibility	Dynamic	Dynamic	12	56	16	72	NA	NA	NA	NA	Unclear	Unclear	High risk	Low risk	Unclear	Unclear	Unclear	0.714285714	Short	1023	48	0.987195145	0.330217775
4	75. Polimeni et al 2003	RCT	Rotator cuff - subacromial impingement	Disability	Constant-murley score	Exercise only	Flexibility	Flexibility	Dynamic	Dynamic	12	56	16	72	NA	NA	NA	NA	Unclear	Unclear	High risk	Low risk	Unclear	Unclear	Unclear	1.428571429	Short	1023	49	1.314277874	0.390416562
4	75. Polimeni et al 2003	RCT	Rotator cuff - subacromial impingement	Disability	Constant-murley score	Exercise only	Flexibility	Flexibility	Dynamic	Dynamic	12	56	16	72	NA	NA	NA	NA	Unclear	Unclear	High risk	Low risk	Unclear	Unclear	Unclear	5.714285714	Short	1023	50	1.112081278	0.352352576
3	94. Stefansson et al 2019	RCT	Achilles	Disability	VISA-A	Exercise only	Resistance	Resistance	Eccentric only	Eccentric only	18	NA	NA	20	NA	NA	Unsupervised	Home	Low risk	Unclear	High risk	Low risk	High risk	Unclear	Low risk	4	Short	1024	51	4.776119403	0.901461737
3	81. Rompe et al 2007	RCT	Achilles	Disability	VISA-A	Multiple exercise types	Resistance	Flexibility, Resistance	Eccentric only	Eccentric only, static	25	48.5	10.6	61.3	NA	NA	Unsupervised	Home	Low risk	Low risk	Unclear	Low risk	Low risk	Unclear	Low risk	4	Short	1030	52	2.105263158	0.356265824
3	81. Rompe et al 2007	RCT	Achilles	Pain	NRS- loading	Multiple exercise types	Resistance	Flexibility, Resistance	Eccentric only	Eccentric only, static	25	48.5	10.6	61.3	NA	NA	Unsupervised	Home	Low risk	Low risk	Unclear	Low risk	Low risk	Unclear	Low risk	4	Short	1032	53	4.115789474	0.644840178
3	111. Yelland et al 2011	RCT	Achilles	Disability	VISA-A	Exercise only	Resistance	Resistance	Eccentric only	Eccentric only	15	46	NA	NA	NA	NA	Unsupervised	Home	Low risk	Low risk	High risk	Low risk	Low risk	Unclear	Low risk	6	Short	1033	54	0.699045348	0.250322206
3	111. Yelland et al 2011	RCT	Achilles	Disability	VISA-A	Exercise only	Resistance	Resistance	Eccentric only	Eccentric only	15	46	NA	NA	NA	NA	Unsupervised	Home	Low risk	Low risk	High risk	Low risk	Low risk	Unclear	Low risk	13.03572857	Medium	1033	55	1.206317193	0.322632638
3	111. Yelland et al 2011	RCT	Achilles	Disability	VISA-A	Exercise only	Resistance	Resistance	Eccentric only	Eccentric only	15	46	NA	NA	NA	NA	Unsupervised	Home	Low risk	Low risk	High risk	Low risk	Low risk	Unclear	Low risk	26.07145714	Medium	1033	56	1.026916175	0.294818917
3	111. Yelland et al 2011	RCT	Achilles	Disability	VISA-A	Exercise only	Resistance	Resistance	Eccentric only	Eccentric only	15	46	NA	NA	NA	NA	Unsupervised	Home	Low risk	Low risk	High risk	Low risk	Low risk	Unclear	Low risk	52.14291429	Medium	1033	57	1.31766955	0.340791888
3	111. Yelland et al 2011	RCT	Achilles	Pain	NRS- worst pain last week	Exercise only	Resistance	Resistance	Eccentric only	Eccentric only	15	46	NA	NA	NA	NA	Unsupervised	Home	Low risk	Low risk	High risk	Low risk	Low risk	Unclear	Low risk	6	Short	1034	58	0.43840121	0.223501831
3	111. Yelland et al 2011	RCT	Achilles	Pain	NRS- worst pain last week	Exercise only	Resistance	Resistance	Eccentric only	Eccentric only	15	46	NA	NA	NA	NA	Unsupervised	Home	Low risk	Low risk	High risk	Low risk	Low risk	Unclear	Low risk	13.03572857	Medium	1034	59	1.052162903	0.298610408
3	111. Yelland et al 2011	RCT	Achilles	Pain	NRS- worst pain last week	Exercise only	Resistance	Resistance	Eccentric only	Eccentric only	15	46	NA	NA	NA	NA	Unsupervised	Home	Low risk	Low risk	High risk	Low risk	Low risk	Unclear	Low risk	26.07145714	Medium	1034	60	0.935255914	0.28144055
3	111. Yelland et al 2011	RCT	Achilles	Pain	NRS- worst pain last week	Exercise only	Resistance	Resistance	Eccentric only	Eccentric only	15	46	NA	NA	NA	NA	Unsupervised	Home	Low risk	Low risk	High risk	Low risk	Low risk	Unclear	Low risk	52.14291429	Medium	1034	61	0.982018709	0.28818733
3	111. Yelland et al 2011	RCT	Achilles	Function	NRS- limitation of usual activities	Exercise only	Resistance	Resistance	Eccentric only	Eccentric only	15	46	NA	NA	NA	NA	Unsupervised	Home	Low risk	Low risk	High risk	Low risk	Low risk	Unclear	Low risk	6	Short	1035	62	0.267964798	0.211642455
3	111. Yelland et al 2011	RCT	Achilles	Function	NRS- limitation of usual activities	Exercise only	Resistance	Resistance	Eccentric only	Eccentric only	15	46	NA	NA	NA	NA	Unsupervised	Home	Low risk	Low risk	High risk	Low risk	Low risk	Unclear	Low risk	13.03572857	Medium	1035	63	1.016892057	0.293325761
3	111. Yelland et al 2011	RCT	Achilles	Function	NRS- limitation of usual activities	Exercise only	Resistance	Resistance	Eccentric only	Eccentric only	15	46	NA	NA	NA	NA	Unsupervised	Home	Low risk	Low risk	High risk	Low risk	Low risk	Unclear	Low risk	26.07145714	Medium	1035	64	1.078730087	0.302646398
3	111. Yelland et al 2011	RCT	Achilles	Function	NRS- limitation of usual activities	Exercise only	Resistance	Resistance	Eccentric only	Eccentric only	15	46	NA	NA	NA	NA	Unsupervised	Home	Low risk	Low risk	High risk	Low risk	Low risk	Unclear	Low risk	52.14291429	Medium	1035	65	1.216147933	0.324210785
3	67. Paavola et al 2018	RCT	Rotator cuff - subacromial impingement	Disability	Constant-murley score	Multiple exercise types	Proprioception	Flexibility, Proprioception, Resistance	Movement pattern retraining	Movement pattern retraining, Isometric, Dynamic, Concentric and eccentric,	68	50.5611399	4.955233161	69.8134715	NA	NA	Supervised	NA	Low risk	Low risk	Low risk	Low risk	Low risk	Low risk	Low risk	104.2858286	Long	1038	66	2.197253433	0.215036366
3	67. Paavola et al 2018	RCT	Rotator cuff - subacromial impingement	Disability	Simple shoulder test score	Multiple exercise types	Proprioception	Flexibility, Proprioception, Resistance	Movement pattern retraining	Movement pattern retraining, Isometric, Dynamic, Concentric and eccentric,	68	50.5611399	4.955233161	69.8134715	NA	NA	Supervised	NA	Low risk	Low risk	Low risk	Low risk	Low risk	Low risk	Low risk	104.2858286	Long	1039	67	1.794423637	0.183851561
3	67. Paavola et al 2018	RCT	Rotator cuff - subacromial impingement	QoL	15-D	Multiple exercise types	Proprioception	Flexibility, Proprioception, Resistance	Movement pattern retraining	Movement pattern retraining, Isometric, Dynamic, Concentric and eccentric,	68	50.5611399	4.955233161	69.8134715	NA	NA	Supervised	NA	Low risk	Low risk	Low risk	Low risk	Low risk	Low risk	Low risk	104.2858286	Long	1040	68	0.370786517	0.099776526
3	61. Melegati et al 2000	RCT	Rotator cuff - subacromial impingement	Disability	Constant-murley score	Multiple exercise types	Flexibility	Flexibility, Resistance	Dynamic	Dynamic, static, isometric, isokinetic	30	54.4	3	65.5	NA	NA	Unsupervised	Home	Unclear	Unclear	Unclear	Unclear	Unclear	Unclear	High risk	34.76194286	Medium	1041	69	1.911714704	0.298261435
3	93. Stasinopoulos et al 2017	RCT	Lateral elbow/tennis elbow	Pain	VAS- 24hr	Multiple exercise types	Resistance	Flexibility, Resistance	Eccentric only	Eccentric only, Static	11	43.7	4.6	55.8	NA	NA	Supervised	Clinic	Low risk	Unclear	Low risk	Low risk	Low risk	Unclear	High risk	4	Short	1042	70	5.922614803	1.530110428
3	93. Stasinopoulos et al 2017	RCT	Lateral elbow/tennis elbow	Pain	VAS- 24hr	Multiple exercise types	Resistance	Flexibility, Resistance	Eccentric only	Eccentric only, Static	11	43.7	4.6	55.8	NA	NA	Supervised	Clinic	Low risk	Unclear	Low risk	Low risk	Low risk	Unclear	High risk	8	Short	1042	71	6.234331372	1.608693001
3	93. Stasinopoulos et al 2017	RCT	Lateral elbow/tennis elbow	Function	VAS- function over 24hr	Multiple exercise types	Resistance	Flexibility, Resistance	Eccentric only	Eccentric only, Static	11	43.7	4.6	55.8	NA	NA	Supervised	Clinic	Low risk	Unclear	Low risk	Low risk	Low risk	Unclear	High risk	4	Short	1043	72	1.492956975	0.450747621
3	93. Stasinopoulos et al 2017	RCT	Lateral elbow/tennis elbow	Function	VAS- function over 24hr	Multiple exercise types	Resistance	Flexibility, Resistance	Eccentric only	Eccentric only, Static	11	43.7	4.6	55.8	NA	NA	Supervised	Clinic	Low risk	Unclear	Low risk	Low risk	Low risk	Unclear	High risk	8	Short	1043	73	1.780064086	0.514137938
3	112. Yerlikaya et al 2018	Quasi-experimental	Lateral elbow/tennis elbow	Pain	VAS- night pain	Multiple exercise types	Flexibility	Flexibility, Resistance	Dynamic	Dynamic, Static, Concentric and eccentric	30	48.6	8.8	71.1	NA	NA	Unsupervised	Home	Low risk	Unclear	Low risk	Low risk	Unclear	Unclear	High risk	4	Short	1045	74	1.406763285	0.239820026
3	112. Yerlikaya et al 2018	Quasi-experimental	Lateral elbow/tennis elbow	Pain	VAS- night pain	Multiple exercise types	Flexibility	Flexibility, Resistance	Dynamic	Dynamic, Static, Concentric and eccentric	30	48.6	8.8	71.1	NA	NA	Unsupervised	Home	Low risk	Unclear	Low risk	Low risk	Unclear	Unclear	High risk	8	Short	1045	75	1.80173913	0.285124363
3	112. Yerlikaya et al 2018	Quasi-experimental	Lateral elbow/tennis elbow	Pain	VAS- movement	Multiple exercise types	Flexibility	Flexibility, Resistance	Dynamic	Dynamic, Static, Concentric and eccentric	30	48.6	8.8	71.1	NA	NA	Unsupervised	Home	Low risk	Unclear	Low risk	Low risk	Unclear	Unclear	High risk	4	Short	1046	76	1.317647059	0.230124693
3	112. Yerlikaya et al 2018	Quasi-experimental	Lateral elbow/tennis elbow	Pain	VAS- movement	Multiple exercise types	Flexibility	Flexibility, Resistance	Dynamic	Dynamic, Static, Concentric and eccentric	30	48.6	8.8	71.1	NA	NA	Unsupervised	Home	Low risk	Unclear	Low risk	Low risk	Unclear	Unclear	High risk	8	Short	1046	77	1.661381074	0.268652205
3	84. Roos et al 2004	RCT	Achilles	Pain	FAOS- pain (100 best score)	Exercise only	Resistance	Resistance	Eccentric only	Eccentric only	16	45	26-60	52.3	NA	NA	Unsupervised	Home	Low risk	Unclear	Unclear	Low risk	Low risk	Unclear	Low risk	6	Short	1047	78	0.849241748	0.259732232
3	84. Roos et al 2004	RCT	Achilles	Pain	FAOS- pain (100 best score)	Exercise only	Resistance	Resistance	Eccentric only	Eccentric only	16	45	26-60	52.3	NA	NA	Unsupervised	Home	Low risk	Low risk	Unclear	Unclear	Low risk	Unclear	High risk	12	Short	1047	79	1.099018733	0.294410318
3	84. Roos et al 2004	RCT	Achilles	Pain	FAOS- pain (100 best score)	Exercise only	Resistance	Resistance	Eccentric only	Eccentric only	16	45	26-60	52.3	NA	NA	Unsupervised	Home	Low risk	Low risk	Unclear	Unclear	Low risk	Unclear	High risk	26	Medium	1047	80	1.198929527	0.309424837
3	84. Roos et al 2004	RCT	Achilles	Pain	FAOS- pain (100 best score)	Exercise only	Resistance	Resistance	Eccentric only	Eccentric only	16	45	26-60	52.3	NA	NA	Unsupervised	Home	Low risk	Low risk	Unclear	Unclear	Low risk	Unclear	High risk	52	Medium	1047	81	1.298840321	0.324959071
3	84. Roos et al 2004	RCT	Achilles	Function	FAOS- ADL	Exercise only	Resistance	Resistance	Eccentric only	Eccentric only	16	45	26-60	52.3	NA	NA	Unsupervised	Home	Low risk	Low risk	Unclear	Unclear	Low risk	Unclear	High risk	6	Short	1049	82	0.569491525	0.227569699
3	84. Roos et al 2004	RCT	Achilles	Function	FAOS- ADL	Exercise only	Resistance	Resistance	Eccentric only	Eccentric only	16	45	26-60	52.3	NA	NA	Unsupervised	Home	Low risk	Low risk	Unclear	Unclear	Low risk	Unclear	High risk	12	Short	1049	83	0.806779661	0.254330558
3	84. Roos et al 2004	RCT	Achilles	Function	FAOS- ADL	Exercise only	Resistance	Resistance	Eccentric only	Eccentric only	16	45	26-60	52.3	NA	NA	Unsupervised	Home	Low risk	Low risk	Unclear	Unclear	Low risk	Unclear	High risk	26	Medium	1049	84	0.711864407	0.24288264
3	84. Roos et al 2004	RCT	Achilles	Function	FAOS- ADL	Exercise only	Resistance	Resistance	Eccentric only	Eccentric only	16	45	26-60	52.3	NA	NA	Unsupervised	Home	Low risk	Low risk	Unclear	Unclear	Low risk	Unclear	High risk	52	Medium	1049	85	0.711864407	0.24288264
3	84. Roos et al 2004	RCT	Achilles	QoL	FAOS- QoL	Exercise only	Resistance	Resistance	Eccentric only	Eccentric only	16	45	26-60	52.3	NA	NA	Unsupervised	Home	Low risk	Low risk	Unclear	Unclear	Low risk	Unclear	High risk	6	Short	1051	86	0.725822532	0.244508529
3	84. Roos et al 2004	RCT	Achilles	QoL	FAOS- QoL	Exercise only	Resistance	Resistance	Eccentric only	Eccentric only	16	45	26-60	52.3	NA	NA	Unsupervised	Home	Low risk	Low risk	Unclear	Unclear	Low risk	Unclear	High risk	12	Short	1051	87	1.228315055	0.313943185
3	84. Roos et al 2004	RCT	Achilles	QoL	FAOS- QoL	Exercise only	Resistance	Resistance	Eccentric only	Eccentric only	16	45	26-60	52.3	NA	NA	Unsupervised	Home	Low risk	Low risk	Unclear	Unclear	Low risk	Unclear	High risk	26	Medium	1051	88	1.56331007	0.36808933
3	84. Roos et al 2004	RCT	Achilles	QoL	FAOS- QoL	Exercise only	Resistance	Resistance	Eccentric only	Eccentric only	16	45	26-60	52.3	NA	NA	Unsupervised	Home	Low risk	Low risk	Unclear	Unclear	Low risk	Unclear	High risk	52	Medium	1051	89	1.78664008	0.406242907
3	58. Martinez-Silvestrini et al 2005	Quasi-experimental	Lateral elbow/tennis elbow	Physical function capacity	Dynamometer- painfree grip strength	Multiple exercise types	Resistance	Flexibility, Resistance	Concentric only	Concentric Only, Static	26	45.5	7.7	46.8	NA	NA	Unsupervised	NA	Unclear	Unclear	Unclear	Unclear	Low risk	Unclear	High risk	6	Short	1052	90	0.799750078	0.194185053
3	58. Martinez-Silvestrini et al 2005	Quasi-experimental	Lateral elbow/tennis elbow	Pain	VAS- pain	Multiple exercise types	Resistance	Flexibility, Resistance	Concentric only	Concentric Only, Static	26	45.5	7.7	46.8	NA	NA	Unsupervised	NA	Unclear	Unclear	Unclear	Unclear	Low risk	Unclear	High risk	6	Short	1053	91	0.646464646	0.181144677
3	58. Martinez-Silvestrini et al 2005	Quasi-experimental	Lateral elbow/tennis elbow	Disability	Patient rated forearm evaluation questionnaire	Multiple exercise types	Resistance	Flexibility, Resistance	Concentric only	Concentric Only, Static	26	45.5	7.7	46.8	NA	NA	Unsupervised	NA	Unclear	Unclear	Unclear	Unclear	Low risk	Unclear	High risk	6	Short	1054	92	1.426024955	0.261694636
3	58. Martinez-Silvestrini et al 2005	Quasi-experimental	Lateral elbow/tennis elbow	Function	DASH function	Multiple exercise types	Resistance	Flexibility, Resistance	Concentric only	Concentric Only, Static	26	45.5	7.7	46.8	NA	NA	Unsupervised	NA	Unclear	Unclear	Unclear	Unclear	Low risk	Unclear	High risk	6	Short	1055	93	0.671328671	0.183130582
3	72. Petersen et al 2007	RCT	Achilles	Disability	AOFAS	Exercise only	Resistance	Resistance	Eccentric only	Eccentric Only	32	42.5	11.07	40	25.3	3.97	Unsupervised	Home	Low risk	Unclear	Unclear	Unclear	Unclear	Unclear	High risk	6	Short	1056	94	0.467544014	0.151305382
3	72. Petersen et al 2007	RCT	Achilles	Disability	AOFAS	Exercise only	Resistance	Resistance	Eccentric only	Eccentric Only	32	42.5	11.07	40	25.3	3.97	Unsupervised	Home	Low risk	Unclear	Unclear	Unclear	Unclear	Unclear	High risk	12	Short	1056	95	0.845043207	0.177603936
3	72. Petersen et al 2007	RCT	Achilles	Disability	AOFAS	Exercise only	Resistance	Resistance	Eccentric only	Eccentric Only	30	42.5	11.07	40	25.3	3.97	Unsupervised	Home	Low risk	Unclear	Unclear	Unclear	Low risk	Unclear	High risk	54	Long	1056	96	0.689333915	0.171151256
3	72. Petersen et al 2007	RCT	Achilles	Pain	VAS- pain in ADL	Exercise only	Resistance	Resistance	Eccentric only	Eccentric Only	32	42.5	11.07	40	25.3	3.97	Unsupervised	Home	Low risk	Unclear	Unclear	Unclear	Unclear	Unclear	High risk	6	Short	1057	97	0.079820391	0.138522694
3	72. Petersen et al 2007	RCT	Achilles	Pain	VAS- pain in ADL	Exercise only	Resistance	Resistance	Eccentric only	Eccentric Only	32	42.5	11.07	40	25.3	3.97	Unsupervised	Home	Low risk	Unclear	Unclear	Unclear	Unclear	Unclear	High risk	12	Short	1057	98	0.439013046	0.149805875
3	72. Petersen et al 2007	RCT	Achilles	Pain	VAS- pain in ADL	Exercise only	Resistance	Resistance	Eccentric only	Eccentric Only	30	42.5	11.07	40	25.3	3.97	Unsupervised	Home	Low risk	Unclear	Unclear	Unclear	Low risk	Unclear	High risk	54	Long	1057	99	0.218452763	0.145845427
3	72. Petersen et al 2007	RCT	Achilles	Pain	VAS- pain during sports activity	Exercise only	Resistance	Resistance	Eccentric only	Eccentric Only	32	42.5	11.07	40	25.3	3.97	Unsupervised	Home	Low risk	Unclear	Unclear	Unclear	Unclear	Unclear	High risk	6	Short	1058	100	0.763616698	0.171045429
3	72. Petersen et al 2007	RCT	Achilles	Pain	VAS- pain during sports activity	Exercise only	Resistance	Resistance	Eccentric only	Eccentric Only	32	42.5	11.07	40	25.3	3.97	Unsupervised	Home	Low risk	Unclear	Unclear	Unclear	Unclear	Unclear	High risk	12	Short	1058	101	1.08023848	0.198614909
3	72. Petersen et al 2007	RCT	Achilles	Pain	VAS- pain during sports activity	Exercise only	Resistance	Resistance	Eccentric only	Eccentric Only	30	42.5	11.07	40	25.3	3.97	Unsupervised	Home	Low risk	Unclear	Unclear	Unclear	Low risk	Unclear	High risk	54	Long	1058	102	0.973109255	0.195309959
3	72. Petersen et al 2007	RCT	Achilles	Pain	VAS- pain during gait activity	Exercise only	Resistance	Resistance	Eccentric only	Eccentric Only	32	42.5	11.07	40	25.3	3.97	Unsupervised	Home	Low risk	Unclear	Unclear	Unclear	Unclear	Unclear	High risk	6	Short	1059	103	0.136193744	0.139287887
3	72. Petersen et al 2007	RCT	Achilles	Pain	VAS- pain during gait activity	Exercise only	Resistance	Resistance	Eccentric only	Eccentric Only	32	42.5	11.07	40	25.3	3.97	Unsupervised	Home	Low risk	Unclear	Unclear	Unclear	Unclear	Unclear	High risk	12	Short	1059	104	0.460963585	0.150952503
3	72. Petersen et al 2007	RCT	Achilles	Pain	VAS- pain during gait activity	Exercise only	Resistance	Resistance	Eccentric only	Eccentric Only	30	42.5	11.07	40	25.3	3.97	Unsupervised	Home	Low risk	Unclear	Unclear	Unclear	Low risk	Unclear	High risk	54	Long	1059	105	0.385768194	0.152210655
3	72. Petersen et al 2007	RCT	Achilles	Function	SF-36 Physical functioning	Exercise only	Resistance	Resistance	Eccentric only	Eccentric Only	32	42.5	11.07	40	25.3	3.97	Unsupervised	Home	Low risk	Unclear	Unclear	Unclear	Unclear	Unclear	High risk	6	Short	1060	106	0.401987353	0.147980473
3	72. Petersen et al 2007	RCT	Achilles	Function	SF-36 Physical functioning	Exercise only	Resistance	Resistance	Eccentric only	Eccentric Only	32	42.5	11.07	40	25.3	3.97	Unsupervised	Home	Low risk	Unclear	Unclear	Unclear	Unclear	Unclear	High risk	12	Short	1060	107	0.523938573	0.15449725
3	72. Petersen et al 2007	RCT	Achilles	Disability	SF-36 Bodily pain	Exercise only	Resistance	Resistance	Eccentric only	Eccentric Only	32	42.5	11.07	40	25.3	3.97	Unsupervised	Home	Low risk	Unclear	Unclear	Unclear	Low risk	Unclear	High risk	6	Short	1062	108	0.468897712	0.151378492
3	72. Petersen et al 2007	RCT	Achilles	Disability	SF-36 Bodily pain	Exercise only	Resistance	Resistance	Eccentric only	Eccentric Only	32	42.5	11.07	40	25.3	3.97	Unsupervised	Home	Low risk	Unclear	Unclear	Unclear	Unclear	Unclear	High risk	12	Short	1062	109	0.506712044	0.153490923
3	98. Tahran et al 2020	RCT	Rotator cuff - subacromial impingement	Pain	VAS- rest	Exercise only	Flexibility	Flexibility	Static	Static	22	52.9	11	30.5	28.3	4.8	Supervised	Clinic	Low risk	Unclear	Low risk	Low risk	Low risk	Unclear	Low risk	4	Short	1064	110	0.649127121	0.1982425
3	98. Tahran et al 2020	RCT	Rotator cuff - subacromial impingement	Pain	VAS- activity	Exercise only	Flexibility	Flexibility	Static	Static	22	52.9	11	30.5	28.3	4.8	Supervised	Clinic	Low risk	Unclear	Low risk	Low risk	Low risk	Unclear	Low risk	4	Short	1065	111	2.590843373	0.456021434
3	98. Tahran et al 2020	RCT	Rotator cuff - subacromial impingement	ROM - Shoulder	ROM- int rotation	Exercise only	Flexibility	Flexibility	Static	Static	22	52.9	11	30.5	28.3	4.8	Supervised	Clinic	Low risk	Unclear	Low risk	Low risk	Low risk	Unclear	Low risk	4	Short	1066	112	2.054258495	0.375679953
3	98. Tahran et al 2020	RCT	Rotator cuff - subacromial impingement	ROM - Shoulder	ROM- ext rotation	Exercise only	Flexibility	Flexibility	Static	Static	22	52.9	11	30.5	28.3	4.8	Supervised	Clinic	Low risk	Unclear	Low risk	Low risk	Low risk	Unclear	Low risk	4	Short	1067	113	0.446610871	0.182622946
3	98. Tahran et al 2020	RCT	Rotator cuff - subacromial impingement	Physical function capacity	ROM- total rotation	Exercise only	Flexibility	Flexibility	Static	Static	22	52.9	11	30.5	28.3	4.8	Supervised	Clinic	Low risk	Unclear	Low risk	Low risk	Low risk	Unclear	Low risk	4	Short	1068	114	1.043864173	0.239198429
3	98. Tahran et al 2020	RCT	Rotator cuff - subacromial impingement	Disability	Constant-murley score	Exercise only	Flexibility	Flexibility	Static	Static	22	52.9	11	30.5	28.3	4.8	Supervised	Clinic	Low risk	Unclear	Low risk	Low risk	Low risk	Unclear	Low risk	4	Short	1069	115	1.094766116	0.24522292
3	98. Tahran et al 2020	RCT	Rotator cuff - subacromial impingement	Disability	QuickDASH	Exercise only	Flexibility	Flexibility	Static	Static	22	52.9	11	30.5	28.3	4.8	Supervised	Clinic	Low risk	Unclear	Low risk	Low risk	Low risk	Unclear	Low risk	4	Short	1070	116	1.296390505	0.27029448
3	36. Heron et al 2017	RCT	Rotator cuff - subacromial impingement	Disability	SPADI	Multiple exercise types	Resistance	Flexibility, Resistance	Concentric and eccentric	Concentric and eccentric, Static	40	49.9	NA	41	NA	NA	Unsupervised	NA	Low risk	Low risk	Low risk	Low risk	High risk	High risk	Low risk	26.07145714	Medium	1071	117	0.358688634	0.130232364
3	106. Walther et al 2004	RCT	Rotator cuff - subacromial impingement	Pain	VAS- rest	Multiple exercise types	Resistance	Flexibility, Resistance	Isometric	Concentric and eccentric, Isometric, Static, Dynamic	20	50.73333333	NA	43.33333333	NA	NA	Unsupervised	NA	Unclear	Unclear	Unclear	Unclear	Low risk	Unclear	Unclear	6	Short	1072	118	0.557888282	0.200612086
3	106. Walther et al 2004	RCT	Rotator cuff - subacromial impingement	Pain	VAS- rest	Multiple exercise types	Resistance	Flexibility, Resistance	Isometric	Concentric and eccentric, Isometric, Static, Dynamic	20	50.73333333	NA	43.33333333	NA	NA	Unsupervised	NA	Unclear	Unclear	Unclear	Unclear	Low risk	Unclear	Unclear	12	Short	1072	119	1.115776564	0.261301969
3	106. Walther et al 2004	RCT	Rotator cuff - subacromial impingement	Pain	VAS- loading	Multiple exercise types	Resistance	Flexibility, Resistance	Isometric	Concentric and eccentric, Isometric, Static, Dynamic	20	50.73333333	NA	43.33333333	NA	NA	Unsupervised	NA	Unclear	Unclear	Unclear	Unclear	Low risk	Unclear	Unclear	6	Short	1073	120	0.836913161	0.227881319
3	106. Walther et al 2004	RCT	Rotator cuff - subacromial impingement	Pain	VAS- loading	Multiple exercise types	Resistance	Flexibility, Resistance	Isometric	Concentric and eccentric, Isometric, Static, Dynamic	20	50.73333333	NA	43.33333333	NA	NA	Unsupervised	NA	Unclear	Unclear	Unclear	Unclear	Low risk	Unclear	Unclear	12	Short	1073	121	2.083625181	0.401556566
3	106. Walther et al 2004	RCT	Rotator cuff - subacromial impingement	Pain	VAS- night pain	Multiple exercise types	Resistance	Flexibility, Resistance	Isometric	Concentric and eccentric, Isometric, Static, Dynamic	20	50.73333333	NA	43.33333333	NA	NA	Unsupervised	NA	Unclear	Unclear	Unclear	Unclear	Low risk	Unclear	Unclear	6	Short	1074	122	0.681703017	0.211785766
3	106. Walther et al 2004	RCT	Rotator cuff - subacromial impingement	Pain	VAS- night pain	Multiple exercise types	Resistance	Flexibility, Resistance	Isometric	Concentric and eccentric, Isometric, Static, Dynamic	20	50.73333333	NA	43.33333333	NA	NA	Unsupervised	NA	Unclear	Unclear	Unclear	Unclear	Low risk	Unclear	Unclear	12	Short	1074	123	1.323695178	0.288975779
3	106. Walther et al 2004	RCT	Rotator cuff - subacromial impingement	Disability	Constant- mobility	Multiple exercise types	Resistance	Flexibility, Resistance	Isometric	Concentric and eccentric, Isometric, Static, Dynamic	20	50.73333333	NA	43.33333333	NA	NA	Unsupervised	NA	Unclear	Unclear	Unclear	Unclear	Low risk	Unclear	Unclear	6	Short	1075	124	0.02658693	0.175846321
3	106. Walther et al 2004	RCT	Rotator cuff - subacromial impingement	Disability	Constant- mobility	Multiple exercise types	Resistance	Flexibility, Resistance	Isometric	Concentric and eccentric, Isometric, Static, Dynamic	20	50.73333333	NA	43.33333333	NA	NA	Unsupervised	NA	Unclear	Unclear	Unclear	Unclear	Low risk	Unclear	Unclear	12	Short	1075	125	0.265869305	0.181722216
3	106. Walther et al 2004	RCT	Rotator cuff - subacromial impingement	Physical function capacity	Constant- muscle strength	Multiple exercise types	Resistance	Flexibility, Resistance	Isometric	Concentric and eccentric, Isometric, Static, Dynamic	20	50.73333333	NA	43.33333333	NA	NA	Unsupervised	NA	Unclear	Unclear	Unclear	Unclear	Low risk	Unclear	Unclear	6	Short	1076	126	0.235132752	0.18044564
3	106. Walther et al 2004	RCT	Rotator cuff - subacromial impingement	Physical function capacity	Constant- muscle strength	Multiple exercise types	Resistance	Flexibility, Resistance	Isometric	Concentric and eccentric, Isometric, Static, Dynamic	20	50.73333333	NA	43.33333333	NA	NA	Unsupervised	NA	Unclear	Unclear	Unclear	Unclear	Low risk	Unclear	Unclear	12	Short	1076	127	0.213757047	0.179645605
3	106. Walther et al 2004	RCT	Rotator cuff - subacromial impingement	Disability	Constant- total	Multiple exercise types	Resistance	Flexibility, Resistance	Isometric	Concentric and eccentric, Isometric, Static, Dynamic	20	50.73333333	NA	43.33333333	NA	NA	Unsupervised	NA	Unclear	Unclear	Unclear	Unclear	Low risk	Unclear	Unclear	6	Short	1077	128	0.515934863	0.197212151
3	106. Walther et al 2004	RCT	Rotator cuff - subacromial impingement	Disability	Constant- total	Multiple exercise types	Resistance	Flexibility, Resistance	Isometric	Concentric and eccentric, Isometric, Static, Dynamic	20	50.73333333	NA	43.33333333	NA	NA	Unsupervised	NA	Unclear	Unclear	Unclear	Unclear	Low risk	Unclear	Unclear	12	Short	1077	129	0.925317961	0.237922786
3	85. Senbursa et al 2011	RCT	Rotator cuff - subacromial impingement	Pain	VAS- night pain	Multiple exercise types	Resistance	Flexibility, Resistance	Concentric and eccentric	concentric and eccentric, static,dynamic	30	49	9.29	NA	NA	NA	Supervised	Clinic	Low risk	Unclear	Unclear	Unclear	Low risk	Unclear	Low risk	4	Short	1078	130	0.918050285	0.190241758
3	85. Senbursa et al 2011	RCT	Rotator cuff - subacromial impingement	Pain	VAS- night pain	Multiple exercise types	Resistance	Flexibility, Resistance	Concentric and eccentric	concentric and eccentric, static,dynamic	30	49	9.29	NA	NA	NA	Supervised	Clinic	Low risk	Unclear	Unclear	Unclear	Low risk	Unclear	Low risk	12	Short	1078	131	1.787354537	0.283420252
3	85. Senbursa et al 2011	RCT	Rotator cuff - subacromial impingement	Disability	MASES	Multiple exercise types	Resistance	Flexibility, Resistance	Concentric and eccentric	concentric and eccentric, static,dynamic	30	49	9.29	NA	NA	NA	Supervised	Clinic	Low risk	Unclear	Unclear	Unclear	Low risk	Unclear	Low risk	4	Short	1079	132	0.246387145	0.146678458
3	85. Senbursa et al 2011	RCT	Rotator cuff - subacromial impingement	Disability	MASES	Multiple exercise types	Resistance	Flexibility, Resistance	Concentric and eccentric	concentric and eccentric, static,dynamic	30	49	9.29	NA	NA	NA	Supervised	Clinic	Low risk	Unclear	Unclear	Unclear	Low risk	Unclear	Low risk	12	Short	1079	133	0.441443634	0.15502379
2	53. Ludewig et al 2003	RCT	Rotator cuff - subacromial impingement	Disability	SRQ	Multiple exercise types	Flexibility	Flexibility, Resistance	Dynamic	Dynamic, eccentric and concentric	30	48.75	2.1	0	NA	NA	Unsupervised	Home	Low risk	Unclear	High risk	Unclear	Low risk	Unclear	Low risk	10	Short	1080	134	1.097713117	0.207336228
2	53. Ludewig et al 2003	RCT	Rotator cuff - subacromial impingement	Disability	SPADI- work related pain	Multiple exercise types	Flexibility	Flexibility, Resistance	Dynamic	Dynamic, eccentric and concentric	30	48.75	2.1	0	NA	NA	Unsupervised	Home	Low risk	Unclear	High risk	Unclear	Low risk	Unclear	Low risk	10	Short	1082	135	1.270081293	0.225049936
2	53. Ludewig et al 2003	RCT	Rotator cuff - subacromial impingement	Function	SPADI- work related disability	Multiple exercise types	Flexibility	Flexibility, Resistance	Dynamic	Dynamic, eccentric and concentric	30	48.75	2.1	0	NA	NA	Unsupervised	Home	Low risk	Unclear	High risk	Unclear	Low risk	Unclear	Low risk	10	Short	1083	136	0.948327365	0.19300877
2	55. Maenhout et al 2013	RCT	Rotator cuff - subacromial impingement	Disability	SPADI	Exercise only	Resistance	Resistance	Concentric and eccentric	Concentric and eccentric	30	39.8	13	59	69.75	3.5	NA	Home	Unclear	High risk	High risk	High risk	Low risk	Unclear	Low risk	6	Short	1084	137	2.252703214	0.34001246
2	55. Maenhout et al 2013	RCT	Rotator cuff - subacromial impingement	Disability	SPADI	Exercise only	Resistance	Resistance	Concentric and eccentric	Concentric and eccentric	30	39.8	13	59	69.75	3.5	NA	Home	Unclear	High risk	High risk	High risk	Low risk	Unclear	Low risk	12	Short	1084	138	2.523705104	0.374032019
2	55. Maenhout et al 2013	RCT	Rotator cuff - subacromial impingement	Physical function capacity	Isometric strength abd 0	Exercise only	Resistance	Resistance	Concentric and eccentric	Concentric and eccentric	30	39.8	13	59	69.75	3.5	NA	Home	Unclear	High risk	High risk	High risk	Low risk	Unclear	Low risk	6	Short	1085	139	0.67826087	0.170319009
2	55. Maenhout et al 2013	RCT	Rotator cuff - subacromial impingement	Physical function capacity	Isometric strength abd 0	Exercise only	Resistance	Resistance	Concentric and eccentric	Concentric and eccentric	30	39.8	13	59	69.75	3.5	NA	Home	Unclear	High risk	High risk	High risk	Low risk	Unclear	Low risk	12	Short	1085	140	0.831304348	0.182603784
2	55. Maenhout et al 2013	RCT	Rotator cuff - subacromial impingement	Physical function capacity	Isometric strength abd 45	Exercise only	Resistance	Resistance	Concentric and eccentric	Concentric and eccentric	30	39.8	13	59	69.75	3.5	NA	Home	Unclear	High risk	High risk	High risk	Low risk	Unclear	Low risk	6	Short	1086	141	1.06892895	0.20449437
2	55. Maenhout et al 2013	RCT	Rotator cuff - subacromial impingement	Physical function capacity	Isometric strength abd 45	Exercise only	Resistance	Resistance	Concentric and eccentric	Concentric and eccentric	30	39.8	13	59	69.75	3.5	NA	Home	Unclear	High risk	High risk	High risk	Low risk	Unclear	Low risk	12	Short	1086	142	1.21145281	0.218899935
2	55. Maenhout et al 2013	RCT	Rotator cuff - subacromial impingement	Physical function capacity	Isometric strength abd 90	Exercise only	Resistance	Resistance	Concentric and eccentric	Concentric and eccentric	30	39.8	13	59	69.75	3.5	NA	Home	Unclear	High risk	High risk	High risk	Low risk	Unclear	Low risk	6	Short	1087	143	0.728517631	0.174170461
2	55. Maenhout et al 2013	RCT	Rotator cuff - subacromial impingement	Physical function capacity	Isometric strength abd 90	Exercise only	Resistance	Resistance	Concentric and eccentric	Concentric and eccentric	30	39.8	13	59	69.75	3.5	NA	Home	Unclear	High risk	High risk	High risk	Low risk	Unclear	Low risk	12	Short	1087	144	0.536802465	0.160570809
2	55. Maenhout et al 2013	RCT	Rotator cuff - subacromial impingement	Physical function capacity	Isometric strength ext rot	Exercise only	Resistance	Resistance	Concentric and eccentric	Concentric and eccentric	30	39.8	13	59	69.75	3.5	NA	Home	Unclear	High risk	High risk	High risk	Low risk	Unclear	Low risk	6	Short	1088	145	0.53602966	0.160522353
2	55. Maenhout et al 2013	RCT	Rotator cuff - subacromial impingement	Physical function capacity	Isometric strength ext rot	Exercise only	Resistance	Resistance	Concentric and eccentric	Concentric and eccentric	30	39.8	13	59	69.75	3.5	NA	Home	Unclear	High risk	High risk	High risk	Low risk	Unclear	Low risk	12	Short	1088	146	0.702123357	0.172124135
2	55. Maenhout et al 2013	RCT	Rotator cuff - subacromial impingement	Physical function capacity	Isometric strength int rot	Exercise only	Resistance	Resistance	Concentric and eccentric	Concentric and eccentric	30	39.8	13	59	69.75	3.5	NA	Home	Unclear	High risk	High risk	High risk	Low risk	Unclear	Low risk	6	Short	1089	147	0.224749164	0.146024852
2	55. Maenhout et al 2013	RCT	Rotator cuff - subacromial impingement	Physical function capacity	Isometric strength int rot	Exercise only	Resistance	Resistance	Concentric and eccentric	Concentric and eccentric	30	39.8	13	59	69.75	3.5	NA	Home	Unclear	High risk	High risk	High risk	Low risk	Unclear	Low risk	12	Short	1089	148	0.321070234	0.149364918
2	65. Nowotny et al 2018	RCT	Lateral elbow/tennis elbow	Physical function capacity	Grip strength- painfree	Exercise only	Resistance	Resistance	Eccentric only	Eccentric only	15	46	NA	57	NA	NA	NA	Home	Low risk	Unclear	Low risk	Low risk	High risk	Unclear	High risk	13.03572857	Medium	1090	149	0.275532468	0.21205856
2	65. Nowotny et al 2018	RCT	Lateral elbow/tennis elbow	Physical function capacity	Grip strength- painfree	Exercise only	Resistance	Resistance	Eccentric only	Eccentric only	12	46	NA	57	NA	NA	NA	Home	Low risk	Unclear	Low risk	Low risk	High risk	Unclear	High risk	52.14291429	Medium	1090	150	0.924916944	0.319657912
2	65. Nowotny et al 2018	RCT	Lateral elbow/tennis elbow	Physical function capacity	Grip strength- max	Exercise only	Resistance	Resistance	Eccentric only	Eccentric only	15	46	NA	57	NA	NA	NA	Home	Low risk	Unclear	Low risk	Low risk	High risk	Unclear	High risk	13.03572857	Medium	1091	151	0.1584866	0.206860543
2	65. Nowotny et al 2018	RCT	Lateral elbow/tennis elbow	Physical function capacity	Grip strength- max	Exercise only	Resistance	Resistance	Eccentric only	Eccentric only	12	46	NA	57	NA	NA	NA	Home	Low risk	Unclear	Low risk	Low risk	High risk	Unclear	High risk	52.14291429	Medium	1091	152	0.532329614	0.263081686
2	65. Nowotny et al 2018	RCT	Lateral elbow/tennis elbow	Disability	PTREE	Exercise only	Resistance	Resistance	Eccentric only	Eccentric only	15	46	NA	57	NA	NA	NA	Home	Low risk	Unclear	Low risk	Low risk	High risk	Unclear	High risk	13.03572857	Medium	1092	153	0.527918782	0.23164845
2	65. Nowotny et al 2018	RCT	Lateral elbow/tennis elbow	Disability	PTREE	Exercise only	Resistance	Resistance	Eccentric only	Eccentric only	12	46	NA	57	NA	NA	NA	Home	Low risk	Unclear	Low risk	Low risk	High risk	Unclear	High risk	52.14291429	Medium	1092	154	1.511037658	0.429489699
2	65. Nowotny et al 2018	RCT	Lateral elbow/tennis elbow	Disability	Placzek score	Exercise only	Resistance	Resistance	Eccentric only	Eccentric only	15	46	NA	57	NA	NA	NA	Home	Low risk	Unclear	Low risk	Low risk	High risk	Unclear	High risk	13.03572857	Medium	1093	155	2.309917355	0.520029071
2	65. Nowotny et al 2018	RCT	Lateral elbow/tennis elbow	Disability	Placzek score	Exercise only	Resistance	Resistance	Eccentric only	Eccentric only	12	46	NA	57	NA	NA	NA	Home	Low risk	Unclear	Low risk	Low risk	High risk	Unclear	High risk	52.14291429	Medium	1093	156	3.22410148	0.807417178
2	65. Nowotny et al 2018	RCT	Lateral elbow/tennis elbow	Pain	VAS	Exercise only	Resistance	Resistance	Eccentric only	Eccentric only	15	46	NA	57	NA	NA	NA	Home	Low risk	Unclear	Low risk	Low risk	High risk	Unclear	High risk	13.03572857	Medium	1094	157	0.202597403	0.208504257
2	65. Nowotny et al 2018	RCT	Lateral elbow/tennis elbow	Pain	VAS	Exercise only	Resistance	Resistance	Eccentric only	Eccentric only	12	46	NA	57	NA	NA	NA	Home	Low risk	Unclear	Low risk	Low risk	High risk	Unclear	High risk	52.14291429	Medium	1094	158	1.129568106	0.355543734
2	65. Nowotny et al 2018	RCT	Lateral elbow/tennis elbow	Disability	SEV	Exercise only	Resistance	Resistance	Eccentric only	Eccentric only	12	46	NA	57	NA	NA	NA	Home	Low risk	Unclear	Low risk	Low risk	High risk	Unclear	High risk	52.14291429	Medium	1095	159	0.647787494	0.277604234
2	76. Praet et al 2019	RCT	Achilles	Disability	VISA-A	Exercise only	Resistance	Resistance	Eccentric only	Eccentric Only	10	43.65	7.9	35	24.4	3.3	Unsupervised	Home	Low risk	Low risk	Low risk	Low risk	Low risk	Unclear	Low risk	13.03572857	Medium	1096	160	0.811383028	0.337190846
2	76. Praet et al 2019	RCT	Achilles	Disability	VISA-A	Exercise only	Resistance	Resistance	Eccentric only	Eccentric Only	9	43.65	7.9	35	24.4	3.3	Unsupervised	Home	Low risk	Low risk	Low risk	Low risk	Low risk	Unclear	Low risk	26.07145714	Medium	1096	161	0.395640208	0.293689588
2	29. Engebretsen et al 2009	RCT	Rotator cuff - subacromial impingement	Disability	SPADI	Multiple exercise types	Proprioception	Plyometric, Proprtioception, Resistance	Movement pattern retraining	movement pattern retraining, concentric and eccentric, plyometric	52	48	10.56	50	NA	NA	Supervised	Clinic	Low risk	Low risk	High risk	Low risk	Low risk	Unclear	Low risk	6	Short	1097	162	1.100004783	0.155231158
2	29. Engebretsen et al 2009	RCT	Rotator cuff - subacromial impingement	Disability	SPADI	Multiple exercise types	Proprioception	Plyometric, Proprtioception, Resistance	Movement pattern retraining	movement pattern retraining, concentric and eccentric, plyometric	52	48	10.56	50	NA	NA	Supervised	Clinic	Low risk	Low risk	High risk	Low risk	Low risk	Unclear	Low risk	12	Short	1097	163	1.042613229	0.151104356
2	29. Engebretsen et al 2009	RCT	Rotator cuff - subacromial impingement	Disability	SPADI	Multiple exercise types	Proprioception	Plyometric, Proprtioception, Resistance	Movement pattern retraining	movement pattern retraining, concentric and eccentric, plyometric	52	48	10.56	50	NA	NA	Supervised	Clinic	Low risk	Low risk	High risk	Low risk	Low risk	Unclear	Low risk	18	Medium	1097	164	1.162178966	0.159820751
2	29. Engebretsen et al 2009	RCT	Rotator cuff - subacromial impingement	Pain	VAS- pain on activity	Multiple exercise types	Proprioception	Plyometric, Proprtioception, Resistance	Movement pattern retraining	movement pattern retraining, concentric and eccentric, plyometric	52	48	10.56	50	NA	NA	Supervised	Clinic	Low risk	Low risk	High risk	Low risk	Low risk	Unclear	Low risk	6	Short	1098	165	0.837438424	0.137356825
2	29. Engebretsen et al 2009	RCT	Rotator cuff - subacromial impingement	Pain	VAS- pain on activity	Multiple exercise types	Proprioception	Plyometric, Proprtioception, Resistance	Movement pattern retraining	movement pattern retraining, concentric and eccentric, plyometric	52	48	10.56	50	NA	NA	Supervised	Clinic	Low risk	Low risk	High risk	Low risk	Low risk	Unclear	Low risk	12	Short	1098	166	0.935960591	0.143746701
2	29. Engebretsen et al 2009	RCT	Rotator cuff - subacromial impingement	Pain	VAS- pain on activity	Multiple exercise types	Proprioception	Plyometric, Proprtioception, Resistance	Movement pattern retraining	movement pattern retraining, concentric and eccentric, plyometric	52	48	10.56	50	NA	NA	Supervised	Clinic	Low risk	Low risk	High risk	Low risk	Low risk	Unclear	Low risk	18	Medium	1098	167	0.985221675	0.147092028
2	29. Engebretsen et al 2009	RCT	Rotator cuff - subacromial impingement	Pain	VAS- pain last week	Multiple exercise types	Proprioception	Plyometric, Proprtioception, Resistance	Movement pattern retraining	movement pattern retraining, concentric and eccentric, plyometric	52	48	10.56	50	NA	NA	Supervised	Clinic	Low risk	Low risk	High risk	Low risk	Low risk	Unclear	Low risk	6	Short	1099	168	0.414830179	0.115871526
2	29. Engebretsen et al 2009	RCT	Rotator cuff - subacromial impingement	Pain	VAS- pain last week	Multiple exercise types	Proprioception	Plyometric, Proprtioception, Resistance	Movement pattern retraining	movement pattern retraining, concentric and eccentric, plyometric	52	48	10.56	50	NA	NA	Supervised	Clinic	Low risk	Low risk	High risk	Low risk	Low risk	Unclear	Low risk	12	Short	1099	169	0.466683951	0.117881868
2	29. Engebretsen et al 2009	RCT	Rotator cuff - subacromial impingement	Pain	VAS- pain last week	Multiple exercise types	Proprioception	Plyometric, Proprtioception, Resistance	Movement pattern retraining	movement pattern retraining, concentric and eccentric, plyometric	52	48	10.56	50	NA	NA	Supervised	Clinic	Low risk	Low risk	High risk	Low risk	Low risk	Unclear	Low risk	18	Medium	1099	170	0.466683951	0.117881868
2	29. Engebretsen et al 2009	RCT	Rotator cuff - subacromial impingement	Function	Function- shopping bag	Multiple exercise types	Proprioception	Plyometric, Proprtioception, Resistance	Movement pattern retraining	movement pattern retraining, concentric and eccentric, plyometric	52	48	10.56	50	NA	NA	Supervised	Clinic	Low risk	Low risk	High risk	Low risk	Low risk	Unclear	Low risk	6	Short	1100	171	0.602079912	0.124031455
2	29. Engebretsen et al 2009	RCT	Rotator cuff - subacromial impingement	Function	Function- shopping bag	Multiple exercise types	Proprioception	Plyometric, Proprtioception, Resistance	Movement pattern retraining	movement pattern retraining, concentric and eccentric, plyometric	52	48	10.56	50	NA	NA	Supervised	Clinic	Low risk	Low risk	High risk	Low risk	Low risk	Unclear	Low risk	12	Short	1100	172	0.602079912	0.124031455
2	29. Engebretsen et al 2009	RCT	Rotator cuff - subacromial impingement	Function	Function- shopping bag	Multiple exercise types	Proprioception	Plyometric, Proprtioception, Resistance	Movement pattern retraining	movement pattern retraining, concentric and eccentric, plyometric	52	48	10.56	50	NA	NA	Supervised	Clinic	Low risk	Low risk	High risk	Low risk	Low risk	Unclear	Low risk	18	Medium	1100	173	0.711548987	0.129854416
2	29. Engebretsen et al 2009	RCT	Rotator cuff - subacromial impingement	Function	Function- taking down from cupboard	Multiple exercise types	Proprioception	Plyometric, Proprtioception, Resistance	Movement pattern retraining	movement pattern retraining, concentric and eccentric, plyometric	52	48	10.56	50	NA	NA	Supervised	Clinic	Low risk	Low risk	High risk	Low risk	Low risk	Unclear	Low risk	6	Short	1101	174	1.231527094	0.165073442
2	29. Engebretsen et al 2009	RCT	Rotator cuff - subacromial impingement	Function	Function- taking down from cupboard	Multiple exercise types	Proprioception	Plyometric, Proprtioception, Resistance	Movement pattern retraining	movement pattern retraining, concentric and eccentric, plyometric	52	48	10.56	50	NA	NA	Supervised	Clinic	Low risk	Low risk	High risk	Low risk	Low risk	Unclear	Low risk	12	Short	1101	175	1.477832512	0.184688361
2	29. Engebretsen et al 2009	RCT	Rotator cuff - subacromial impingement	Function	Function- taking down from cupboard	Multiple exercise types	Proprioception	Plyometric, Proprtioception, Resistance	Movement pattern retraining	movement pattern retraining, concentric and eccentric, plyometric	52	48	10.56	50	NA	NA	Supervised	Clinic	Low risk	Low risk	High risk	Low risk	Low risk	Unclear	Low risk	18	Medium	1101	176	1.395730706	0.178000966
2	30. Engebretsen et al 2011	RCT	Rotator cuff - subacromial impingement	Disability	SPADI	Exercise only	Proprioception	Proprioception	Movement pattern retraining	Movement pattern retraining	52	48	10.6	50	NA	NA	Supervised	Clinic	Low risk	Low risk	High risk	Low risk	Low risk	Unclear	Low risk	52	Medium	1102	177	1.186092113	0.161616752
2	30. Engebretsen et al 2011	RCT	Rotator cuff - subacromial impingement	Pain	Pain- rest (9 pt Likert)	Exercise only	Proprioception	Proprioception	Movement pattern retraining	Movement pattern retraining	52	48	10.6	50	NA	NA	Supervised	Clinic	Low risk	Low risk	High risk	Low risk	Low risk	Unclear	Low risk	52	Medium	1103	178	0.674099041	0.12778374
2	30. Engebretsen et al 2011	RCT	Rotator cuff - subacromial impingement	Pain	Pain- activity (9 pt Likert)	Exercise only	Proprioception	Proprioception	Movement pattern retraining	Movement pattern retraining	52	48	10.6	50	NA	NA	Supervised	Clinic	Low risk	Low risk	High risk	Low risk	Low risk	Unclear	Low risk	52	Medium	1104	179	1.034482759	0.150528769
2	30. Engebretsen et al 2011	RCT	Rotator cuff - subacromial impingement	Function	Function- Carry	Exercise only	Proprioception	Proprioception	Movement pattern retraining	Movement pattern retraining	52	48	10.6	50	NA	NA	Supervised	Clinic	Low risk	Low risk	High risk	Low risk	Low risk	Unclear	Low risk	52	Medium	1105	180	0.711548987	0.129854416
2	30. Engebretsen et al 2011	RCT	Rotator cuff - subacromial impingement	Function	Function- taking down from cupboard	Exercise only	Proprioception	Proprioception	Movement pattern retraining	Movement pattern retraining	52	48	10.6	50	NA	NA	Supervised	Clinic	Low risk	Low risk	High risk	Low risk	Low risk	Unclear	Low risk	52	Medium	1106	181	1.477832512	0.184688361
2	11. Baskurt et al 2011	Quasi-experimental	Rotator cuff - subacromial impingement	Pain	VAS- rest	Multiple exercise types	Flexibility	Flexibility, Resistance	Dynamic	Dynamic, static, concentric and eccentric	20	51.38	9.97	67.5	25.84	3.05	Supervised	Clinic	Low risk	Unclear	High risk	Unclear	Low risk	Unclear	Low risk	6	Short	1107	182	0.956756757	0.241627294
2	11. Baskurt et al 2011	Quasi-experimental	Rotator cuff - subacromial impingement	Pain	VAS- activity	Multiple exercise types	Flexibility	Flexibility, Resistance	Dynamic	Dynamic, static, concentric and eccentric	20	51.38	9.97	67.5	25.84	3.05	Supervised	Clinic	Low risk	Unclear	High risk	Unclear	Low risk	Unclear	Low risk	6	Short	1108	183	3.645112782	0.655605639
2	11. Baskurt et al 2011	Quasi-experimental	Rotator cuff - subacromial impingement	ROM - Shoulder	ROM- flexion	Multiple exercise types	Flexibility	Flexibility, Resistance	Dynamic	Dynamic, static, concentric and eccentric	20	51.38	9.97	67.5	25.84	3.05	Supervised	Clinic	Low risk	Unclear	Low risk	Unclear	Low risk	Unclear	Low risk	6	Short	1109	184	0.645378151	0.208340814
2	11. Baskurt et al 2011	Quasi-experimental	Rotator cuff - subacromial impingement	ROM - Shoulder	ROM- abduction	Multiple exercise types	Flexibility	Flexibility, Resistance	Dynamic	Dynamic, static, concentric and eccentric	20	51.38	9.97	67.5	25.84	3.05	Supervised	Clinic	Low risk	Unclear	Low risk	Unclear	Low risk	Unclear	Low risk	6	Short	1110	185	0.512455516	0.196939596
2	11. Baskurt et al 2011	Quasi-experimental	Rotator cuff - subacromial impingement	ROM - Shoulder	ROM- int rotation	Multiple exercise types	Flexibility	Flexibility, Resistance	Dynamic	Dynamic, static, concentric and eccentric	20	51.38	9.97	67.5	25.84	3.05	Supervised	Clinic	Low risk	Unclear	Low risk	Unclear	Low risk	Unclear	Low risk	6	Short	1111	186	0.613533835	0.205431925
2	11. Baskurt et al 2011	Quasi-experimental	Rotator cuff - subacromial impingement	ROM - Shoulder	ROM- ext rotation	Multiple exercise types	Flexibility	Flexibility, Resistance	Dynamic	Dynamic, static, concentric and eccentric	20	51.38	9.97	67.5	25.84	3.05	Supervised	Clinic	Low risk	Unclear	Low risk	Unclear	Low risk	Unclear	Low risk	6	Short	1112	187	0.630098453	0.206931799
2	11. Baskurt et al 2011	Quasi-experimental	Rotator cuff - subacromial impingement	Physical function capacity	Strength- Lower trapz	Multiple exercise types	Flexibility	Flexibility, Resistance	Dynamic	Dynamic, static, concentric and eccentric	20	51.38	9.97	67.5	25.84	3.05	Supervised	Clinic	Low risk	Unclear	Low risk	Unclear	Low risk	Unclear	Low risk	6	Short	1113	188	0.32627451	0.184653357
2	11. Baskurt et al 2011	Quasi-experimental	Rotator cuff - subacromial impingement	Physical function capacity	Strength- Upper trapz	Multiple exercise types	Flexibility	Flexibility, Resistance	Dynamic	Dynamic, static, concentric and eccentric	20	51.38	9.97	67.5	25.84	3.05	Supervised	Clinic	Low risk	Unclear	Low risk	Unclear	Low risk	Unclear	Low risk	6	Short	1114	189	0.267341772	0.181787063
2	11. Baskurt et al 2011	Quasi-experimental	Rotator cuff - subacromial impingement	Physical function capacity	Strength- Middle trapz	Multiple exercise types	Flexibility	Flexibility, Resistance	Dynamic	Dynamic, static, concentric and eccentric	20	51.38	9.97	67.5	25.84	3.05	Supervised	Clinic	Low risk	Unclear	Low risk	Unclear	Low risk	Unclear	Low risk	6	Short	1115	190	0.210410959	0.179526964
2	11. Baskurt et al 2011	Quasi-experimental	Rotator cuff - subacromial impingement	Physical function capacity	Strength- serratus anterior	Multiple exercise types	Flexibility	Flexibility, Resistance	Dynamic	Dynamic, static, concentric and eccentric	20	51.38	9.97	67.5	25.84	3.05	Supervised	Clinic	Low risk	Unclear	Low risk	Unclear	Low risk	Unclear	Low risk	6	Short	1116	191	0.291929825	0.182919113
2	11. Baskurt et al 2011	Quasi-experimental	Rotator cuff - subacromial impingement	Physical function capacity	Strength- Supraspinatus	Multiple exercise types	Flexibility	Flexibility, Resistance	Dynamic	Dynamic, static, concentric and eccentric	20	51.38	9.97	67.5	25.84	3.05	Supervised	Clinic	Low risk	Unclear	Low risk	Unclear	Low risk	Unclear	Low risk	6	Short	1117	192	0.785046729	0.222270461
2	11. Baskurt et al 2011	Quasi-experimental	Rotator cuff - subacromial impingement	Physical function capacity	Strength- Subscapularis	Multiple exercise types	Flexibility	Flexibility, Resistance	Dynamic	Dynamic, static, concentric and eccentric	20	51.38	9.97	67.5	25.84	3.05	Supervised	Clinic	Low risk	Unclear	Low risk	Unclear	Low risk	Unclear	Low risk	6	Short	1118	193	0.489536424	0.195181254
2	11. Baskurt et al 2011	Quasi-experimental	Rotator cuff - subacromial impingement	Physical function capacity	Strength- Infraspinatus	Multiple exercise types	Flexibility	Flexibility, Resistance	Dynamic	Dynamic, static, concentric and eccentric	20	51.38	9.97	67.5	25.84	3.05	Supervised	Clinic	Low risk	Unclear	Low risk	Unclear	Low risk	Unclear	Low risk	6	Short	1119	194	0.631578947	0.207067261
2	11. Baskurt et al 2011	Quasi-experimental	Rotator cuff - subacromial impingement	Disability	WORC	Multiple exercise types	Flexibility	Flexibility, Resistance	Dynamic	Dynamic, static, concentric and eccentric	20	51.38	9.97	67.5	25.84	3.05	Supervised	Clinic	Low risk	Unclear	High risk	Unclear	Low risk	Unclear	Low risk	6	Short	1120	195	1.88427907	0.370809217
2	13. Blume et al 2015	RCT	Rotator cuff - subacromial impingement	Disability	DASH	Multiple exercise types	Resistance	Flexibility, Resistance	Concentric only	Concentric only, static, dynamic,	16	49.4	15.6	58	NA	NA	Supervised	Clinic	Unclear	Low risk	Low risk	Low risk	Low risk	Unclear	Low risk	5	Short	1121	196	1.299608866	0.325080388
2	13. Blume et al 2015	RCT	Rotator cuff - subacromial impingement	Disability	DASH	Multiple exercise types	Resistance	Flexibility, Resistance	Concentric only	Concentric only, static, dynamic,	16	49.4	15.6	58	NA	NA	Supervised	Clinic	Unclear	Low risk	Low risk	Low risk	Low risk	Unclear	Low risk	8	Short	1121	197	1.73767927	0.397767919
2	13. Blume et al 2015	RCT	Rotator cuff - subacromial impingement	ROM - Shoulder	AROM- elevation	Multiple exercise types	Resistance	Flexibility, Resistance	Concentric only	Concentric only, static, dynamic,	16	49.4	15.6	58	NA	NA	Supervised	Clinic	Unclear	Low risk	Low risk	Low risk	Low risk	Unclear	Low risk	5	Short	1122	198	0.474576271	0.218802832
2	13. Blume et al 2015	RCT	Rotator cuff - subacromial impingement	ROM - Shoulder	AROM- elevation	Multiple exercise types	Resistance	Flexibility, Resistance	Concentric only	Concentric only, static, dynamic,	16	49.4	15.6	58	NA	NA	Supervised	Clinic	Unclear	Low risk	Low risk	Low risk	Low risk	Unclear	Low risk	8	Short	1122	199	0.498437648	0.220888015
2	13. Blume et al 2015	RCT	Rotator cuff - subacromial impingement	Physical function capacity	Dynamometer- abduction	Multiple exercise types	Resistance	Flexibility, Resistance	Concentric only	Concentric only, static, dynamic,	16	49.4	15.6	58	NA	NA	Supervised	Clinic	Unclear	Low risk	Low risk	Low risk	Low risk	Unclear	Low risk	5	Short	1123	200	0.219035202	0.202176622
2	13. Blume et al 2015	RCT	Rotator cuff - subacromial impingement	Physical function capacity	Dynamometer- abduction	Multiple exercise types	Resistance	Flexibility, Resistance	Concentric only	Concentric only, static, dynamic,	16	49.4	15.6	58	NA	NA	Supervised	Clinic	Unclear	Low risk	Low risk	Low risk	Low risk	Unclear	Low risk	8	Short	1123	201	0.738229755	0.245971
2	13. Blume et al 2015	RCT	Rotator cuff - subacromial impingement	Physical function capacity	Dynamometer- ext rotation	Multiple exercise types	Resistance	Flexibility, Resistance	Concentric only	Concentric only, static, dynamic,	16	49.4	15.6	58	NA	NA	Supervised	Clinic	Unclear	Low risk	Low risk	Low risk	Low risk	Unclear	Low risk	5	Short	1124	202	0.359387856	0.209955324
2	13. Blume et al 2015	RCT	Rotator cuff - subacromial impingement	Physical function capacity	Dynamometer- ext rotation	Multiple exercise types	Resistance	Flexibility, Resistance	Concentric only	Concentric only, static, dynamic,	16	49.4	15.6	58	NA	NA	Supervised	Clinic	Unclear	Low risk	Low risk	Low risk	Low risk	Unclear	Low risk	8	Short	1124	203	0.764851078	0.249162296
2	14. Boudreau et al 2019	RCT	Rotator cuff - subacromial impingement	Disability	DASH	Exercise only	Resistance	Resistance	Concentric and eccentric	concentric and eccentric	21	42.9	11.96	52.38	NA	NA	Unsupervised	Home	Low risk	Low risk	Low risk	Low risk	Low risk	Low risk	Low risk	3	Short	1125	204	0.024201895	0.171456443
2	14. Boudreau et al 2019	RCT	Rotator cuff - subacromial impingement	Disability	DASH	Exercise only	Resistance	Resistance	Concentric and eccentric	concentric and eccentric	21	42.9	11.96	52.38	NA	NA	Unsupervised	Home	Low risk	Low risk	Low risk	Low risk	Low risk	Low risk	Low risk	6	Short	1125	205	0.090757105	0.172087279
2	14. Boudreau et al 2019	RCT	Rotator cuff - subacromial impingement	Disability	WORC	Exercise only	Resistance	Resistance	Concentric and eccentric	concentric and eccentric	21	42.9	11.96	52.38	NA	NA	Unsupervised	Home	Low risk	Low risk	Low risk	Low risk	Low risk	Low risk	Low risk	3	Short	1126	206	0.498458713	0.190836158
2	14. Boudreau et al 2019	RCT	Rotator cuff - subacromial impingement	Disability	WORC	Exercise only	Resistance	Resistance	Concentric and eccentric	concentric and eccentric	21	42.9	11.96	52.38	NA	NA	Unsupervised	Home	Low risk	Low risk	Low risk	Low risk	Low risk	Low risk	Low risk	6	Short	1126	207	0.593165869	0.198360363
2	14. Boudreau et al 2019	RCT	Rotator cuff - subacromial impingement	Pain	VAS- rest	Exercise only	Resistance	Resistance	Concentric and eccentric	concentric and eccentric	21	42.9	11.96	52.38	NA	NA	Unsupervised	Home	Low risk	Low risk	Low risk	Low risk	Low risk	Low risk	Low risk	3	Short	1127	208	-0.659674503	0.204222979
2	14. Boudreau et al 2019	RCT	Rotator cuff - subacromial impingement	Pain	VAS- rest	Exercise only	Resistance	Resistance	Concentric and eccentric	concentric and eccentric	21	42.9	11.96	52.38	NA	NA	Unsupervised	Home	Low risk	Low risk	Low risk	Low risk	Low risk	Low risk	Low risk	6	Short	1127	209	-0.563471971	0.195892831
2	14. Boudreau et al 2019	RCT	Rotator cuff - subacromial impingement	Pain	VAS- movement	Exercise only	Resistance	Resistance	Concentric and eccentric	concentric and eccentric	21	42.9	11.96	52.38	NA	NA	Unsupervised	Home	Low risk	Low risk	Low risk	Low risk	Low risk	Low risk	Low risk	3	Short	1128	210	1.14556962	0.257978229
2	14. Boudreau et al 2019	RCT	Rotator cuff - subacromial impingement	Pain	VAS- movement	Exercise only	Resistance	Resistance	Concentric and eccentric	concentric and eccentric	21	42.9	11.96	52.38	NA	NA	Unsupervised	Home	Low risk	Low risk	Low risk	Low risk	Low risk	Low risk	Low risk	6	Short	1129	211	1.563291139	0.314013006
2	44. Kim et al 2017	RCT	Rotator cuff - subacromial impingement	Pain	NPRS- pain intensity	Exercise only	Proprioception	Proprioception	Movement pattern retraining	Movement pattern retraining	20	51.08	10.62	72.5	NA	NA	Supervised	Clinic	Low risk	Unclear	Unclear	Low risk	Unclear	Low risk	Low risk	5	Short	1130	212	1.888	0.371377029
2	44. Kim et al 2017	RCT	Rotator cuff - subacromial impingement	ROM - Shoulder	ROM- flexion	Exercise only	Proprioception	Proprioception	Movement pattern retraining	Movement pattern retraining	20	51.08	10.62	72.5	NA	NA	Supervised	Clinic	Low risk	Unclear	Unclear	Low risk	Unclear	Low risk	Low risk	5	Short	1131	213	1.208808583	0.273444022
2	44. Kim et al 2017	RCT	Rotator cuff - subacromial impingement	Physical function capacity	Strength- scaption	Exercise only	Proprioception	Proprioception	Movement pattern retraining	Movement pattern retraining	20	51.08	10.62	72.5	NA	NA	Supervised	Clinic	Low risk	Unclear	Unclear	Low risk	Unclear	Low risk	Low risk	5	Short	1132	214	0.886543536	0.233448029
2	44. Kim et al 2017	RCT	Rotator cuff - subacromial impingement	Disability	Q-DASH	Exercise only	Proprioception	Proprioception	Movement pattern retraining	Movement pattern retraining	20	51.08	10.62	72.5	NA	NA	Supervised	Clinic	Low risk	Unclear	Unclear	Low risk	Unclear	Low risk	Low risk	5	Short	1133	215	0.738051489	0.217382435
2	103. Vinuesa-Montoya et al 2017	RCT	Rotator cuff - subacromial impingement	Pain	VAS- pain intensity	Multiple exercise types	Resistance	Flexibility, Resistance	Concentric and eccentric	Concentric and eccentric,static, dynamic	19	47	9	26.8	28.99	3.66	Unsupervised	Home	Low risk	Low risk	High risk	Low risk	Low risk	Low risk	Low risk	5	Short	1134	216	0.673198612	0.216937211
2	103. Vinuesa-Montoya et al 2017	RCT	Rotator cuff - subacromial impingement	Disability	DASH	Multiple exercise types	Resistance	Flexibility, Resistance	Concentric and eccentric	Concentric and eccentric,static, dynamic	19	47	9	26.8	28.99	3.66	Unsupervised	Home	Low risk	Low risk	High risk	Low risk	Low risk	Low risk	Low risk	5	Short	1135	217	0.526480521	0.203568611
2	103. Vinuesa-Montoya et al 2017	RCT	Rotator cuff - subacromial impingement	Disability	SDQ	Multiple exercise types	Resistance	Flexibility, Resistance	Concentric and eccentric	Concentric and eccentric,static, dynamic	19	47	9	26.8	28.99	3.66	Unsupervised	Home	Low risk	Low risk	High risk	Low risk	Low risk	Low risk	Low risk	5	Short	1136	218	0.809307149	0.231314243
2	103. Vinuesa-Montoya et al 2017	RCT	Rotator cuff - subacromial impingement	ROM - Shoulder	AROM- flexion	Multiple exercise types	Resistance	Flexibility, Resistance	Concentric and eccentric	Concentric and eccentric,static, dynamic	19	47	9	26.8	28.99	3.66	Unsupervised	Home	Low risk	Low risk	High risk	Low risk	Low risk	Low risk	Low risk	5	Short	1137	219	0.501698039	0.201559843
2	103. Vinuesa-Montoya et al 2017	RCT	Rotator cuff - subacromial impingement	ROM - Shoulder	AROM- extension	Multiple exercise types	Resistance	Flexibility, Resistance	Concentric and eccentric	Concentric and eccentric,static, dynamic	19	47	9	26.8	28.99	3.66	Unsupervised	Home	Low risk	Low risk	High risk	Low risk	Low risk	Low risk	Low risk	5	Short	1138	220	0.524151799	0.203376593
2	103. Vinuesa-Montoya et al 2017	RCT	Rotator cuff - subacromial impingement	ROM - Shoulder	AROM- ext rotation	Multiple exercise types	Resistance	Flexibility, Resistance	Concentric and eccentric	Concentric and eccentric,static, dynamic	19	47	9	26.8	28.99	3.66	Unsupervised	Home	Low risk	Low risk	High risk	Low risk	Low risk	Low risk	Low risk	5	Short	1139	221	0.427205337	0.196000929
2	103. Vinuesa-Montoya et al 2017	RCT	Rotator cuff - subacromial impingement	ROM - Shoulder	AROM- int rotation	Multiple exercise types	Resistance	Flexibility, Resistance	Concentric and eccentric	Concentric and eccentric,static, dynamic	19	47	9	26.8	28.99	3.66	Unsupervised	Home	Low risk	Low risk	High risk	Low risk	Low risk	Low risk	Low risk	5	Short	1140	222	0.366823161	0.192054905
2	103. Vinuesa-Montoya et al 2017	RCT	Rotator cuff - subacromial impingement	ROM - Shoulder	AROM- adduction	Multiple exercise types	Resistance	Flexibility, Resistance	Concentric and eccentric	Concentric and eccentric,static, dynamic	19	47	9	26.8	28.99	3.66	Unsupervised	Home	Low risk	Low risk	High risk	Low risk	Low risk	Low risk	Low risk	5	Short	1141	223	0.75537253	0.225412975
2	103. Vinuesa-Montoya et al 2017	RCT	Rotator cuff - subacromial impingement	ROM - Shoulder	AROM- abduction	Multiple exercise types	Resistance	Flexibility, Resistance	Concentric and eccentric	Concentric and eccentric,static, dynamic	19	47	9	26.8	28.99	3.66	Unsupervised	Home	Low risk	Low risk	High risk	Low risk	Low risk	Low risk	Low risk	5	Short	1142	224	0.540619073	0.204748718
2	102. vanArk et al 2016	RCT	Patellar	Pain	NRS- pain SLDS activity	Exercise only	Resistance	Resistance	Isometric	Isometric	8	23	4.7	6.9	24	3	Unsupervised	Fitness Facility	Low risk	Low risk	Low risk	Unclear	Unclear	Low risk	Low risk	4	Short	1143	225	1.345947495	0.524693233
2	102. vanArk et al 2016	RCT	Patellar	Disability	VISA-P	Exercise only	Resistance	Resistance	Isometric	Isometric	8	23	4.7	6.9	24	3	Unsupervised	Fitness Facility	Low risk	Low risk	Low risk	Unclear	Unclear	Low risk	Low risk	4	Short	1144	226	0.518776584	0.333971808
2	8. Bahr et al 2006	RCT	Patellar	Disability	VISA	Exercise only	Resistance	Resistance	Eccentric only	Eccentric Only	20	30.5	7.9	12.5	NA	NA	Unsupervised	Home	Low risk	Low risk	High risk	Low risk	Low risk	Unclear	Low risk	13.03572857	Medium	1145	227	1.402394452	0.2999138
2	8. Bahr et al 2006	RCT	Patellar	Disability	VISA	Exercise only	Resistance	Resistance	Eccentric only	Eccentric Only	20	30.5	7.9	12.5	NA	NA	Unsupervised	Home	Low risk	Low risk	High risk	Low risk	Low risk	Unclear	Low risk	26.07145714	Medium	1145	228	1.676266575	0.339503917
2	8. Bahr et al 2006	RCT	Patellar	Disability	VISA	Exercise only	Resistance	Resistance	Eccentric only	Eccentric Only	20	30.5	7.9	12.5	NA	NA	Unsupervised	Home	Low risk	Low risk	High risk	Low risk	Low risk	Unclear	Low risk	52.14291429	Medium	1145	229	2.243856628	0.426691869
2	8. Bahr et al 2006	RCT	Patellar	Physical function capacity	Standing jump	Exercise only	Resistance	Resistance	Eccentric only	Eccentric Only	20	30.5	7.9	12.5	NA	NA	Unsupervised	Home	Low risk	Low risk	High risk	Low risk	Low risk	Unclear	Low risk	26.07145714	Medium	1146	230	0.280492363	0.182381019
2	8. Bahr et al 2006	RCT	Patellar	Physical function capacity	Standing jump	Exercise only	Resistance	Resistance	Eccentric only	Eccentric Only	20	30.5	7.9	12.5	NA	NA	Unsupervised	Home	Low risk	Low risk	High risk	Low risk	Low risk	Unclear	Low risk	52.14291429	Medium	1146	231	0.128559	0.177191753
2	8. Bahr et al 2006	RCT	Patellar	Physical function capacity	Counter movement jump	Exercise only	Resistance	Resistance	Eccentric only	Eccentric Only	20	30.5	7.9	12.5	NA	NA	Unsupervised	Home	Low risk	Low risk	High risk	Low risk	Low risk	Unclear	Low risk	26.07145714	Medium	1147	232	0.384152712	0.187966426
2	8. Bahr et al 2006	RCT	Patellar	Physical function capacity	Counter movement jump	Exercise only	Resistance	Resistance	Eccentric only	Eccentric Only	20	30.5	7.9	12.5	NA	NA	Unsupervised	Home	Low risk	Low risk	High risk	Low risk	Low risk	Unclear	Low risk	52.14291429	Medium	1147	233	0.10975792	0.176811746
2	8. Bahr et al 2006	RCT	Patellar	Physical function capacity	Leg press	Exercise only	Resistance	Resistance	Eccentric only	Eccentric Only	20	30.5	7.9	12.5	NA	NA	Unsupervised	Home	Low risk	Low risk	High risk	Low risk	Low risk	Unclear	Low risk	26.07145714	Medium	1148	234	0.72985277	0.216549744
2	8. Bahr et al 2006	RCT	Patellar	Physical function capacity	Leg press	Exercise only	Resistance	Resistance	Eccentric only	Eccentric Only	20	30.5	7.9	12.5	NA	NA	Unsupervised	Home	Low risk	Low risk	High risk	Low risk	Low risk	Unclear	Low risk	52.14291429	Medium	1148	235	1.373840508	0.295919328
2	59. Marzetti et al 2014	RCT	Rotator cuff - subacromial impingement	Disability	Quick DASH	Multiple exercise types	Resistance	Flexibility, Resistance	Concentric and eccentric	concentric and eccentric, dynamic, static	24	62.1	12.5	61.4	NR	NA	Supervised	Clinic	Low risk	Low risk	Low risk	Low risk	Low risk	Low risk	Low risk	5	Short	1149	236	0.518293152	0.179193123
2	59. Marzetti et al 2014	RCT	Rotator cuff - subacromial impingement	Disability	Quick DASH	Multiple exercise types	Resistance	Flexibility, Resistance	Concentric and eccentric	concentric and eccentric, dynamic, static	24	62.1	12.5	61.4	NR	NA	Supervised	Clinic	Low risk	Low risk	Low risk	Low risk	Low risk	Low risk	Low risk	12	Short	1149	237	0.552378195	0.181642154
2	59. Marzetti et al 2014	RCT	Rotator cuff - subacromial impingement	Disability	Quick DASH	Multiple exercise types	Resistance	Flexibility, Resistance	Concentric and eccentric	concentric and eccentric, dynamic, static	24	62.1	12.5	61.4	NR	NA	Supervised	Clinic	Low risk	Low risk	Low risk	Low risk	Low risk	Low risk	Low risk	24	Medium	1149	238	0.594483248	0.184832839
2	59. Marzetti et al 2014	RCT	Rotator cuff - subacromial impingement	Disability	Constant-murley score	Multiple exercise types	Resistance	Flexibility, Resistance	Concentric and eccentric	concentric and eccentric, dynamic, static	24	62.1	12.5	61.4	NR	NA	Supervised	Clinic	Low risk	Low risk	Low risk	Low risk	Low risk	Low risk	Low risk	5	Short	1150	239	0.214825914	0.163471393
2	59. Marzetti et al 2014	RCT	Rotator cuff - subacromial impingement	Disability	Constant-murley score	Multiple exercise types	Resistance	Flexibility, Resistance	Concentric and eccentric	concentric and eccentric, dynamic, static	24	62.1	12.5	61.4	NR	NA	Supervised	Clinic	Low risk	Low risk	Low risk	Low risk	Low risk	Low risk	Low risk	12	Short	1150	240	0.214825914	0.163471393
2	59. Marzetti et al 2014	RCT	Rotator cuff - subacromial impingement	Disability	Constant-murley score	Multiple exercise types	Resistance	Flexibility, Resistance	Concentric and eccentric	concentric and eccentric, dynamic, static	24	62.1	12.5	61.4	NR	NA	Supervised	Clinic	Low risk	Low risk	Low risk	Low risk	Low risk	Low risk	Low risk	24	Medium	1150	241	0.331557804	0.168128921
2	59. Marzetti et al 2014	RCT	Rotator cuff - subacromial impingement	Pain	VAS- rest	Multiple exercise types	Resistance	Flexibility, Resistance	Concentric and eccentric	concentric and eccentric, dynamic, static	24	62.1	12.5	61.4	NR	NA	Supervised	Clinic	Low risk	Low risk	Low risk	Low risk	Low risk	Low risk	Low risk	5	Short	1151	242	-0.070708094	0.160394635
2	59. Marzetti et al 2014	RCT	Rotator cuff - subacromial impingement	Pain	VAS- rest	Multiple exercise types	Resistance	Flexibility, Resistance	Concentric and eccentric	concentric and eccentric, dynamic, static	24	62.1	12.5	61.4	NR	NA	Supervised	Clinic	Low risk	Low risk	Low risk	Low risk	Low risk	Low risk	Low risk	12	Short	1151	243	-0.03142582	0.160091497
2	59. Marzetti et al 2014	RCT	Rotator cuff - subacromial impingement	Pain	VAS- rest	Multiple exercise types	Resistance	Flexibility, Resistance	Concentric and eccentric	concentric and eccentric, dynamic, static	24	62.1	12.5	61.4	NR	NA	Supervised	Clinic	Low risk	Low risk	Low risk	Low risk	Low risk	Low risk	Low risk	24	Medium	1151	244	0.039282275	0.160133504
2	59. Marzetti et al 2014	RCT	Rotator cuff - subacromial impingement	Pain	VAS- movement	Multiple exercise types	Resistance	Flexibility, Resistance	Concentric and eccentric	concentric and eccentric, dynamic, static	24	62.1	12.5	61.4	NR	NA	Supervised	Clinic	Low risk	Low risk	Low risk	Low risk	Low risk	Low risk	Low risk	5	Short	1152	245	0.472005725	0.176068743
2	59. Marzetti et al 2014	RCT	Rotator cuff - subacromial impingement	Pain	VAS- movement	Multiple exercise types	Resistance	Flexibility, Resistance	Concentric and eccentric	concentric and eccentric, dynamic, static	24	62.1	12.5	61.4	NR	NA	Supervised	Clinic	Low risk	Low risk	Low risk	Low risk	Low risk	Low risk	Low risk	12	Short	1152	246	0.599372349	0.185214789
2	59. Marzetti et al 2014	RCT	Rotator cuff - subacromial impingement	Pain	VAS- movement	Multiple exercise types	Resistance	Flexibility, Resistance	Concentric and eccentric	concentric and eccentric, dynamic, static	24	62.1	12.5	61.4	NR	NA	Supervised	Clinic	Low risk	Low risk	Low risk	Low risk	Low risk	Low risk	Low risk	24	Medium	1152	247	0.760453668	0.19901914
2	59. Marzetti et al 2014	RCT	Rotator cuff - subacromial impingement	Disability	ASES	Multiple exercise types	Resistance	Flexibility, Resistance	Concentric and eccentric	concentric and eccentric, dynamic, static	24	62.1	12.5	61.4	NR	NA	Supervised	Clinic	Low risk	Low risk	Low risk	Low risk	Low risk	Low risk	Low risk	5	Short	1153	248	0.194971895	0.162867677
2	59. Marzetti et al 2014	RCT	Rotator cuff - subacromial impingement	Disability	ASES	Multiple exercise types	Resistance	Flexibility, Resistance	Concentric and eccentric	concentric and eccentric, dynamic, static	24	62.1	12.5	61.4	NR	NA	Supervised	Clinic	Low risk	Low risk	Low risk	Low risk	Low risk	Low risk	Low risk	12	Short	1153	249	0.268150323	0.165367886
2	59. Marzetti et al 2014	RCT	Rotator cuff - subacromial impingement	Disability	ASES	Multiple exercise types	Resistance	Flexibility, Resistance	Concentric and eccentric	concentric and eccentric, dynamic, static	24	62.1	12.5	61.4	NR	NA	Supervised	Clinic	Low risk	Low risk	Low risk	Low risk	Low risk	Low risk	Low risk	24	Medium	1153	250	0.375615147	0.170357795
2	6. Arias-Buria et al 2017	RCT	Rotator cuff - subacromial impingement	Pain	NPRS- mean intensity	Exercise only	Resistance	Resistance	Concentric and eccentric	concentric and eccentric	25	48.5	5.5	26	NA	NA	Unsupervised	Home	Low risk	Low risk	Unclear	Low risk	Unclear	Low risk	High risk	1	Short	1154	251	0.387368421	0.167392388
2	6. Arias-Buria et al 2017	RCT	Rotator cuff - subacromial impingement	Pain	NPRS- mean intensity	Exercise only	Resistance	Resistance	Concentric and eccentric	concentric and eccentric	25	48.5	5.5	26	NA	NA	Unsupervised	Home	Low risk	Low risk	Unclear	Low risk	Unclear	Low risk	High risk	13.03572857	Medium	1154	252	2.065964912	0.350911894
2	6. Arias-Buria et al 2017	RCT	Rotator cuff - subacromial impingement	Pain	NPRS- mean intensity	Exercise only	Resistance	Resistance	Concentric and eccentric	concentric and eccentric	25	48.5	5.5	26	NA	NA	Unsupervised	Home	Low risk	Low risk	Unclear	Low risk	Unclear	Low risk	High risk	26.07145714	Medium	1154	253	2.905263158	0.468518589
2	6. Arias-Buria et al 2017	RCT	Rotator cuff - subacromial impingement	Pain	NPRS- mean intensity	Exercise only	Resistance	Resistance	Concentric and eccentric	concentric and eccentric	25	48.5	5.5	26	NA	NA	Unsupervised	Home	Low risk	Low risk	Unclear	Low risk	Unclear	Low risk	High risk	52.14291429	Medium	1154	254	3.228070175	0.515014496
2	6. Arias-Buria et al 2017	RCT	Rotator cuff - subacromial impingement	Pain	NPRS- worst pain past week	Exercise only	Resistance	Resistance	Concentric and eccentric	concentric and eccentric	25	48.5	5.5	26	NA	NA	Unsupervised	Home	Low risk	Low risk	Unclear	Low risk	Unclear	Low risk	High risk	1	Short	1155	255	3.596992481	0.568680428
2	6. Arias-Buria et al 2017	RCT	Rotator cuff - subacromial impingement	Pain	NPRS- worst pain past week	Exercise only	Resistance	Resistance	Concentric and eccentric	concentric and eccentric	25	48.5	5.5	26	NA	NA	Unsupervised	Home	Low risk	Low risk	Unclear	Low risk	Unclear	Low risk	High risk	13.03572857	Medium	1155	256	6.22556391	0.959039824
2	6. Arias-Buria et al 2017	RCT	Rotator cuff - subacromial impingement	Disability	DASH	Exercise only	Resistance	Resistance	Concentric and eccentric	concentric and eccentric	25	48.5	5.5	26	NA	NA	Unsupervised	Home	Low risk	Low risk	Unclear	Low risk	Unclear	Low risk	High risk	1	Short	1156	257	2.175958415	0.365945435
2	6. Arias-Buria et al 2017	RCT	Rotator cuff - subacromial impingement	Disability	DASH	Exercise only	Resistance	Resistance	Concentric and eccentric	concentric and eccentric	25	48.5	5.5	26	NA	NA	Unsupervised	Home	Low risk	Low risk	Unclear	Low risk	Unclear	Low risk	High risk	13.03572857	Medium	1156	258	3.371539961	0.535826123
2	6. Arias-Buria et al 2017	RCT	Rotator cuff - subacromial impingement	Disability	DASH	Exercise only	Resistance	Resistance	Concentric and eccentric	concentric and eccentric	25	48.5	5.5	26	NA	NA	Unsupervised	Home	Low risk	Low risk	Unclear	Low risk	Unclear	Low risk	High risk	26.07145714	Medium	1156	259	4.196491228	0.656744235
2	6. Arias-Buria et al 2017	RCT	Rotator cuff - subacromial impingement	Disability	DASH	Exercise only	Resistance	Resistance	Concentric and eccentric	concentric and eccentric	25	48.5	5.5	26	NA	NA	Unsupervised	Home	Low risk	Low risk	Unclear	Low risk	Unclear	Low risk	High risk	52.14291429	Medium	1156	260	5.559454191	0.859325137
2	101. Valles-Carrascosa et al 2018	RCT	Rotator cuff - subacromial impingement	Pain	VAS- activity	Multiple exercise types	Resistance	Flexibility, Resistance	Eccentric only	Eccentric Only, Static	11	59	48.50, 70	54	26.69	NA	Supervised	NA	Low risk	Low risk	Low risk	High risk	Low risk	Low risk	High risk	4	Short	1157	261	1.596064793	0.473185309
2	101. Valles-Carrascosa et al 2018	RCT	Rotator cuff - subacromial impingement	ROM - Shoulder	ROM- flexion	Multiple exercise types	Resistance	Flexibility, Resistance	Eccentric only	Eccentric Only, Static	11	59	48.50, 70	54	26.69	NA	Supervised	NA	Low risk	Low risk	Low risk	High risk	Low risk	Low risk	High risk	4	Short	1158	262	1.342145547	0.418740597
2	101. Valles-Carrascosa et al 2018	RCT	Rotator cuff - subacromial impingement	ROM - Shoulder	ROM- extension	Multiple exercise types	Resistance	Flexibility, Resistance	Eccentric only	Eccentric Only, Static	11	59	48.50, 70	54	26.69	NA	Supervised	NA	Low risk	Low risk	Low risk	High risk	Low risk	Low risk	High risk	4	Short	1159	263	0.483656295	0.270779494
2	101. Valles-Carrascosa et al 2018	RCT	Rotator cuff - subacromial impingement	ROM - Shoulder	ROM- abduction	Multiple exercise types	Resistance	Flexibility, Resistance	Eccentric only	Eccentric Only, Static	11	59	48.50, 70	54	26.69	NA	Supervised	NA	Low risk	Low risk	Low risk	High risk	Low risk	Low risk	High risk	4	Short	1160	264	1.015677784	0.353894619
2	101. Valles-Carrascosa et al 2018	RCT	Rotator cuff - subacromial impingement	ROM - Shoulder	ROM- adduction	Multiple exercise types	Resistance	Flexibility, Resistance	Eccentric only	Eccentric Only, Static	11	59	48.50, 70	54	26.69	NA	Supervised	NA	Low risk	Low risk	Low risk	High risk	Low risk	Low risk	High risk	4	Short	1161	265	0.634798751	0.290386865
2	101. Valles-Carrascosa et al 2018	RCT	Rotator cuff - subacromial impingement	ROM - Shoulder	ROM- ext rotation	Multiple exercise types	Resistance	Flexibility, Resistance	Eccentric only	Eccentric Only, Static	11	59	48.50, 70	54	26.69	NA	Supervised	NA	Low risk	Low risk	Low risk	High risk	Low risk	Low risk	High risk	4	Short	1162	266	4.352904476	1.136390353
2	101. Valles-Carrascosa et al 2018	RCT	Rotator cuff - subacromial impingement	ROM - Shoulder	ROM- int rotation	Multiple exercise types	Resistance	Flexibility, Resistance	Eccentric only	Eccentric Only, Static	11	59	48.50, 70	54	26.69	NA	Supervised	NA	Low risk	Low risk	Low risk	High risk	Low risk	Low risk	High risk	4	Short	1163	267	2.343871641	0.644729468
2	101. Valles-Carrascosa et al 2018	RCT	Rotator cuff - subacromial impingement	Disability	Constant-murley score	Multiple exercise types	Resistance	Flexibility, Resistance	Eccentric only	Eccentric Only, Static	11	59	48.50, 70	54	26.69	NA	Supervised	NA	Low risk	Low risk	Low risk	High risk	Low risk	Low risk	High risk	4	Short	1164	268	1.356339958	0.421707018
2	95. Steunebrink et al 2013	RCT	Patellar	Disability	VISA-P	Exercise only	Resistance	Resistance	Resistance	Eccentric Only	16	32.9	10	24.2	NA	NA	Unsupervised	Home	Low risk	Low risk	Low risk	Low risk	Low risk	Unclear	Low risk	6	Short	1165	269	0.057875155	0.197770349
2	95. Steunebrink et al 2013	RCT	Patellar	Disability	VISA-P	Exercise only	Resistance	Resistance	Resistance	Eccentric Only	16	32.9	10	24.2	NA	NA	Unsupervised	Home	Low risk	Low risk	Low risk	Low risk	Low risk	Unclear	Low risk	12	Short	1165	270	0.57875155	0.228490363
2	95. Steunebrink et al 2013	RCT	Patellar	Disability	VISA-P	Exercise only	Resistance	Resistance	Resistance	Eccentric Only	16	32.9	10	24.2	NA	NA	Unsupervised	Home	Low risk	Low risk	Low risk	Low risk	Low risk	Unclear	Low risk	24	Medium	1165	271	0.69450186	0.240889452
2	95. Steunebrink et al 2013	RCT	Patellar	Pain	VAS- sports	Exercise only	Resistance	Resistance	Resistance	Eccentric Only	16	32.9	10	24.2	NA	NA	Unsupervised	Home	Low risk	Low risk	Low risk	Low risk	Low risk	Unclear	Low risk	6	Short	1166	272	-0.589129164	0.229535284
2	95. Steunebrink et al 2013	RCT	Patellar	Pain	VAS- sports	Exercise only	Resistance	Resistance	Resistance	Eccentric Only	16	32.9	10	24.2	NA	NA	Unsupervised	Home	Low risk	Low risk	Low risk	Low risk	Low risk	Unclear	Low risk	24	Medium	1166	273	-0.556399766	0.226287213
2	70. Pearson et al 2018	RCT	Patellar	Pain	Change in pain with SLDS	Exercise only	Resistance	Resistance	Isometric	Short duration isometric	8	28	4.25	0	NA	NA	Unsupervised	Home	Low risk	Low risk	High risk	Low risk	Low risk	Low risk	High risk	4	Short	1167	274	0.464235322	0.32533789
2	70. Pearson et al 2018	RCT	Patellar	Pain	Change in pain with SL hop	Exercise only	Resistance	Resistance	Isometric	Short duration isometric	8	28	4.25	0	NA	NA	Unsupervised	Home	Low risk	Low risk	High risk	Low risk	Low risk	Low risk	High risk	4	Short	1168	275	0.871375412	0.404449602
2	66. Osteras et al 2010	RCT	Rotator cuff - subacromial impingement	Pain	VAS- rest	Multiple exercise types	Resistance	Flexibility, Resistance	Concentric and eccentric	Concentric and eccentric, Isokinetic, Dynamic,	31	43.99	13	20.5	25.85	4.19	Supervised	Fitness Facility	Low risk	Low risk	High risk	High risk	Low risk	Unclear	High risk	13.03572857	Medium	1169	276	2.003734827	0.303853633
2	66. Osteras et al 2010	RCT	Rotator cuff - subacromial impingement	Pain	VAS- rest	Multiple exercise types	Resistance	Flexibility, Resistance	Concentric and eccentric	Concentric and eccentric, Isokinetic, Dynamic,	31	43.99	13	20.5	25.85	4.19	Supervised	Fitness Facility	Low risk	Low risk	High risk	High risk	Low risk	Unclear	High risk	39.10718571	Medium	1169	277	2.545284781	0.3699824
2	66. Osteras et al 2010	RCT	Rotator cuff - subacromial impingement	Pain	VAS- rest	Multiple exercise types	Resistance	Flexibility, Resistance	Concentric and eccentric	Concentric and eccentric, Isokinetic, Dynamic,	31	43.99	13	20.5	25.85	4.19	Supervised	Fitness Facility	Low risk	Low risk	High risk	High risk	Low risk	Unclear	High risk	65.17864286	Long	1169	278	2.491129785	0.363254117
2	66. Osteras et al 2010	RCT	Rotator cuff - subacromial impingement	Disability	SRQ	Multiple exercise types	Resistance	Flexibility, Resistance	Concentric and eccentric	Concentric and eccentric, Isokinetic, Dynamic,	31	43.99	13	20.5	25.85	4.19	Supervised	Fitness Facility	Low risk	Low risk	High risk	High risk	Low risk	Unclear	High risk	13.03572857	Medium	1170	279	2.191120696	0.326412546
2	66. Osteras et al 2010	RCT	Rotator cuff - subacromial impingement	Disability	SRQ	Multiple exercise types	Resistance	Flexibility, Resistance	Concentric and eccentric	Concentric and eccentric, Isokinetic, Dynamic,	31	43.99	13	20.5	25.85	4.19	Supervised	Fitness Facility	Low risk	Low risk	High risk	High risk	Low risk	Unclear	High risk	39.10718571	Medium	1170	280	2.855358072	0.408872716
2	66. Osteras et al 2010	RCT	Rotator cuff - subacromial impingement	Disability	SRQ	Multiple exercise types	Resistance	Flexibility, Resistance	Concentric and eccentric	Concentric and eccentric, Isokinetic, Dynamic,	31	43.99	13	20.5	25.85	4.19	Supervised	Fitness Facility	Low risk	Low risk	High risk	High risk	Low risk	Unclear	High risk	65.17864286	Long	1170	281	3.053766639	0.434031726
2	12. Beyer et al 2015	RCT	Achilles	Pain	VAS- running	Exercise only	Resistance	Resistance	Eccentric only	Eccentric Only	30	48	1.98	31.9	25.47	1.11	Unsupervised	Home	Low risk	Low risk	Low risk	Low risk	Low risk	Low risk	High risk	12	Short	1171	282	0.937550918	0.192018215
2	12. Beyer et al 2015	RCT	Achilles	Pain	VAS- running	Exercise only	Resistance	Resistance	Eccentric only	Eccentric Only	30	48	1.98	31.9	25.47	1.11	Unsupervised	Home	Low risk	Low risk	Low risk	Low risk	Low risk	Low risk	High risk	52	Medium	1171	283	1.196185654	0.217318594
2	12. Beyer et al 2015	RCT	Achilles	Pain	VAS- heel raise	Exercise only	Resistance	Resistance	Eccentric only	Eccentric Only	30	48	1.98	31.9	25.47	1.11	Unsupervised	Home	Low risk	Low risk	Low risk	Low risk	Low risk	Low risk	High risk	12	Short	1172	284	0.248935933	0.146759198
2	12. Beyer et al 2015	RCT	Achilles	Pain	VAS- heel raise	Exercise only	Resistance	Resistance	Eccentric only	Eccentric Only	30	48	1.98	31.9	25.47	1.11	Unsupervised	Home	Low risk	Low risk	Low risk	Low risk	Low risk	Low risk	High risk	52	Medium	1172	285	-0.355622762	0.150826601
2	12. Beyer et al 2015	RCT	Achilles	Disability	VISA-A	Exercise only	Resistance	Resistance	Eccentric only	Eccentric Only	30	48	1.98	31.9	25.47	1.11	Unsupervised	Home	Low risk	Low risk	Low risk	Low risk	Low risk	Low risk	High risk	12	Short	1174	286	0.638297265	0.167395292
2	12. Beyer et al 2015	RCT	Achilles	Disability	VISA-A	Exercise only	Resistance	Resistance	Eccentric only	Eccentric Only	30	48	1.98	31.9	25.47	1.11	Unsupervised	Home	Low risk	Low risk	Low risk	Low risk	Low risk	Low risk	High risk	52	Medium	1174	287	1.185409207	0.216207609
2	62. Mulligan et al 2016	RCT	Rotator cuff - subacromial impingement	Pain	NPRS- activity	Multiple exercise types	Resistance	Proprioception, Resistance	Concentric and eccentric	Concentric and eccentric, Movement pattern retraining	25	50.1	10.74	65	28.75	6.18	Unsupervised	Home	Low risk	Low risk	Low risk	Low risk	Low risk	Unclear	High risk	4	Short	1175	288	0.611634349	0.182195001
2	62. Mulligan et al 2016	RCT	Rotator cuff - subacromial impingement	Pain	NPRS- activity	Multiple exercise types	Resistance	Proprioception, Resistance	Concentric and eccentric	Concentric and eccentric, Movement pattern retraining	25	50.1	10.74	65	28.75	6.18	Unsupervised	Home	Low risk	Low risk	Low risk	Low risk	Low risk	Unclear	High risk	8	Short	1175	289	0.917451524	0.209751919
2	62. Mulligan et al 2016	RCT	Rotator cuff - subacromial impingement	Pain	NPRS- activity	Multiple exercise types	Resistance	Proprioception, Resistance	Concentric and eccentric	Concentric and eccentric, Movement pattern retraining	25	50.1	10.74	65	28.75	6.18	Unsupervised	Home	Low risk	Low risk	Low risk	Low risk	Low risk	Unclear	High risk	16	Medium	1175	290	1.325207756	0.255181364
2	62. Mulligan et al 2016	RCT	Rotator cuff - subacromial impingement	Disability	ASES	Multiple exercise types	Resistance	Proprioception, Resistance	Concentric and eccentric	Concentric and eccentric, Movement pattern retraining	25	50.1	10.74	65	28.75	6.18	Unsupervised	Home	Low risk	Low risk	Low risk	Low risk	Low risk	Unclear	High risk	4	Short	1176	291	0.504864056	0.174475204
2	62. Mulligan et al 2016	RCT	Rotator cuff - subacromial impingement	Disability	ASES	Multiple exercise types	Resistance	Proprioception, Resistance	Concentric and eccentric	Concentric and eccentric, Movement pattern retraining	25	50.1	10.74	65	28.75	6.18	Unsupervised	Home	Low risk	Low risk	Low risk	Low risk	Low risk	Unclear	High risk	8	Short	1176	292	0.784834123	0.196930329
2	62. Mulligan et al 2016	RCT	Rotator cuff - subacromial impingement	Disability	ASES	Multiple exercise types	Resistance	Proprioception, Resistance	Concentric and eccentric	Concentric and eccentric, Movement pattern retraining	25	50.1	10.74	65	28.75	6.18	Unsupervised	Home	Low risk	Low risk	Low risk	Low risk	Low risk	Unclear	High risk	16	Medium	1176	293	0.821551509	0.200359415
2	28. Dupuis et al 2018	RCT	Rotator cuff - subacromial impingement	Disability	DASH	Exercise only	Flexibility	Flexibility	Static	Static	23	33.3	11.7	55.8	NA	NA	Unsupervised	Home	Low risk	Low risk	High risk	Low risk	Low risk	Low risk	High risk	2	Short	1177	294	0.700473293	0.198081092
2	28. Dupuis et al 2018	RCT	Rotator cuff - subacromial impingement	Disability	DASH	Exercise only	Flexibility	Flexibility	Static	Static	23	33.3	11.7	55.8	NA	NA	Unsupervised	Home	Low risk	Low risk	High risk	Low risk	Low risk	Low risk	High risk	6	Short	1177	295	0.990759522	0.227439153
2	28. Dupuis et al 2018	RCT	Rotator cuff - subacromial impingement	Disability	WORC	Exercise only	Flexibility	Flexibility	Static	Static	23	33.3	11.7	55.8	NA	NA	Unsupervised	Home	Low risk	Low risk	High risk	Low risk	Low risk	Low risk	High risk	2	Short	1178	296	0.852216749	0.212676846
2	28. Dupuis et al 2018	RCT	Rotator cuff - subacromial impingement	Disability	WORC	Exercise only	Flexibility	Flexibility	Static	Static	23	33.3	11.7	55.8	NA	NA	Unsupervised	Home	Low risk	Low risk	High risk	Low risk	Low risk	Low risk	High risk	6	Short	1178	297	1.24137931	0.256833537
2	28. Dupuis et al 2018	RCT	Rotator cuff - subacromial impingement	Disability	BPI	Exercise only	Flexibility	Flexibility	Static	Static	23	33.3	11.7	55.8	NA	NA	Unsupervised	Home	Low risk	Low risk	High risk	Low risk	Low risk	Low risk	High risk	2	Short	1179	298	0.603448276	0.189781142
2	28. Dupuis et al 2018	RCT	Rotator cuff - subacromial impingement	Disability	BPI	Exercise only	Flexibility	Flexibility	Static	Static	23	33.3	11.7	55.8	NA	NA	Unsupervised	Home	Low risk	Low risk	High risk	Low risk	Low risk	Low risk	High risk	6	Short	1179	299	0.603448276	0.189781142
2	28. Dupuis et al 2018	RCT	Rotator cuff - subacromial impingement	Physical function capacity	Strength- abduction	Exercise only	Flexibility	Flexibility	Static	Static	23	33.3	11.7	55.8	NA	NA	Unsupervised	Home	Low risk	Low risk	High risk	Low risk	Low risk	Low risk	High risk	2	Short	1180	300	0.203120342	0.166735138
2	28. Dupuis et al 2018	RCT	Rotator cuff - subacromial impingement	Physical function capacity	Strength- ext rotation	Exercise only	Flexibility	Flexibility	Static	Static	23	33.3	11.7	55.8	NA	NA	Unsupervised	Home	Low risk	Low risk	High risk	Low risk	Low risk	Low risk	High risk	2	Short	1181	301	0.116219668	0.164603951
2	28. Dupuis et al 2018	RCT	Rotator cuff - subacromial impingement	ROM - Shoulder	ROM- flexion	Exercise only	Flexibility	Flexibility	Static	Static	23	33.3	11.7	55.8	NA	NA	Unsupervised	Home	Low risk	Low risk	High risk	Low risk	Low risk	Low risk	High risk	2	Short	1182	302	0.05478112	0.16378988
2	28. Dupuis et al 2018	RCT	Rotator cuff - subacromial impingement	ROM - Shoulder	ROM- ext rotation	Exercise only	Flexibility	Flexibility	Static	Static	23	33.3	11.7	55.8	NA	NA	Unsupervised	Home	Low risk	Low risk	High risk	Low risk	Low risk	Low risk	High risk	2	Short	1183	303	0.006072435	0.163559472
2	28. Dupuis et al 2018	RCT	Rotator cuff - subacromial impingement	ROM - Shoulder	ROM- ext rotation 90	Exercise only	Flexibility	Flexibility	Static	Static	23	33.3	11.7	55.8	NA	NA	Unsupervised	Home	Low risk	Low risk	High risk	Low risk	Low risk	Low risk	High risk	2	Short	1184	304	0.278514589	0.169483363
2	28. Dupuis et al 2018	RCT	Rotator cuff - subacromial impingement	ROM - Shoulder	ROM- int rotation 90	Exercise only	Flexibility	Flexibility	Static	Static	23	33.3	11.7	55.8	NA	NA	Unsupervised	Home	Unclear	Unclear	Unclear	Unclear	Low risk	Unclear	Unclear	2	Short	1185	305	-0.078588613	0.16403634
2	104. Visnes et al 2005	RCT	Patellar	Disability	VISA	Exercise only	Resistance	Resistance	Eccentric only	Eccentric only, concentric and eccentric	13	26.58	NA	38.5	NA	NA	Unsupervised	Home	Low risk	Low risk	High risk	Low risk	Unclear	Unclear	Unclear	1	Short	1186	306	0.643924105	0.26452919
2	104. Visnes et al 2005	RCT	Patellar	Disability	VISA	Exercise only	Resistance	Resistance	Eccentric only	Eccentric only, concentric and eccentric	13	26.58	NA	38.5	NA	NA	Unsupervised	Home	Unclear	Unclear	High risk	Low risk	High risk	Unclear	High risk	2	Short	1186	307	0.758168705	0.279743978
2	104. Visnes et al 2005	RCT	Patellar	Disability	VISA	Exercise only	Resistance	Resistance	Eccentric only	Eccentric only, concentric and eccentric	13	26.58	NA	38.5	NA	NA	Unsupervised	Home	Unclear	Unclear	High risk	Low risk	High risk	Unclear	High risk	3	Short	1186	308	0.789326323	0.284164315
2	104. Visnes et al 2005	RCT	Patellar	Disability	VISA	Exercise only	Resistance	Resistance	Eccentric only	Eccentric only, concentric and eccentric	13	26.58	NA	38.5	NA	NA	Unsupervised	Home	Unclear	Unclear	High risk	Low risk	High risk	Unclear	High risk	4	Short	1186	309	0.498521888	0.247765994
2	104. Visnes et al 2005	RCT	Patellar	Disability	VISA	Exercise only	Resistance	Resistance	Eccentric only	Eccentric only, concentric and eccentric	13	26.58	NA	38.5	NA	NA	Unsupervised	Home	Unclear	Unclear	High risk	Low risk	High risk	Unclear	High risk	5	Short	1186	310	0.405049034	0.238792047
2	104. Visnes et al 2005	RCT	Patellar	Disability	VISA	Exercise only	Resistance	Resistance	Eccentric only	Eccentric only, concentric and eccentric	13	26.58	NA	38.5	NA	NA	Unsupervised	Home	Unclear	Unclear	High risk	Low risk	High risk	Unclear	High risk	6	Short	1186	311	0.207717453	0.225323017
2	104. Visnes et al 2005	RCT	Patellar	Disability	VISA	Exercise only	Resistance	Resistance	Eccentric only	Eccentric only, concentric and eccentric	13	26.58	NA	38.5	NA	NA	Unsupervised	Home	Unclear	Unclear	High risk	Low risk	High risk	Unclear	High risk	7	Short	1186	312	0.103858727	0.22157963
2	104. Visnes et al 2005	RCT	Patellar	Disability	VISA	Exercise only	Resistance	Resistance	Eccentric only	Eccentric only, concentric and eccentric	13	26.58	NA	38.5	NA	NA	Unsupervised	Home	Unclear	Unclear	High risk	Low risk	High risk	Unclear	High risk	8	Short	1186	313	0.31157618	0.231427478
2	104. Visnes et al 2005	RCT	Patellar	Disability	VISA	Exercise only	Resistance	Resistance	Eccentric only	Eccentric only, concentric and eccentric	13	26.58	NA	38.5	NA	NA	Unsupervised	Home	Unclear	Unclear	High risk	Low risk	High risk	Unclear	High risk	9	Short	1186	314	0.477750143	0.245641239
2	104. Visnes et al 2005	RCT	Patellar	Disability	VISA	Exercise only	Resistance	Resistance	Eccentric only	Eccentric only, concentric and eccentric	13	26.58	NA	38.5	NA	NA	Unsupervised	Home	Unclear	Unclear	High risk	Low risk	High risk	Unclear	High risk	10	Short	1186	315	0.830869813	0.290222417
2	104. Visnes et al 2005	RCT	Patellar	Disability	VISA	Exercise only	Resistance	Resistance	Eccentric only	Eccentric only, concentric and eccentric	13	26.58	NA	38.5	NA	NA	Unsupervised	Home	Unclear	Unclear	High risk	Low risk	High risk	Unclear	High risk	11	Short	1186	316	0.602380614	0.259420518
2	104. Visnes et al 2005	RCT	Patellar	Disability	VISA	Exercise only	Resistance	Resistance	Eccentric only	Eccentric only, concentric and eccentric	13	26.58	NA	38.5	NA	NA	Unsupervised	Home	Unclear	Unclear	High risk	Low risk	High risk	Unclear	High risk	12	Short	1186	317	0.571222996	0.25575104
2	104. Visnes et al 2005	RCT	Patellar	Disability	VISA	Exercise only	Resistance	Resistance	Eccentric only	Eccentric only, concentric and eccentric	13	26.58	NA	38.5	NA	NA	Unsupervised	Home	Unclear	Unclear	High risk	Low risk	High risk	Unclear	High risk	18	Medium	1186	318	0.488136015	0.246694602
2	104. Visnes et al 2005	RCT	Patellar	Disability	VISA	Exercise only	Resistance	Resistance	Eccentric only	Eccentric only, concentric and eccentric	13	26.58	NA	38.5	NA	NA	Unsupervised	Home	Unclear	Unclear	High risk	Low risk	High risk	Unclear	High risk	40	Medium	1186	319	1.038587266	0.322961615
2	104. Visnes et al 2005	RCT	Patellar	Physical function capacity	Countermovement jump	Exercise only	Resistance	Resistance	Eccentric only	Eccentric only, concentric and eccentric	13	26.58	NA	38.5	NA	NA	Unsupervised	Home	Unclear	Unclear	High risk	Low risk	High risk	Unclear	High risk	17	Medium	1187	320	0.150321887	0.222953096
2	104. Visnes et al 2005	RCT	Patellar	Physical function capacity	Standing jump	Exercise only	Resistance	Resistance	Eccentric only	Eccentric only, concentric and eccentric	13	26.58	NA	38.5	NA	NA	Unsupervised	Home	Unclear	Unclear	High risk	Low risk	High risk	Unclear	High risk	17	Medium	1188	321	0.113595521	0.221826491
2	23. De Vos et al 2007	RCT	Achilles	Disability	VISA-A	Exercise only	Resistance	Resistance	Eccentric only	Eccentric only	32	44.6	8	41.3	25.1	3.1	Unsupervised	Home	Low risk	Unclear	Low risk	Low risk	Unclear	Low risk	High risk	12	Short	1189	322	1.27122036	0.21745683
2	41. Juul-Kristensen et al 2019	RCT	Rotator cuff - subacromial impingement	Pain	NPRS- pain past 7 days	Multiple exercise types	Proprioception	Proprioception, Flexibility	Movement pattern retraining	Movement pattern retraining, static	26	42.9	12.4	51	25.3	3.9	Unsupervised	Home	Low risk	Low risk	Low risk	Low risk	Low risk	Unclear	Low risk	8	Short	1190	323	0.979834711	0.211621026
2	41. Juul-Kristensen et al 2019	RCT	Rotator cuff - subacromial impingement	Pain	NPRS- current pain	Multiple exercise types	Proprioception	Proprioception, Flexibility	Movement pattern retraining	Movement pattern retraining, static	26	42.9	12.4	51	25.3	3.9	Unsupervised	Home	Low risk	Low risk	Low risk	Low risk	Low risk	Unclear	Low risk	8	Short	1191	324	0.559779614	0.174656215
2	41. Juul-Kristensen et al 2019	RCT	Rotator cuff - subacromial impingement	Pain	NPRS- pain past 24h	Multiple exercise types	Proprioception	Proprioception, Flexibility	Movement pattern retraining	Movement pattern retraining, static	26	42.9	12.4	51	25.3	3.9	Unsupervised	Home	Low risk	Low risk	Low risk	Low risk	Low risk	Unclear	Low risk	8	Short	1192	325	0.916804408	0.205290207
2	41. Juul-Kristensen et al 2019	RCT	Rotator cuff - subacromial impingement	Disability	DASH total	Multiple exercise types	Proprioception	Proprioception, Flexibility	Movement pattern retraining	Movement pattern retraining, static	26	42.9	12.4	51	25.3	3.9	Unsupervised	Home	Low risk	Low risk	Low risk	Low risk	Low risk	Unclear	Low risk	8	Short	1193	326	0.625610948	0.179520771
2	41. Juul-Kristensen et al 2019	RCT	Rotator cuff - subacromial impingement	Disability	DASH- work	Multiple exercise types	Proprioception	Proprioception, Flexibility	Movement pattern retraining	Movement pattern retraining, static	26	42.9	12.4	51	25.3	3.9	Unsupervised	Home	Low risk	Low risk	Low risk	Low risk	Low risk	Unclear	Low risk	8	Short	1194	327	0.371349862	0.163190278
2	41. Juul-Kristensen et al 2019	RCT	Rotator cuff - subacromial impingement	Disability	DASH- sport	Multiple exercise types	Proprioception	Proprioception, Flexibility	Movement pattern retraining	Movement pattern retraining, static	26	42.9	12.4	51	25.3	3.9	Unsupervised	Home	Low risk	Low risk	Low risk	Low risk	Low risk	Unclear	Low risk	8	Short	1195	328	0.188051948	0.156099969
2	41. Juul-Kristensen et al 2019	RCT	Rotator cuff - subacromial impingement	Disability	OSS	Multiple exercise types	Proprioception	Proprioception, Flexibility	Movement pattern retraining	Movement pattern retraining, static	26	42.9	12.4	51	25.3	3.9	Unsupervised	Home	Low risk	Low risk	Low risk	Low risk	Low risk	Unclear	Low risk	8	Short	1196	329	0.671861472	0.183173717
2	96. Stevens et al 2014	RCT	Achilles	Disability	VISA-A	Exercise only	Resistance	Resistance	Eccentric only	Eccentric only	15	48.7	10.8	60.7	30.6	5.7	Unsupervised	Home	Unclear	Unclear	High risk	High risk	Unclear	Unclear	High risk	3	Short	1197	330	-0.79714795	0.262588943
2	96. Stevens et al 2014	RCT	Achilles	Disability	VISA-A	Exercise only	Resistance	Resistance	Eccentric only	Eccentric only	15	48.7	10.8	60.7	30.6	5.7	Unsupervised	Home	Unclear	Unclear	High risk	Unclear	Unclear	Unclear	High risk	6	Short	1197	331	0.843493761	0.268723416
2	96. Stevens et al 2014	RCT	Achilles	Pain	VAS- pain intensity	Exercise only	Resistance	Resistance	Eccentric only	Eccentric only	15	48.7	10.8	60.7	30.6	5.7	Unsupervised	Home	Low risk	Low risk	Low risk	Low risk	Low risk	Unclear	High risk	3	Short	1198	332	0.056727273	0.204578932
2	96. Stevens et al 2014	RCT	Achilles	Pain	VAS- pain intensity	Exercise only	Resistance	Resistance	Eccentric only	Eccentric only	15	48.7	10.8	60.7	30.6	5.7	Unsupervised	Home	Low risk	Low risk	Low risk	Low risk	Low risk	Unclear	High risk	6	Short	1198	333	0.743757576	0.255785982
2	56. Mafi et al 2001	RCT	Achilles	Pain	VAS- activity	Exercise only	Resistance	Resistance	Eccentric only	Eccentric only	22	48.25	8.8	45.45	NA	NA	Unsupervised	Home	Low risk	Unclear	Unclear	Unclear	Unclear	Unclear	High risk	12	Short	1199	334	2.824410698	0.491796431
2	64. Norregaard et al 2007	RCT	Achilles	Disability	KOOS- pain	Exercise only	Resistance	Resistance	Eccentric only	Eccentric Only	18	42	2	49	NA	NA	Unsupervised	Home	Low risk	Low risk	Unclear	Unclear	Unclear	Unclear	High risk	1	Short	1200	335	2.388059701	0.478551085
2	64. Norregaard et al 2007	RCT	Achilles	Disability	KOOS- pain	Exercise only	Resistance	Resistance	Eccentric only	Eccentric Only	14	42	2	49	NA	NA	Unsupervised	Home	Low risk	Low risk	Unclear	Unclear	Unclear	Unclear	High risk	3	Short	1200	336	2.039215686	0.48966361
2	64. Norregaard et al 2007	RCT	Achilles	Disability	KOOS- pain	Exercise only	Resistance	Resistance	Eccentric only	Eccentric Only	11	42	2	49	NA	NA	Unsupervised	Home	Low risk	Low risk	Unclear	Unclear	Unclear	Unclear	High risk	6	Short	1200	337	1.846153846	0.529090467
2	64. Norregaard et al 2007	RCT	Achilles	Disability	KOOS- pain	Exercise only	Resistance	Resistance	Eccentric only	Eccentric Only	13	42	2	49	NA	NA	Unsupervised	Home	Low risk	Low risk	Unclear	Unclear	Unclear	Unclear	High risk	12	Short	1200	338	1.872340426	0.479347506
2	64. Norregaard et al 2007	RCT	Achilles	Disability	KOOS- pain	Exercise only	Resistance	Resistance	Eccentric only	Eccentric Only	8	42	2	49	NA	NA	Unsupervised	Home	Low risk	Low risk	Unclear	Unclear	Unclear	Unclear	High risk	52	Medium	1200	339	0.888888889	0.408475965
2	64. Norregaard et al 2007	RCT	Achilles	Disability	KOOS- stiffness	Exercise only	Resistance	Resistance	Eccentric only	Eccentric Only	18	42	2	49	NA	NA	Unsupervised	Home	Low risk	Low risk	Unclear	Unclear	Unclear	Unclear	High risk	1	Short	1201	340	1.698175788	0.364479885
2	64. Norregaard et al 2007	RCT	Achilles	Disability	KOOS- stiffness	Exercise only	Resistance	Resistance	Eccentric only	Eccentric Only	14	42	2	49	NA	NA	Unsupervised	Home	Low risk	Low risk	Unclear	Unclear	Unclear	Unclear	High risk	3	Short	1201	341	1.568627451	0.400242452
2	64. Norregaard et al 2007	RCT	Achilles	Disability	KOOS- stiffness	Exercise only	Resistance	Resistance	Eccentric only	Eccentric Only	11	42	2	49	NA	NA	Unsupervised	Home	Low risk	Low risk	Unclear	Unclear	Unclear	Unclear	High risk	6	Short	1201	342	1.230769231	0.395843072
2	64. Norregaard et al 2007	RCT	Achilles	Disability	KOOS- stiffness	Exercise only	Resistance	Resistance	Eccentric only	Eccentric Only	13	42	2	49	NA	NA	Unsupervised	Home	Low risk	Low risk	Unclear	Unclear	Unclear	Unclear	High risk	12	Short	1201	343	1.456264775	0.397712658
2	64. Norregaard et al 2007	RCT	Achilles	Disability	KOOS- stiffness	Exercise only	Resistance	Resistance	Eccentric only	Eccentric Only	8	42	2	49	NA	NA	Unsupervised	Home	Low risk	Low risk	Unclear	Unclear	Unclear	Unclear	High risk	52	Medium	1201	344	0.888888889	0.408475965
2	64. Norregaard et al 2007	RCT	Achilles	Disability	KOOS- QoL	Exercise only	Resistance	Resistance	Eccentric only	Eccentric Only	18	42	2	49	NA	NA	Unsupervised	Home	Low risk	Low risk	Unclear	Unclear	Unclear	Unclear	High risk	1	Short	1202	345	3.275053305	0.632744634
2	64. Norregaard et al 2007	RCT	Achilles	Disability	KOOS- QoL	Exercise only	Resistance	Resistance	Eccentric only	Eccentric Only	14	42	2	49	NA	NA	Unsupervised	Home	Low risk	Low risk	Unclear	Unclear	Unclear	Unclear	High risk	3	Short	1202	346	3.361344538	0.757914204
2	64. Norregaard et al 2007	RCT	Achilles	Disability	KOOS- QoL	Exercise only	Resistance	Resistance	Eccentric only	Eccentric Only	11	42	2	49	NA	NA	Unsupervised	Home	Low risk	Low risk	Unclear	Unclear	Unclear	Unclear	High risk	6	Short	1202	347	2.769230769	0.746483715
2	64. Norregaard et al 2007	RCT	Achilles	Disability	KOOS- QoL	Exercise only	Resistance	Resistance	Eccentric only	Eccentric Only	13	42	2	49	NA	NA	Unsupervised	Home	Low risk	Low risk	Unclear	Unclear	Unclear	Unclear	High risk	12	Short	1202	348	2.94224924	0.704327524
2	64. Norregaard et al 2007	RCT	Achilles	Disability	KOOS- QoL	Exercise only	Resistance	Resistance	Eccentric only	Eccentric Only	8	42	2	49	NA	NA	Unsupervised	Home	Low risk	Low risk	Unclear	Unclear	Unclear	Unclear	High risk	52	Medium	1202	349	1.777777778	0.646932428
2	113. Young et al 2005	RCT	Patellar	Disability	VISA	Exercise only	Resistance	Resistance	Eccentric only	Eccentric only	9	27.3	1.8	23.5	NA	NA	NA	NA	Unclear	Unclear	High risk	Low risk	High risk	Unclear	High risk	12	Short	1203	350	1.74036192	0.581650309
2	113. Young et al 2005	RCT	Patellar	Disability	VISA	Exercise only	Resistance	Resistance	Eccentric only	Eccentric only	9	27.3	1.8	23.5	NA	NA	NA	NA	Low risk	Unclear	Unclear	Low risk	Low risk	Unclear	Low risk	52.14291429	Medium	1203	351	2.467348544	0.7789465
2	113. Young et al 2005	RCT	Patellar	Pain	VAS- activity	Exercise only	Resistance	Resistance	Eccentric only	Eccentric only	9	27.3	1.8	23.5	NA	NA	NA	NA	Low risk	Unclear	Unclear	Low risk	Low risk	Unclear	Low risk	12	Short	1204	352	0.833746898	0.365402643
2	113. Young et al 2005	RCT	Patellar	Pain	VAS- activity	Exercise only	Resistance	Resistance	Eccentric only	Eccentric only	9	27.3	1.8	23.5	NA	NA	NA	NA	Low risk	Unclear	Unclear	Low risk	Low risk	Unclear	Low risk	52.14291429	Medium	1204	353	1.279569892	0.464972648
2	88. Silbernagel et al 2007	RCT	Achilles	Disability	VISA-A	Multiple exercise types	Resistance	Flexibility, Plyometric, Resistance	Concentric and eccentric	concentric and eccentric, eccentric only, dynamic, plyometric	19	46	8	47.4	NA	NA	Unsupervised	Home	Low risk	Low risk	High risk	High risk	Low risk	Unclear	Low risk	6	Short	1205	354	0.788019255	0.228954722
2	88. Silbernagel et al 2007	RCT	Achilles	Disability	VISA-A	Multiple exercise types	Resistance	Flexibility, Plyometric, Resistance	Concentric and eccentric	concentric and eccentric, eccentric only, dynamic, plyometric	19	46	8	47.4	NA	NA	Unsupervised	Home	Low risk	Low risk	High risk	High risk	Low risk	Unclear	Low risk	13.03572857	Medium	1205	355	1.030486718	0.25788115
2	88. Silbernagel et al 2007	RCT	Achilles	Disability	VISA-A	Multiple exercise types	Resistance	Flexibility, Plyometric, Resistance	Concentric and eccentric	concentric and eccentric, eccentric only, dynamic, plyometric	19	46	8	47.4	NA	NA	Unsupervised	Home	Low risk	Low risk	High risk	High risk	Low risk	Unclear	Low risk	26.07145714	Medium	1205	356	1.394187912	0.307680895
2	88. Silbernagel et al 2007	RCT	Achilles	Disability	VISA-A	Multiple exercise types	Resistance	Flexibility, Plyometric, Resistance	Concentric and eccentric	concentric and eccentric, eccentric only, dynamic, plyometric	19	46	8	47.4	NA	NA	Unsupervised	Home	Low risk	Low risk	High risk	High risk	Low risk	Unclear	Low risk	52.14291429	Medium	1205	357	1.697272241	0.352976885
2	88. Silbernagel et al 2007	RCT	Achilles	Pain	VAS- hopping	Multiple exercise types	Resistance	Flexibility, Plyometric, Resistance	Concentric and eccentric	concentric and eccentric, eccentric only, dynamic, plyometric	19	46	8	47.4	NA	NA	Unsupervised	Home	Low risk	Low risk	High risk	High risk	Low risk	Unclear	Low risk	6	Short	1206	358	0.498028169	0.201268959
2	88. Silbernagel et al 2007	RCT	Achilles	Pain	VAS- hopping	Multiple exercise types	Resistance	Flexibility, Plyometric, Resistance	Concentric and eccentric	concentric and eccentric, eccentric only, dynamic, plyometric	19	46	8	47.4	NA	NA	Unsupervised	Home	Low risk	Low risk	High risk	High risk	Low risk	Unclear	Low risk	13.03572857	Medium	1206	359	0.842816901	0.235105179
2	88. Silbernagel et al 2007	RCT	Achilles	Pain	VAS- hopping	Multiple exercise types	Resistance	Flexibility, Plyometric, Resistance	Concentric and eccentric	concentric and eccentric, eccentric only, dynamic, plyometric	19	46	8	47.4	NA	NA	Unsupervised	Home	Low risk	Low risk	High risk	High risk	Low risk	Unclear	Low risk	26.07145714	Medium	1206	360	1.034366197	0.25837672
2	88. Silbernagel et al 2007	RCT	Achilles	Pain	VAS- hopping	Multiple exercise types	Resistance	Flexibility, Plyometric, Resistance	Concentric and eccentric	concentric and eccentric, eccentric only, dynamic, plyometric	19	46	8	47.4	NA	NA	Unsupervised	Home	Low risk	Low risk	High risk	High risk	Low risk	Unclear	Low risk	52.14291429	Medium	1206	361	1.149295775	0.273448261
2	88. Silbernagel et al 2007	RCT	Achilles	Physical function capacity	Endurance- toe raise	Multiple exercise types	Resistance	Flexibility, Plyometric, Resistance	Concentric and eccentric	concentric and eccentric, eccentric only, dynamic, plyometric	19	46	8	47.4	NA	NA	Unsupervised	Home	Low risk	Low risk	High risk	High risk	Low risk	Unclear	Low risk	6	Short	1207	362	0.526658892	0.203583346
2	88. Silbernagel et al 2007	RCT	Achilles	Physical function capacity	Endurance- toe raise	Multiple exercise types	Resistance	Flexibility, Plyometric, Resistance	Concentric and eccentric	concentric and eccentric, eccentric only, dynamic, plyometric	19	46	8	47.4	NA	NA	Unsupervised	Home	Low risk	Low risk	High risk	High risk	Low risk	Unclear	Low risk	13.03572857	Medium	1207	363	0.55512694	0.205984843
2	88. Silbernagel et al 2007	RCT	Achilles	Physical function capacity	Endurance- toe raise	Multiple exercise types	Resistance	Flexibility, Plyometric, Resistance	Concentric and eccentric	concentric and eccentric, eccentric only, dynamic, plyometric	19	46	8	47.4	NA	NA	Unsupervised	Home	Low risk	Low risk	High risk	High risk	Low risk	Unclear	Low risk	26.07145714	Medium	1207	364	0.571394396	0.207400679
2	88. Silbernagel et al 2007	RCT	Achilles	Physical function capacity	Endurance- toe raise	Multiple exercise types	Resistance	Flexibility, Plyometric, Resistance	Concentric and eccentric	concentric and eccentric, eccentric only, dynamic, plyometric	19	46	8	47.4	NA	NA	Unsupervised	Home	Low risk	Low risk	High risk	High risk	Low risk	Unclear	Low risk	52.14291429	Medium	1207	365	0.530725756	0.203920378
2	88. Silbernagel et al 2007	RCT	Achilles	Physical function capacity	Power- ecc conc toe raise	Multiple exercise types	Resistance	Flexibility, Plyometric, Resistance	Concentric and eccentric	concentric and eccentric, eccentric only, dynamic, plyometric	19	46	8	47.4	NA	NA	Unsupervised	Home	Low risk	Low risk	High risk	High risk	Low risk	Unclear	Low risk	6	Short	1208	366	0.281243014	0.187386627
2	88. Silbernagel et al 2007	RCT	Achilles	Physical function capacity	Power- ecc conc toe raise	Multiple exercise types	Resistance	Flexibility, Plyometric, Resistance	Concentric and eccentric	concentric and eccentric, eccentric only, dynamic, plyometric	19	46	8	47.4	NA	NA	Unsupervised	Home	Low risk	Low risk	High risk	High risk	Low risk	Unclear	Low risk	13.03572857	Medium	1208	367	0.608093002	0.210707143
2	88. Silbernagel et al 2007	RCT	Achilles	Physical function capacity	Power- ecc conc toe raise	Multiple exercise types	Resistance	Flexibility, Plyometric, Resistance	Concentric and eccentric	concentric and eccentric, eccentric only, dynamic, plyometric	19	46	8	47.4	NA	NA	Unsupervised	Home	Low risk	Low risk	High risk	High risk	Low risk	Unclear	Low risk	26.07145714	Medium	1208	368	0.585289515	0.208634511
2	88. Silbernagel et al 2007	RCT	Achilles	Physical function capacity	Power- ecc conc toe raise	Multiple exercise types	Resistance	Flexibility, Plyometric, Resistance	Concentric and eccentric	concentric and eccentric, eccentric only, dynamic, plyometric	19	46	8	47.4	NA	NA	Unsupervised	Home	Low risk	Low risk	High risk	High risk	Low risk	Unclear	Low risk	52.14291429	Medium	1208	369	0.174826738	0.183203952
2	88. Silbernagel et al 2007	RCT	Achilles	Physical function capacity	Power- conc toe raise	Multiple exercise types	Resistance	Flexibility, Plyometric, Resistance	Concentric and eccentric	concentric and eccentric, eccentric only, dynamic, plyometric	19	46	8	47.4	NA	NA	Unsupervised	Home	Low risk	Low risk	High risk	High risk	Low risk	Unclear	Low risk	6	Short	1209	370	0.255399061	0.186200966
2	88. Silbernagel et al 2007	RCT	Achilles	Physical function capacity	Power- conc toe raise	Multiple exercise types	Resistance	Flexibility, Plyometric, Resistance	Concentric and eccentric	concentric and eccentric, eccentric only, dynamic, plyometric	19	46	8	47.4	NA	NA	Unsupervised	Home	Low risk	Low risk	High risk	High risk	Low risk	Unclear	Low risk	13.03572857	Medium	1209	371	0.180907668	0.183392411
2	88. Silbernagel et al 2007	RCT	Achilles	Physical function capacity	Power- conc toe raise	Multiple exercise types	Resistance	Flexibility, Plyometric, Resistance	Concentric and eccentric	concentric and eccentric, eccentric only, dynamic, plyometric	19	46	8	47.4	NA	NA	Unsupervised	Home	Low risk	Low risk	High risk	High risk	Low risk	Unclear	Low risk	26.07145714	Medium	1209	372	0.234115806	0.185305298
2	88. Silbernagel et al 2007	RCT	Achilles	Physical function capacity	Power- conc toe raise	Multiple exercise types	Resistance	Flexibility, Plyometric, Resistance	Concentric and eccentric	concentric and eccentric, eccentric only, dynamic, plyometric	19	46	8	47.4	NA	NA	Unsupervised	Home	Low risk	Low risk	High risk	High risk	Low risk	Unclear	Low risk	52.14291429	Medium	1209	373	0.021283255	0.180560202
2	88. Silbernagel et al 2007	RCT	Achilles	Physical function capacity	Drop counter movement jump (height)	Multiple exercise types	Resistance	Flexibility, Plyometric, Resistance	Concentric and eccentric	concentric and eccentric, eccentric only, dynamic, plyometric	19	46	8	47.4	NA	NA	Unsupervised	Home	Low risk	Low risk	High risk	High risk	Low risk	Unclear	Low risk	6	Short	1210	374	-0.052825345	0.180766819
2	88. Silbernagel et al 2007	RCT	Achilles	Physical function capacity	Drop counter movement jump (height)	Multiple exercise types	Resistance	Flexibility, Plyometric, Resistance	Concentric and eccentric	concentric and eccentric, eccentric only, dynamic, plyometric	19	46	8	47.4	NA	NA	Unsupervised	Home	Low risk	Low risk	High risk	High risk	Low risk	Unclear	Low risk	13.03572857	Medium	1210	375	0.091870166	0.181265222
2	88. Silbernagel et al 2007	RCT	Achilles	Physical function capacity	Drop counter movement jump (height)	Multiple exercise types	Resistance	Flexibility, Plyometric, Resistance	Concentric and eccentric	concentric and eccentric, eccentric only, dynamic, plyometric	19	46	8	47.4	NA	NA	Unsupervised	Home	Low risk	Low risk	High risk	High risk	Low risk	Unclear	Low risk	26.07145714	Medium	1210	376	0.261829973	0.186486016
2	88. Silbernagel et al 2007	RCT	Achilles	Physical function capacity	Drop counter movement jump (height)	Multiple exercise types	Resistance	Flexibility, Plyometric, Resistance	Concentric and eccentric	concentric and eccentric, eccentric only, dynamic, plyometric	19	46	8	47.4	NA	NA	Unsupervised	Home	Low risk	Low risk	High risk	High risk	Low risk	Unclear	Low risk	52.14291429	Medium	1210	377	0.124024724	0.181875769
2	88. Silbernagel et al 2007	RCT	Achilles	Physical function capacity	Hopping (proportion)	Multiple exercise types	Resistance	Flexibility, Plyometric, Resistance	Concentric and eccentric	concentric and eccentric, eccentric only, dynamic, plyometric	19	46	8	47.4	NA	NA	Unsupervised	Home	Low risk	Low risk	High risk	High risk	Low risk	Unclear	Low risk	6	Short	1211	378	0.23943662	0.18552231
2	88. Silbernagel et al 2007	RCT	Achilles	Physical function capacity	Hopping (proportion)	Multiple exercise types	Resistance	Flexibility, Plyometric, Resistance	Concentric and eccentric	concentric and eccentric, eccentric only, dynamic, plyometric	19	46	8	47.4	NA	NA	Unsupervised	Home	Low risk	Low risk	High risk	High risk	Low risk	Unclear	Low risk	13.03572857	Medium	1211	379	0.309859155	0.188822623
2	88. Silbernagel et al 2007	RCT	Achilles	Physical function capacity	Hopping (proportion)	Multiple exercise types	Resistance	Flexibility, Plyometric, Resistance	Concentric and eccentric	concentric and eccentric, eccentric only, dynamic, plyometric	19	46	8	47.4	NA	NA	Unsupervised	Home	Low risk	Low risk	High risk	High risk	Low risk	Unclear	Low risk	26.07145714	Medium	1211	380	0.767605634	0.226729001
2	88. Silbernagel et al 2007	RCT	Achilles	Physical function capacity	Hopping (proportion)	Multiple exercise types	Resistance	Flexibility, Plyometric, Resistance	Concentric and eccentric	concentric and eccentric, eccentric only, dynamic, plyometric	19	46	8	47.4	NA	NA	Unsupervised	Home	Low risk	Low risk	High risk	High risk	Low risk	Unclear	Low risk	52.14291429	Medium	1211	381	0.507042254	0.2019865
2	88. Silbernagel et al 2007	RCT	Achilles	Physical function capacity	Counter movement jump (height)	Multiple exercise types	Resistance	Flexibility, Plyometric, Resistance	Concentric and eccentric	concentric and eccentric, eccentric only, dynamic, plyometric	19	46	8	47.4	NA	NA	Unsupervised	Home	Low risk	Low risk	High risk	High risk	Low risk	Unclear	Low risk	6	Short	1212	382	0.007850381	0.180525587
2	88. Silbernagel et al 2007	RCT	Achilles	Physical function capacity	Counter movement jump (height)	Multiple exercise types	Resistance	Flexibility, Plyometric, Resistance	Concentric and eccentric	concentric and eccentric, eccentric only, dynamic, plyometric	19	46	8	47.4	NA	NA	Unsupervised	Home	Low risk	Low risk	High risk	High risk	Low risk	Unclear	Low risk	13.03572857	Medium	1212	383	-0.00392519	0.180521498
2	88. Silbernagel et al 2007	RCT	Achilles	Physical function capacity	Counter movement jump (height)	Multiple exercise types	Resistance	Flexibility, Plyometric, Resistance	Concentric and eccentric	concentric and eccentric, eccentric only, dynamic, plyometric	19	46	8	47.4	NA	NA	Unsupervised	Home	Low risk	Low risk	High risk	High risk	Low risk	Unclear	Low risk	26.07145714	Medium	1212	384	0.017663357	0.180547732
2	88. Silbernagel et al 2007	RCT	Achilles	Physical function capacity	Counter movement jump (height)	Multiple exercise types	Resistance	Flexibility, Plyometric, Resistance	Concentric and eccentric	concentric and eccentric, eccentric only, dynamic, plyometric	19	46	8	47.4	NA	NA	Unsupervised	Home	Low risk	Low risk	High risk	High risk	Low risk	Unclear	Low risk	52.14291429	Medium	1212	385	0.027476333	0.180586907
2	3. Alfredson et al 1998	Quasi-experimental	Achilles	Physical function capacity	Dynamometer- concentric plantarflex torque	Exercise only	Resistance	Resistance	Eccentric only	eccentric only	15	44	7	20	NA	NA	Unsupervised	Home	High risk	Unclear	High risk	Unclear	Low risk	Unclear	High risk	12	Short	1213	386	0.299778271	0.2134637
2	3. Alfredson et al 1998	Quasi-experimental	Achilles	Physical function capacity	Dynamomter- eccentric plantarflex torque	Exercise only	Resistance	Resistance	Eccentric only	eccentric only	15	44	7	20	NA	NA	Unsupervised	Home	High risk	Unclear	High risk	Unclear	Low risk	Unclear	High risk	12	Short	1214	387	0.448020272	0.224317986
2	3. Alfredson et al 1998	Quasi-experimental	Achilles	Physical function capacity	Total work- concentric plantarflex	Exercise only	Resistance	Resistance	Eccentric only	eccentric only	15	44	7	20	NA	NA	Unsupervised	Home	High risk	Unclear	High risk	Unclear	Low risk	Unclear	High risk	12	Short	1215	388	0.334107997	0.215637527
2	3. Alfredson et al 1998	Quasi-experimental	Achilles	Physical function capacity	Total work- eccentric plantarflex torque	Exercise only	Resistance	Resistance	Eccentric only	eccentric only	15	44	7	20	NA	NA	Unsupervised	Home	High risk	Unclear	High risk	Unclear	Low risk	Unclear	High risk	12	Short	1216	389	0.051720708	0.204522042
2	2. Akkaya et al 2016	RCT	Rotator cuff - subacromial impingement	Pain	VAS- night pain	Exercise only	Flexibility	Flexibility	Dynamic	Dynamic	18	41.7	8.9	67.6	26.9	4.5	Unsupervised	Home	Low risk	Unclear	High risk	High risk	Low risk	Unclear	Low risk	4	Short	1217	390	0.746268657	0.231232675
2	2. Akkaya et al 2016	RCT	Rotator cuff - subacromial impingement	Pain	VAS- activity	Exercise only	Flexibility	Flexibility	Dynamic	Dynamic	18	41.7	8.9	67.6	26.9	4.5	Unsupervised	Home	Low risk	Unclear	High risk	High risk	Low risk	Unclear	Low risk	4	Short	1218	391	2.467661692	0.492134817
2	2. Akkaya et al 2016	RCT	Rotator cuff - subacromial impingement	Pain	VAS- rest	Exercise only	Flexibility	Flexibility	Dynamic	Dynamic	18	41.7	8.9	67.6	26.9	4.5	Unsupervised	Home	Low risk	Unclear	High risk	High risk	Low risk	Unclear	Low risk	4	Short	1219	392	0.682302772	0.224390971
2	2. Akkaya et al 2016	RCT	Rotator cuff - subacromial impingement	Disability	SPADI	Exercise only	Flexibility	Flexibility	Dynamic	Dynamic	18	41.7	8.9	67.6	26.9	4.5	Unsupervised	Home	Low risk	Unclear	High risk	High risk	Low risk	Unclear	Low risk	4	Short	1221	393	1.315098924	0.305726007
2	38. Johansson et al 2005	RCT	Rotator cuff - subacromial impingement	Disability	Combined score of the CMS, Adolfsson-lysholm shoulder score, and the UCLS score)	Multiple exercise types	Resistance	Flexibility, Resistance	Isometric	Isometric, Concentric and eccentric, Dynamic	44	49	7.5	69.4	NA	NA	Unsupervised	Home	Low risk	Unclear	Unclear	Low risk	Low risk	Unclear	High risk	5	Short	1222	394	0.989285001	0.160766467
2	38. Johansson et al 2005	RCT	Rotator cuff - subacromial impingement	Disability	Combined score of the CMS, Adolfsson-lysholm shoulder score, and the UCLS score)	Multiple exercise types	Resistance	Flexibility, Resistance	Isometric	Isometric, Concentric and eccentric, Dynamic	42	49	7.5	69.4	NA	NA	Unsupervised	Home	Low risk	Unclear	Unclear	Low risk	Low risk	Unclear	High risk	13.03572857	Medium	1222	395	1.250879237	0.186329879
2	38. Johansson et al 2005	RCT	Rotator cuff - subacromial impingement	Disability	Combined score of the CMS, Adolfsson-lysholm shoulder score, and the UCLS score)	Multiple exercise types	Resistance	Flexibility, Resistance	Isometric	Isometric, Concentric and eccentric, Dynamic	37	49	7.5	69.4	NA	NA	Unsupervised	Home	Low risk	Unclear	Unclear	Low risk	Low risk	Unclear	High risk	26.07145714	Medium	1222	396	1.581777251	0.231615408
2	38. Johansson et al 2005	RCT	Rotator cuff - subacromial impingement	Disability	Combined score of the CMS, Adolfsson-lysholm shoulder score, and the UCLS score)	Multiple exercise types	Resistance	Flexibility, Resistance	Isometric	Isometric, Concentric and eccentric, Dynamic	34	49	7.5	69.4	NA	NA	Unsupervised	Home	Low risk	Unclear	Unclear	Low risk	Low risk	Unclear	High risk	52.14291429	Medium	1222	397	1.734316097	0.258876403
2	45. Kim et al 2020	RCT	Rotator cuff - subacromial impingement	Physical function capacity	Dynamometer- ext rotation 60	Multiple exercise types	Proprioception	Prioprioception, Vibration	Movement pattern retraining	Movement pattern retraining, Vibration	20	46.15	4.6	100	NA	NA	Supervised	Clinic	Low risk	Low risk	High risk	High risk	Low risk	Unclear	High risk	4	Short	1223	398	4.622302483	0.819984046
2	45. Kim et al 2020	RCT	Rotator cuff - subacromial impingement	Physical function capacity	Dynamometer- ext rotation 180	Multiple exercise types	Proprioception	Prioprioception, Vibration	Movement pattern retraining	Movement pattern retraining, Vibration	20	46.15	4.6	100	NA	NA	Supervised	Clinic	Low risk	Low risk	High risk	High risk	Low risk	Unclear	High risk	4	Short	1224	399	1.401263158	0.299755
2	45. Kim et al 2020	RCT	Rotator cuff - subacromial impingement	Physical function capacity	Dynamometer- int rotation 60	Multiple exercise types	Proprioception	Prioprioception, Vibration	Movement pattern retraining	Movement pattern retraining, Vibration	20	46.15	4.6	100	NA	NA	Supervised	Clinic	Low risk	Low risk	High risk	High risk	Low risk	Unclear	High risk	4	Short	1225	400	1.484008529	0.311481883
2	45. Kim et al 2020	RCT	Rotator cuff - subacromial impingement	Physical function capacity	Dynamometer- int rotation 180	Multiple exercise types	Proprioception	Prioprioception, Vibration	Movement pattern retraining	Movement pattern retraining, Vibration	20	46.15	4.6	100	NA	NA	Supervised	Clinic	Low risk	Low risk	High risk	High risk	Low risk	Unclear	High risk	4	Short	1226	401	1.177560976	0.269319194
2	45. Kim et al 2020	RCT	Rotator cuff - subacromial impingement	Pain	VAS- pain	Multiple exercise types	Proprioception	Prioprioception, Vibration	Movement pattern retraining	Movement pattern retraining, Vibration	20	46.15	4.6	100	NA	NA	Supervised	Clinic	Low risk	Low risk	High risk	High risk	Low risk	Unclear	High risk	4	Short	1227	402	3.692	0.66343602
2	45. Kim et al 2020	RCT	Rotator cuff - subacromial impingement	Disability	SPADI	Multiple exercise types	Proprioception	Prioprioception, Vibration	Movement pattern retraining	Movement pattern retraining, Vibration	20	46.15	4.6	100	NA	NA	Supervised	Clinic	Low risk	Low risk	High risk	High risk	Low risk	Unclear	High risk	4	Short	1228	403	1.41515655	0.301708252
2	45. Kim et al 2020	RCT	Rotator cuff - subacromial impingement	ROM - Shoulder	ROM- ext rotation	Multiple exercise types	Proprioception	Prioprioception, Vibration	Movement pattern retraining	Movement pattern retraining, Vibration	20	46.15	4.6	100	NA	NA	Supervised	Clinic	Low risk	Low risk	High risk	High risk	Low risk	Unclear	High risk	4	Short	1229	404	0.515799087	0.197201488
2	45. Kim et al 2020	RCT	Rotator cuff - subacromial impingement	ROM - Shoulder	ROM- int rotation	Multiple exercise types	Proprioception	Prioprioception, Vibration	Movement pattern retraining	Movement pattern retraining, Vibration	20	46.15	4.6	100	NA	NA	Supervised	Clinic	Low risk	Low risk	High risk	High risk	Low risk	Unclear	High risk	4	Short	1230	405	1.085665236	0.25746555
2	24. Dejaco et al 2017	RCT	Rotator cuff - subacromial impingement	Disability	Constant-murley score	Multiple exercise types	Resistance	Flexibility, Resistance	Eccentric only	Eccentric only, Static	20	49.5	11.3	47.3	NA	NA	Unsupervised	Home	Low risk	Low risk	Low risk	Low risk	Low risk	High risk	Low risk	6	Short	1231	406	0.32	0.184323399
2	24. Dejaco et al 2017	RCT	Rotator cuff - subacromial impingement	Disability	Constant-murley score	Multiple exercise types	Resistance	Flexibility, Resistance	Eccentric only	Eccentric only, Static	20	49.5	11.3	47.3	NA	NA	Unsupervised	Home	Low risk	Low risk	Low risk	Low risk	Low risk	High risk	Low risk	12	Short	1231	407	0.802711864	0.224156769
2	24. Dejaco et al 2017	RCT	Rotator cuff - subacromial impingement	Disability	Constant-murley score	Multiple exercise types	Resistance	Flexibility, Resistance	Eccentric only	Eccentric only, Static	20	49.5	11.3	47.3	NA	NA	Unsupervised	Home	Low risk	Low risk	Low risk	Low risk	Low risk	High risk	Low risk	26	Medium	1231	408	0.781016949	0.221843825
2	24. Dejaco et al 2017	RCT	Rotator cuff - subacromial impingement	Pain	VAS- activity	Multiple exercise types	Resistance	Flexibility, Resistance	Eccentric only	Eccentric only, Static	20	49.5	11.3	47.3	NA	NA	Unsupervised	Home	Low risk	Low risk	Low risk	Low risk	Low risk	High risk	Low risk	6	Short	1232	409	0.804324324	0.22433024
2	24. Dejaco et al 2017	RCT	Rotator cuff - subacromial impingement	Pain	VAS- activity	Multiple exercise types	Resistance	Flexibility, Resistance	Eccentric only	Eccentric only, Static	20	49.5	11.3	47.3	NA	NA	Unsupervised	Home	Low risk	Low risk	Low risk	Low risk	Low risk	High risk	Low risk	12	Short	1232	410	1.536	0.3189594
2	24. Dejaco et al 2017	RCT	Rotator cuff - subacromial impingement	Pain	VAS- activity	Multiple exercise types	Resistance	Flexibility, Resistance	Eccentric only	Eccentric only, Static	20	49.5	11.3	47.3	NA	NA	Unsupervised	Home	Low risk	Low risk	Low risk	Low risk	Low risk	High risk	Low risk	26	Medium	1232	411	1.032648649	0.250832003
2	24. Dejaco et al 2017	RCT	Rotator cuff - subacromial impingement	Disability	Constant murley score	Multiple exercise types	Resistance	Flexibility, Resistance	Eccentric only	Eccentric only, Static	20	49.5	11.3	47.3	NA	NA	Unsupervised	Home	Low risk	Low risk	Low risk	Low risk	Low risk	High risk	Low risk	6	Short	1233	412	0.269508726	0.181883104
2	24. Dejaco et al 2017	RCT	Rotator cuff - subacromial impingement	Disability	Constant murley score	Multiple exercise types	Resistance	Flexibility, Resistance	Eccentric only	Eccentric only, Static	20	49.5	11.3	47.3	NA	NA	Unsupervised	Home	Low risk	Low risk	Low risk	Low risk	Low risk	High risk	Low risk	12	Short	1233	413	0.701372105	0.213705324
2	24. Dejaco et al 2017	RCT	Rotator cuff - subacromial impingement	Disability	Constant murley score	Multiple exercise types	Resistance	Flexibility, Resistance	Eccentric only	Eccentric only, Static	20	49.5	11.3	47.3	NA	NA	Unsupervised	Home	Low risk	Low risk	Low risk	Low risk	Low risk	High risk	Low risk	26	Medium	1233	414	0.68513664	0.212118168
2	24. Dejaco et al 2017	RCT	Rotator cuff - subacromial impingement	Pain	VAS- Average pain during daily activities	Multiple exercise types	Resistance	Flexibility, Resistance	Eccentric only	Eccentric only, Static	20	49.5	11.3	47.3	NA	NA	Unsupervised	Home	Low risk	Low risk	Low risk	Low risk	Low risk	High risk	Low risk	6	Short	1234	415	1.188300449	0.27073173
2	24. Dejaco et al 2017	RCT	Rotator cuff - subacromial impingement	Pain	VAS- Average pain during daily activities	Multiple exercise types	Resistance	Flexibility, Resistance	Eccentric only	Eccentric only, Static	20	49.5	11.3	47.3	NA	NA	Unsupervised	Home	Low risk	Low risk	Low risk	Low risk	Low risk	High risk	Low risk	12	Short	1234	416	2.28887402	0.433811369
2	24. Dejaco et al 2017	RCT	Rotator cuff - subacromial impingement	Pain	VAS- Average pain during daily activities	Multiple exercise types	Resistance	Flexibility, Resistance	Eccentric only	Eccentric only, Static	20	49.5	11.3	47.3	NA	NA	Unsupervised	Home	Low risk	Low risk	Low risk	Low risk	Low risk	High risk	Low risk	26	Medium	1234	417	1.547183136	0.320578071
2	24. Dejaco et al 2017	RCT	Rotator cuff - subacromial impingement	Physical function capacity	Isometric strength	Multiple exercise types	Resistance	Flexibility, Resistance	Eccentric only	Eccentric only, Static	20	49.5	11.3	47.3	NA	NA	Unsupervised	Home	Low risk	Low risk	Low risk	Low risk	Low risk	High risk	Low risk	6	Short	1235	418	0.096459908	0.176578765
2	24. Dejaco et al 2017	RCT	Rotator cuff - subacromial impingement	Physical function capacity	Isometric strength	Multiple exercise types	Resistance	Flexibility, Resistance	Eccentric only	Eccentric only, Static	20	49.5	11.3	47.3	NA	NA	Unsupervised	Home	Low risk	Low risk	Low risk	Low risk	Low risk	High risk	Low risk	12	Short	1235	419	0.329571354	0.184829056
2	24. Dejaco et al 2017	RCT	Rotator cuff - subacromial impingement	Physical function capacity	Isometric strength	Multiple exercise types	Resistance	Flexibility, Resistance	Eccentric only	Eccentric only, Static	20	49.5	11.3	47.3	NA	NA	Unsupervised	Home	Low risk	Low risk	Low risk	Low risk	Low risk	High risk	Low risk	26	Medium	1235	420	0.466222891	0.193459902
2	24. Dejaco et al 2017	RCT	Rotator cuff - subacromial impingement	ROM - Shoulder	Goniometer- forward flexion	Multiple exercise types	Resistance	Flexibility, Resistance	Eccentric only	Eccentric only, Static	20	49.5	11.3	47.3	NA	NA	Unsupervised	Home	Low risk	Low risk	Low risk	Low risk	Low risk	High risk	Low risk	6	Short	1236	421	0.134450069	0.17732297
2	24. Dejaco et al 2017	RCT	Rotator cuff - subacromial impingement	ROM - Shoulder	Goniometer- forward flexion	Multiple exercise types	Resistance	Flexibility, Resistance	Eccentric only	Eccentric only, Static	20	49.5	11.3	47.3	NA	NA	Unsupervised	Home	Low risk	Low risk	Low risk	Low risk	Low risk	High risk	Low risk	12	Short	1236	422	0.19905595	0.179137758
2	24. Dejaco et al 2017	RCT	Rotator cuff - subacromial impingement	ROM - Shoulder	Goniometer- forward flexion	Multiple exercise types	Resistance	Flexibility, Resistance	Eccentric only	Eccentric only, Static	20	49.5	11.3	47.3	NA	NA	Unsupervised	Home	Low risk	Low risk	Low risk	Low risk	Low risk	High risk	Low risk	26	Medium	1236	423	0.09079745	0.176488598
2	92. Stasinopoulos et al 2010	Quasi-experimental	Lateral elbow/tennis elbow	Pain	VAS- 24hr	Multiple exercise types	Resistance	Flexibility, Resistance	Eccentric only	Eccentric Only, Static	35	45.05	5.8	52.8	NA	NA	Unsupervised	Home	Not applicable (quasi)	Not applicable (quasi)	Low risk	Low risk	Low risk	Unclear	High risk	12	Short	1237	424	5.726395067	0.731848352
2	92. Stasinopoulos et al 2010	Quasi-experimental	Lateral elbow/tennis elbow	Pain	VAS- 24hr	Multiple exercise types	Resistance	Flexibility, Resistance	Eccentric only	Eccentric Only, Static	35	45.05	5.8	52.8	NA	NA	Unsupervised	Home	Not applicable (quasi)	Not applicable (quasi)	Low risk	Low risk	Low risk	Unclear	High risk	24	Medium	1237	425	5.809992075	0.742187328
2	92. Stasinopoulos et al 2010	Quasi-experimental	Lateral elbow/tennis elbow	Function	VAS- function over 24hr (0-10 full function)	Multiple exercise types	Resistance	Flexibility, Resistance	Eccentric only	Eccentric Only, Static	35	45.05	5.8	52.8	NA	NA	Unsupervised	Home	Not applicable (quasi)	Not applicable (quasi)	Low risk	Low risk	Low risk	Unclear	High risk	12	Short	1238	426	1.708038115	0.252023389
2	92. Stasinopoulos et al 2010	Quasi-experimental	Lateral elbow/tennis elbow	Function	VAS- function over 24hr (0-10 full function)	Multiple exercise types	Resistance	Flexibility, Resistance	Eccentric only	Eccentric Only, Static	35	45.05	5.8	52.8	NA	NA	Unsupervised	Home	Not applicable (quasi)	Not applicable (quasi)	Low risk	Low risk	Low risk	Unclear	High risk	24	Medium	1238	427	1.783763943	0.260181227
2	83. Rompe et al 2009	RCT	Achilles	Disability	VISA-A	Exercise only	Resistance	Resistance	Eccentric only	Eccentric Only	34	49.68	9.9	55.88	NA	NA	Unsupervised	Home	Low risk	Low risk	High risk	Low risk	Low risk	Unclear	Low risk	17.38097143	Medium	1240	428	2.12495368	0.302683881
2	83. Rompe et al 2009	RCT	Achilles	Pain	NRS- load induced pain	Exercise only	Resistance	Resistance	Eccentric only	Eccentric Only	34	49.68	9.9	55.88	NA	NA	Unsupervised	Home	Low risk	Low risk	High risk	Low risk	Low risk	Unclear	Low risk	17.38097143	Medium	1242	429	3.786259542	0.501861725
2	89. Silbernagel et al 2001	RCT	Achilles	Physical function capacity	Jumping test- plantarflexion	Multiple exercise types	Resistance	Flexibility, Proprioception, Resistance	Concentric and eccentric	Concentric and eccentric, Eccentric only, Static, Dynamic, Balance	22	44	12.45	22.5	NA	NA	Unsupervised	Home	Unclear	Unclear	Unclear	Unclear	Unclear	Unclear	High risk	6	Short	1243	430	0	0.167343569
2	89. Silbernagel et al 2001	RCT	Achilles	Physical function capacity	Jumping test- plantarflexion	Multiple exercise types	Resistance	Flexibility, Proprioception, Resistance	Concentric and eccentric	Concentric and eccentric, Eccentric only, Static, Dynamic, Balance	23	44	12.45	22.5	NA	NA	Unsupervised	Home	Unclear	Unclear	Unclear	Unclear	Unclear	Unclear	High risk	13.03572857	Medium	1243	431	0.139930035	0.165072723
2	89. Silbernagel et al 2001	RCT	Achilles	Physical function capacity	Jumping test- plantarflexion	Multiple exercise types	Resistance	Flexibility, Proprioception, Resistance	Concentric and eccentric	Concentric and eccentric, Eccentric only, Static, Dynamic, Balance	27	44	12.45	22.5	NA	NA	Unsupervised	Home	Unclear	Unclear	Unclear	Unclear	Unclear	Unclear	High risk	26.07145714	Medium	1243	432	0.422119038	0.162665103
2	89. Silbernagel et al 2001	RCT	Achilles	Physical function capacity	Jumping test- SL counter movement jump	Multiple exercise types	Resistance	Flexibility, Proprioception, Resistance	Concentric and eccentric	Concentric and eccentric, Eccentric only, Static, Dynamic, Balance	27	44	12.45	22.5	NA	NA	Unsupervised	Home	Unclear	Unclear	Unclear	Unclear	Unclear	Unclear	High risk	6	Short	1244	433	0	0.150639051
2	89. Silbernagel et al 2001	RCT	Achilles	Physical function capacity	Jumping test- SL counter movement jump	Multiple exercise types	Resistance	Flexibility, Proprioception, Resistance	Concentric and eccentric	Concentric and eccentric, Eccentric only, Static, Dynamic, Balance	27	44	12.45	22.5	NA	NA	Unsupervised	Home	Unclear	Unclear	Unclear	Unclear	Unclear	Unclear	High risk	13.03572857	Medium	1244	434	0.138696255	0.151983202
2	89. Silbernagel et al 2001	RCT	Achilles	Physical function capacity	Jumping test- SL counter movement jump	Multiple exercise types	Resistance	Flexibility, Proprioception, Resistance	Concentric and eccentric	Concentric and eccentric, Eccentric only, Static, Dynamic, Balance	13	44	12.45	22.5	NA	NA	Unsupervised	Home	Unclear	Unclear	Unclear	Unclear	Unclear	Unclear	High risk	26.07145714	Medium	1244	435	0.534954407	0.251663492
2	89. Silbernagel et al 2001	RCT	Achilles	Physical function capacity	Toe raise test- no.	Multiple exercise types	Resistance	Flexibility, Proprioception, Resistance	Concentric and eccentric	Concentric and eccentric, Eccentric only, Static, Dynamic, Balance	27	44	12.45	22.5	NA	NA	Unsupervised	Home	Unclear	Unclear	Unclear	Unclear	Unclear	Unclear	High risk	6	Short	1245	436	0.52956752	0.169181039
2	89. Silbernagel et al 2001	RCT	Achilles	Physical function capacity	Toe raise test- no.	Multiple exercise types	Resistance	Flexibility, Proprioception, Resistance	Concentric and eccentric	Concentric and eccentric, Eccentric only, Static, Dynamic, Balance	29	44	12.45	22.5	NA	NA	Unsupervised	Home	Unclear	Unclear	Unclear	Unclear	Unclear	Unclear	High risk	13.03572857	Medium	1245	437	0.353808354	0.153407236
2	89. Silbernagel et al 2001	RCT	Achilles	Physical function capacity	Toe raise test- no.	Multiple exercise types	Resistance	Flexibility, Proprioception, Resistance	Concentric and eccentric	Concentric and eccentric, Eccentric only, Static, Dynamic, Balance	26	44	12.45	22.5	NA	NA	Unsupervised	Home	Unclear	Unclear	Unclear	Unclear	Unclear	Unclear	High risk	26.07145714	Medium	1245	438	0.35261708	0.162270269
2	7. Bae et al 2011	Quasi-experimental	Rotator cuff - subacromial impingement	Disability	SPADI	Multiple exercise types	Proprioception	Prioprioception, Resistance	Movement pattern retraining	Movement pattern retraining, Concentric and eccentric	17	49.1	4.9	65.68627451	23.2	NA	Supervised	NA	Not applicable (quasi)	Not applicable (quasi)	Unclear	Unclear	Unclear	Unclear	High risk	4	Short	1246	439	2.736077482	0.557329678
2	7. Bae et al 2011	Quasi-experimental	Rotator cuff - subacromial impingement	Physical function capacity	Dynamometer- peak torque ext rotation 60	Multiple exercise types	Proprioception	Prioprioception, Resistance	Movement pattern retraining	Movement pattern retraining, Concentric and eccentric	17	49.1	4.9	65.68627451	23.2	NA	Supervised	NA	Not applicable (quasi)	Not applicable (quasi)	Unclear	Unclear	Unclear	Unclear	High risk	4	Short	1247	440	1.150044924	0.29154779
2	7. Bae et al 2011	Quasi-experimental	Rotator cuff - subacromial impingement	Physical function capacity	Dynamometer- peak torque int rotation 60	Multiple exercise types	Proprioception	Prioprioception, Resistance	Movement pattern retraining	Movement pattern retraining, Concentric and eccentric	17	49.1	4.9	65.68627451	23.2	NA	Supervised	NA	Not applicable (quasi)	Not applicable (quasi)	Unclear	Unclear	Unclear	Unclear	High risk	4	Short	1249	441	0.158730159	0.193670696
2	7. Bae et al 2011	Quasi-experimental	Rotator cuff - subacromial impingement	Physical function capacity	Dynamometer- peak torque int rotation 180	Multiple exercise types	Proprioception	Prioprioception, Resistance	Movement pattern retraining	Movement pattern retraining, Concentric and eccentric	17	49.1	4.9	65.68627451	23.2	NA	Supervised	NA	Not applicable (quasi)	Not applicable (quasi)	Unclear	Unclear	Unclear	Unclear	High risk	4	Short	1250	442	0.266106443	0.197934757
2	7. Bae et al 2011	Quasi-experimental	Rotator cuff - subacromial impingement	ROM - Shoulder	ROM- flexion	Multiple exercise types	Proprioception	Prioprioception, Resistance	Movement pattern retraining	Movement pattern retraining, Concentric and eccentric	17	49.1	4.9	65.68627451	23.2	NA	Supervised	NA	Not applicable (quasi)	Not applicable (quasi)	Unclear	Unclear	Unclear	Unclear	High risk	4	Short	1251	443	1.302445302	0.31413637
2	7. Bae et al 2011	Quasi-experimental	Rotator cuff - subacromial impingement	ROM - Shoulder	ROM- extension	Multiple exercise types	Proprioception	Prioprioception, Resistance	Movement pattern retraining	Movement pattern retraining, Concentric and eccentric	17	49.1	4.9	65.68627451	23.2	NA	Supervised	NA	Not applicable (quasi)	Not applicable (quasi)	Unclear	Unclear	Unclear	Unclear	High risk	4	Short	1252	444	0.91954023	0.259880118
2	7. Bae et al 2011	Quasi-experimental	Rotator cuff - subacromial impingement	ROM - Shoulder	ROM- abduction	Multiple exercise types	Proprioception	Prioprioception, Resistance	Movement pattern retraining	Movement pattern retraining, Concentric and eccentric	17	49.1	4.9	65.68627451	23.2	NA	Supervised	NA	Not applicable (quasi)	Not applicable (quasi)	Unclear	Unclear	Unclear	Unclear	High risk	4	Short	1253	445	2.911564626	0.58897817
2	7. Bae et al 2011	Quasi-experimental	Rotator cuff - subacromial impingement	ROM - Shoulder	ROM- ext rotation	Multiple exercise types	Proprioception	Prioprioception, Resistance	Movement pattern retraining	Movement pattern retraining, Concentric and eccentric	17	49.1	4.9	65.68627451	23.2	NA	Supervised	NA	Not applicable (quasi)	Not applicable (quasi)	Unclear	Unclear	Unclear	Unclear	High risk	4	Short	1254	446	1.630591631	0.365941
2	7. Bae et al 2011	Quasi-experimental	Rotator cuff - subacromial impingement	ROM - Shoulder	ROM- int rotation	Multiple exercise types	Proprioception	Prioprioception, Resistance	Movement pattern retraining	Movement pattern retraining, Concentric and eccentric	17	49.1	4.9	65.68627451	23.2	NA	Supervised	NA	Not applicable (quasi)	Not applicable (quasi)	Unclear	Unclear	Unclear	Unclear	High risk	4	Short	1255	447	0.822510823	0.247689939
2	108. Wen et al 2011	RCT	Lateral elbow/tennis elbow	Pain	VAS- decreas in pain	Exercise only	Resistance	Resistance	Eccentric only	Eccentric only	14	46	7.3	46.4	NA	NA	Unsupervised	Home	Unclear	Unclear	Low risk	Unclear	High risk	Unclear	High risk	4	Short	1256	448	1.684210526	0.421682236
2	110. Wiedmann et al 2017	RCT	Achilles	Disability	VISA-A	Exercise only	Resistance	Resistance	Eccentric only	Eccentric only	10	43	6	65	NA	NA	Unsupervised	Home	Low risk	Low risk	Unclear	Unclear	Unclear	Unclear	High risk	6	Short	1257	449	0.591596639	0.301077056
2	110. Wiedmann et al 2017	RCT	Achilles	Disability	VISA-A	Exercise only	Resistance	Resistance	Eccentric only	Eccentric only	10	43	6	65	NA	NA	Unsupervised	Home	Low risk	Low risk	Unclear	Unclear	Unclear	Unclear	High risk	12	Short	1257	450	0.914285714	0.356331106
2	110. Wiedmann et al 2017	RCT	Achilles	Pain	VAS	Exercise only	Resistance	Resistance	Eccentric only	Eccentric only	10	43	6	65	NA	NA	Unsupervised	Home	Low risk	Low risk	Unclear	Unclear	Unclear	Unclear	High risk	6	Short	1258	451	1.010526316	0.375259018
2	110. Wiedmann et al 2017	RCT	Achilles	Pain	VAS	Exercise only	Resistance	Resistance	Eccentric only	Eccentric only	10	43	6	65	NA	NA	Unsupervised	Home	Low risk	Low risk	Unclear	Unclear	Unclear	Unclear	High risk	12	Short	1258	452	1.587969925	0.502975018
2	114. Yu et al 2013	Quasi-experimental	Achilles	Pain	VAS	Exercise only	Resistance	Resistance	Eccentric only	Eccentric only	16	30.34	1.555	0	21.6	NA	NA	NA	Low risk	Low risk	Low risk	Unclear	Low risk	Unclear	Unclear	8	Short	1258	453	3.796610169	0.779863113
2	114. Yu et al 2013	Quasi-experimental	Achilles	Physical function capacity	Peak torque knee extension	Exercise only	Resistance	Resistance	Eccentric only	Eccentric only	16	30.34	1.555	0	21.6	NA	NA	NA	Low risk	Low risk	Low risk	Unclear	Low risk	Unclear	Unclear	8	Short	1259	454	3.81697825	0.783779442
2	114. Yu et al 2013	Quasi-experimental	Achilles	Physical function capacity	Peak torque knee flexion	Exercise only	Resistance	Resistance	Eccentric only	Eccentric only	16	30.34	1.555	0	21.6	NA	NA	NA	Low risk	Low risk	Low risk	Unclear	Low risk	Unclear	Unclear	8	Short	1260	455	1.007754066	0.281220042
2	114. Yu et al 2013	Quasi-experimental	Achilles	Physical function capacity	Peak torque ankle plantarflexion	Exercise only	Resistance	Resistance	Eccentric only	Eccentric only	16	30.34	1.555	0	21.6	NA	NA	NA	Low risk	Low risk	Low risk	Unclear	Low risk	Unclear	Unclear	8	Short	1261	456	1.238081898	0.31545455
2	114. Yu et al 2013	Quasi-experimental	Achilles	Physical function capacity	Peak torque ankle dorsiflexion	Exercise only	Resistance	Resistance	Eccentric only	Eccentric only	16	30.34	1.555	0	21.6	NA	NA	NA	Low risk	Low risk	Low risk	Unclear	Low risk	Unclear	Unclear	8	Short	1262	457	1.059358933	0.288612432
2	114. Yu et al 2013	Quasi-experimental	Achilles	Physical function capacity	Endurance of knee extension	Exercise only	Resistance	Resistance	Eccentric only	Eccentric only	16	30.34	1.555	0	21.6	NA	NA	NA	Low risk	Low risk	Low risk	Unclear	Low risk	Unclear	Unclear	8	Short	1263	458	0.886681781	0.264626809
2	114. Yu et al 2013	Quasi-experimental	Achilles	Physical function capacity	Endurance of knee flexion	Exercise only	Resistance	Resistance	Eccentric only	Eccentric only	16	30.34	1.555	0	21.6	NA	NA	NA	Low risk	Low risk	Low risk	Unclear	Low risk	Unclear	Unclear	8	Short	1264	459	0.24082975	0.203153065
2	114. Yu et al 2013	Quasi-experimental	Achilles	Physical function capacity	Endurance of ankle plantarflexion	Exercise only	Resistance	Resistance	Eccentric only	Eccentric only	16	30.34	1.555	0	21.6	NA	NA	NA	Low risk	Low risk	Low risk	Unclear	Low risk	Unclear	Unclear	8	Short	1265	460	2.911879745	0.611400522
2	114. Yu et al 2013	Quasi-experimental	Achilles	Physical function capacity	Endurance of ankle dorsiflexion	Exercise only	Resistance	Resistance	Eccentric only	Eccentric only	16	30.34	1.555	0	21.6	NA	NA	NA	Low risk	Low risk	Low risk	Unclear	Low risk	Unclear	Unclear	8	Short	1266	461	3.045418679	0.636573176
2	114. Yu et al 2013	Quasi-experimental	Achilles	Physical function capacity	Total balance index	Exercise only	Resistance	Resistance	Eccentric only	Eccentric only	16	30.34	1.555	0	21.6	NA	NA	NA	Low risk	Low risk	Low risk	Unclear	Low risk	Unclear	Unclear	8	Short	1267	462	3.165328925	0.659267936
2	114. Yu et al 2013	Quasi-experimental	Achilles	Physical function capacity	Anterior posterior balance index	Exercise only	Resistance	Resistance	Eccentric only	Eccentric only	16	30.34	1.555	0	21.6	NA	NA	NA	Low risk	Low risk	Low risk	Unclear	Low risk	Unclear	Unclear	8	Short	1268	463	6.609395558	1.328166699
2	114. Yu et al 2013	Quasi-experimental	Achilles	Physical function capacity	Medial lateral balance index	Exercise only	Resistance	Resistance	Eccentric only	Eccentric only	16	30.34	1.555	0	21.6	NA	NA	NA	Low risk	Low risk	Low risk	Unclear	Low risk	Unclear	Unclear	8	Short	1269	464	4.621104429	0.939284251
2	114. Yu et al 2013	Quasi-experimental	Achilles	Physical function capacity	Dexterity	Exercise only	Resistance	Resistance	Eccentric only	Eccentric only	16	30.34	1.555	0	21.6	NA	NA	NA	Low risk	Low risk	Low risk	Unclear	Low risk	Unclear	Unclear	8	Short	1270	465	4.069257219	0.832391138
2	114. Yu et al 2013	Quasi-experimental	Achilles	Physical function capacity	Agility	Exercise only	Resistance	Resistance	Eccentric only	Eccentric only	16	30.34	1.555	0	21.6	NA	NA	NA	Low risk	Low risk	Low risk	Unclear	Low risk	Unclear	Unclear	8	Short	1271	466	3.267106089	0.678591729
2	4. Alfredson et al 1999	Quasi-experimental	Achilles	Physical function capacity	Dynamometer- Peak torque concentric plantar flexion 90	Exercise only	Resistance	Resistance	Eccentric only	Eccentric only	14	42.55	9	14.28571429	49.6	NA	Unsupervised	NA	Not applicable (quasi)	Not applicable (quasi)	Not applicable (quasi)	Not applicable (quasi)	Low risk	Unclear	High risk	13.03572857	Medium	1272	467	0.181256748	0.215419895
2	4. Alfredson et al 1999	Quasi-experimental	Achilles	Physical function capacity	Dynamometer- Peak torque concentric plantar flexion 90	Exercise only	Resistance	Resistance	Eccentric only	Eccentric only	14	42.55	9	14.28571429	49.6	NA	Unsupervised	NA	Not applicable (quasi)	Not applicable (quasi)	Not applicable (quasi)	Not applicable (quasi)	Low risk	Unclear	High risk	39.10718571	Medium	1272	468	0.137755128	0.213904862
2	4. Alfredson et al 1999	Quasi-experimental	Achilles	Physical function capacity	Dynamometer- Peak torque concentric plantar flexion 225	Exercise only	Resistance	Resistance	Eccentric only	Eccentric only	14	42.55	9	14.28571429	49.6	NA	Unsupervised	NA	Not applicable (quasi)	Not applicable (quasi)	Not applicable (quasi)	Not applicable (quasi)	Low risk	Unclear	High risk	13.03572857	Medium	1273	469	0.213641305	0.216806673
2	4. Alfredson et al 1999	Quasi-experimental	Achilles	Physical function capacity	Dynamometer- Peak torque concentric plantar flexion 225	Exercise only	Resistance	Resistance	Eccentric only	Eccentric only	14	42.55	9	14.28571429	49.6	NA	Unsupervised	NA	Not applicable (quasi)	Not applicable (quasi)	Not applicable (quasi)	Not applicable (quasi)	Low risk	Unclear	High risk	39.10718571	Medium	1273	470	0.065735786	0.212293183
2	4. Alfredson et al 1999	Quasi-experimental	Achilles	Physical function capacity	Dynamometer- eccentric plantarflex torque	Exercise only	Resistance	Resistance	Eccentric only	Eccentric only	14	42.55	9	14.28571429	49.6	NA	Unsupervised	NA	Not applicable (quasi)	Not applicable (quasi)	Not applicable (quasi)	Not applicable (quasi)	Low risk	Unclear	High risk	13.03572857	Medium	1274	471	0.212147272	0.216737901
2	4. Alfredson et al 1999	Quasi-experimental	Achilles	Physical function capacity	Dynamometer- eccentric plantarflex torque	Exercise only	Resistance	Resistance	Eccentric only	Eccentric only	14	42.55	9	14.28571429	49.6	NA	Unsupervised	NA	Not applicable (quasi)	Not applicable (quasi)	Not applicable (quasi)	Not applicable (quasi)	Low risk	Unclear	High risk	39.10718571	Medium	1274	472	0.164339436	0.214782919
2	4. Alfredson et al 1999	Quasi-experimental	Achilles	Pain	VAS- running	Exercise only	Resistance	Resistance	Eccentric only	Eccentric only	14	42.55	9	14.28571429	49.6	NA	Unsupervised	NA	Not applicable (quasi)	Not applicable (quasi)	Not applicable (quasi)	Not applicable (quasi)	Low risk	Unclear	High risk	13.03572857	Medium	1275	473	2.879398335	0.658378825
2	4. Alfredson et al 1999	Quasi-experimental	Achilles	Pain	VAS- running	Exercise only	Resistance	Resistance	Eccentric only	Eccentric only	14	42.55	9	14.28571429	49.6	NA	Unsupervised	NA	Not applicable (quasi)	Not applicable (quasi)	Not applicable (quasi)	Not applicable (quasi)	Low risk	Unclear	High risk	39.10718571	Medium	1275	474	2.711791566	0.624131175
2	73. Peterson et al 2011	RCT	Lateral elbow/tennis elbow	Pain	VAS- pain max voluntary contraction	Exercise only	Resistance	Resistance	Concentric and eccentric	Concentric and eccentric	40	48.25	8.35	41.95	NA	NA	Unsupervised	NA	Low risk	Low risk	Unclear	High risk	Low risk	Low risk	Low risk	4.345242857	Short	1276	475	0.444065733	0.133775104
2	73. Peterson et al 2011	RCT	Lateral elbow/tennis elbow	Pain	VAS- pain max voluntary contraction	Exercise only	Resistance	Resistance	Concentric and eccentric	Concentric and eccentric	40	48.25	8.35	41.95	NA	NA	Unsupervised	NA	Low risk	Low risk	Unclear	High risk	Low risk	Low risk	Low risk	8.690485714	Short	1276	476	0.773414486	0.152865367
2	73. Peterson et al 2011	RCT	Lateral elbow/tennis elbow	Pain	VAS- pain max voluntary contraction	Exercise only	Resistance	Resistance	Concentric and eccentric	Concentric and eccentric	40	48.25	8.35	41.95	NA	NA	Unsupervised	NA	Low risk	Low risk	Unclear	High risk	Low risk	Low risk	Low risk	13.03572857	Medium	1276	477	0.840024346	0.157589521
2	73. Peterson et al 2011	RCT	Lateral elbow/tennis elbow	Pain	VAS- pain max muscle elongation	Exercise only	Resistance	Resistance	Concentric and eccentric	Concentric and eccentric	40	48.25	8.35	41.95	NA	NA	Unsupervised	NA	Low risk	Low risk	Unclear	High risk	Low risk	Low risk	Low risk	4.345242857	Short	1277	478	0.611192798	0.142487062
2	73. Peterson et al 2011	RCT	Lateral elbow/tennis elbow	Pain	VAS- pain max muscle elongation	Exercise only	Resistance	Resistance	Concentric and eccentric	Concentric and eccentric	40	48.25	8.35	41.95	NA	NA	Unsupervised	NA	Low risk	Low risk	Unclear	High risk	Low risk	Low risk	Low risk	8.690485714	Short	1277	479	0.944156039	0.165438497
2	73. Peterson et al 2011	RCT	Lateral elbow/tennis elbow	Pain	VAS- pain max muscle elongation	Exercise only	Resistance	Resistance	Concentric and eccentric	Concentric and eccentric	40	48.25	8.35	41.95	NA	NA	Unsupervised	NA	Low risk	Low risk	Unclear	High risk	Low risk	Low risk	Low risk	13.03572857	Medium	1277	480	1.044501125	0.173473762
2	73. Peterson et al 2011	RCT	Lateral elbow/tennis elbow	Physical function capacity	Dynamometer- muscle strength	Exercise only	Resistance	Resistance	Concentric and eccentric	Concentric and eccentric	40	48.25	8.35	41.95	NA	NA	Unsupervised	NA	Low risk	Low risk	Unclear	High risk	Low risk	Low risk	Low risk	4.345242857	Short	1278	481	-0.024567311	0.123340743
2	73. Peterson et al 2011	RCT	Lateral elbow/tennis elbow	Physical function capacity	Dynamometer- muscle strength	Exercise only	Resistance	Resistance	Concentric and eccentric	Concentric and eccentric	40	48.25	8.35	41.95	NA	NA	Unsupervised	NA	Low risk	Low risk	Unclear	High risk	Low risk	Low risk	Low risk	8.690485714	Short	1278	482	0.223153074	0.126032841
2	73. Peterson et al 2011	RCT	Lateral elbow/tennis elbow	Physical function capacity	Dynamometer- muscle strength	Exercise only	Resistance	Resistance	Concentric and eccentric	Concentric and eccentric	40	48.25	8.35	41.95	NA	NA	Unsupervised	NA	Low risk	Low risk	Unclear	High risk	Low risk	Low risk	Low risk	13.03572857	Medium	1278	483	0.149451141	0.124537195
2	73. Peterson et al 2011	RCT	Lateral elbow/tennis elbow	Disability	DASH	Exercise only	Resistance	Resistance	Concentric and eccentric	Concentric and eccentric	40	48.25	8.35	41.95	NA	NA	Unsupervised	NA	Low risk	Low risk	Unclear	High risk	Low risk	Low risk	Low risk	13.03572857	Medium	1279	484	0.804435484	0.155034784
2	73. Peterson et al 2011	RCT	Lateral elbow/tennis elbow	QoL	Gothenburg quality of life (GQL)- activity	Exercise only	Resistance	Resistance	Concentric and eccentric	Concentric and eccentric	40	48.25	8.35	41.95	NA	NA	Unsupervised	NA	Low risk	Low risk	Unclear	High risk	Low risk	Low risk	Low risk	13.03572857	Medium	1280	485	-0.145771578	0.124477662
2	73. Peterson et al 2011	RCT	Lateral elbow/tennis elbow	QoL	Gothenburg quality of life (GQL)- wellbeing	Exercise only	Resistance	Resistance	Concentric and eccentric	Concentric and eccentric	40	48.25	8.35	41.95	NA	NA	Unsupervised	NA	Low risk	Low risk	Unclear	High risk	Low risk	Low risk	Low risk	13.03572857	Medium	1281	486	0.075434243	0.123621831
2	73. Peterson et al 2011	RCT	Lateral elbow/tennis elbow	QoL	Gothenburg quality of life (GQL)- complaint score	Exercise only	Resistance	Resistance	Concentric and eccentric	Concentric and eccentric	40	48.25	8.35	41.95	NA	NA	Unsupervised	NA	Low risk	Low risk	Unclear	High risk	Low risk	Low risk	Low risk	13.03572857	Medium	1282	487	-0.023918175	0.123339002
2	42. Ketola et al 2009	RCT	Rotator cuff - subacromial impingement	Pain	VAS- pain	Multiple exercise types	Resistance	Resistance, Proprioception	Concentric and eccentric	Movement pattern retraining, Concentric and eccentric	66	47.1	range: 26.8-59.2; 23.3-60	62.85714286	27.2	range: 19.5-46.3; 15.2-41.2	Unsupervised	NA	Low risk	Low risk	Unclear	Low risk	Low risk	Unclear	High risk	13.03572857	Medium	1283	488	0.690399019	0.113879706
2	42. Ketola et al 2009	RCT	Rotator cuff - subacromial impingement	Pain	VAS- pain	Multiple exercise types	Resistance	Resistance, Proprioception	Concentric and eccentric	Movement pattern retraining, Concentric and eccentric	66	47.1	range: 26.8-59.2; 23.3-60	62.85714286	27.2	range: 19.5-46.3; 15.2-41.2	Unsupervised	NA	Low risk	Low risk	Unclear	Low risk	Low risk	Unclear	High risk	26.07145714	Medium	1283	489	0.920532025	0.126206632
2	42. Ketola et al 2009	RCT	Rotator cuff - subacromial impingement	Pain	VAS- pain	Multiple exercise types	Resistance	Resistance, Proprioception	Concentric and eccentric	Movement pattern retraining, Concentric and eccentric	66	47.1	range: 26.8-59.2; 23.3-60	62.85714286	27.2	range: 19.5-46.3; 15.2-41.2	Unsupervised	NA	Low risk	Low risk	Unclear	Low risk	Low risk	Unclear	High risk	52.14291429	Medium	1283	490	0.920532025	0.126206632
2	42. Ketola et al 2009	RCT	Rotator cuff - subacromial impingement	Pain	VAS- pain	Multiple exercise types	Resistance	Resistance, Proprioception	Concentric and eccentric	Movement pattern retraining, Concentric and eccentric	66	47.1	range: 26.8-59.2; 23.3-60	62.85714286	27.2	range: 19.5-46.3; 15.2-41.2	Unsupervised	NA	Low risk	Low risk	Unclear	Low risk	Low risk	Unclear	High risk	104.2858286	Long	1283	491	1.183541176	0.14263882
2	42. Ketola et al 2009	RCT	Rotator cuff - subacromial impingement	Disability	VAS- disability	Multiple exercise types	Resistance	Resistance, Proprioception	Concentric and eccentric	Movement pattern retraining, Concentric and eccentric	66	47.1	range: 26.8-59.2; 23.3-60	62.85714286	27.2	range: 19.5-46.3; 15.2-41.2	Unsupervised	NA	Low risk	Low risk	Unclear	Low risk	Low risk	Unclear	High risk	13.03572857	Medium	1284	492	0.732193028	0.115944916
2	42. Ketola et al 2009	RCT	Rotator cuff - subacromial impingement	Disability	VAS- diability	Multiple exercise types	Resistance	Resistance, Proprioception	Concentric and eccentric	Movement pattern retraining, Concentric and eccentric	66	47.1	range: 26.8-59.2; 23.3-60	62.85714286	27.2	range: 19.5-46.3; 15.2-41.2	Unsupervised	NA	Low risk	Low risk	Unclear	Low risk	Low risk	Unclear	High risk	26.07145714	Medium	1285	493	1.131571043	0.139231262
2	42. Ketola et al 2009	RCT	Rotator cuff - subacromial impingement	Disability	VAS- disability	Multiple exercise types	Resistance	Resistance, Proprioception	Concentric and eccentric	Movement pattern retraining, Concentric and eccentric	66	47.1	range: 26.8-59.2; 23.3-60	62.85714286	27.2	range: 19.5-46.3; 15.2-41.2	Unsupervised	NA	Low risk	Low risk	Unclear	Low risk	Low risk	Unclear	High risk	52.14291429	Medium	1286	494	1.06500804	0.134974598
2	42. Ketola et al 2009	RCT	Rotator cuff - subacromial impingement	Disability	VAS- disability	Multiple exercise types	Resistance	Resistance, Proprioception	Concentric and eccentric	Movement pattern retraining, Concentric and eccentric	66	47.1	range: 26.8-59.2; 23.3-60	62.85714286	27.2	range: 19.5-46.3; 15.2-41.2	Unsupervised	NA	Low risk	Low risk	Unclear	Low risk	Low risk	Unclear	High risk	104.2858286	Long	1286	495	1.264697048	0.148094455
2	42. Ketola et al 2009	RCT	Rotator cuff - subacromial impingement	Pain	VAS- pain at night	Multiple exercise types	Resistance	Resistance, Proprioception	Concentric and eccentric	Movement pattern retraining, Concentric and eccentric	66	47.1	range: 26.8-59.2; 23.3-60	62.85714286	27.2	range: 19.5-46.3; 15.2-41.2	Unsupervised	NA	Low risk	Low risk	Unclear	Low risk	Low risk	Unclear	High risk	13.03572857	Medium	1288	496	0.887655882	0.124312326
2	42. Ketola et al 2009	RCT	Rotator cuff - subacromial impingement	Pain	VAS- pain at night	Multiple exercise types	Resistance	Resistance, Proprioception	Concentric and eccentric	Movement pattern retraining, Concentric and eccentric	66	47.1	range: 26.8-59.2; 23.3-60	62.85714286	27.2	range: 19.5-46.3; 15.2-41.2	Unsupervised	NA	Low risk	Low risk	Unclear	Low risk	Low risk	Unclear	High risk	26.07145714	Medium	1288	497	1.084912744	0.136234221
2	42. Ketola et al 2009	RCT	Rotator cuff - subacromial impingement	Pain	VAS- pain at night	Multiple exercise types	Resistance	Resistance, Proprioception	Concentric and eccentric	Movement pattern retraining, Concentric and eccentric	66	47.1	range: 26.8-59.2; 23.3-60	62.85714286	27.2	range: 19.5-46.3; 15.2-41.2	Unsupervised	NA	Low risk	Low risk	Unclear	Low risk	Low risk	Unclear	High risk	52.14291429	Medium	1288	498	1.084912744	0.136234221
2	42. Ketola et al 2009	RCT	Rotator cuff - subacromial impingement	Pain	VAS- pain at night	Multiple exercise types	Resistance	Resistance, Proprioception	Concentric and eccentric	Movement pattern retraining, Concentric and eccentric	66	47.1	range: 26.8-59.2; 23.3-60	62.85714286	27.2	range: 19.5-46.3; 15.2-41.2	Unsupervised	NA	Low risk	Low risk	Unclear	Low risk	Low risk	Unclear	High risk	104.2858286	Long	1288	499	1.282169607	0.149289027
2	42. Ketola et al 2009	RCT	Rotator cuff - subacromial impingement	Disability	SDQ	Multiple exercise types	Resistance	Resistance, Proprioception	Concentric and eccentric	Movement pattern retraining, Concentric and eccentric	66	47.1	range: 26.8-59.2; 23.3-60	62.85714286	27.2	range: 19.5-46.3; 15.2-41.2	Unsupervised	NA	Low risk	Low risk	Unclear	Low risk	Low risk	Unclear	High risk	13.03572857	Medium	1289	500	1.190118756	0.143075054
2	42. Ketola et al 2009	RCT	Rotator cuff - subacromial impingement	Disability	SDQ	Multiple exercise types	Resistance	Resistance, Proprioception	Concentric and eccentric	Movement pattern retraining, Concentric and eccentric	66	47.1	range: 26.8-59.2; 23.3-60	62.85714286	27.2	range: 19.5-46.3; 15.2-41.2	Unsupervised	NA	Low risk	Low risk	Unclear	Low risk	Low risk	Unclear	High risk	26.07145714	Medium	1289	501	1.714652578	0.180648229
2	42. Ketola et al 2009	RCT	Rotator cuff - subacromial impingement	Disability	SDQ	Multiple exercise types	Resistance	Resistance, Proprioception	Concentric and eccentric	Movement pattern retraining, Concentric and eccentric	66	47.1	range: 26.8-59.2; 23.3-60	62.85714286	27.2	range: 19.5-46.3; 15.2-41.2	Unsupervised	NA	Low risk	Low risk	Unclear	Low risk	Low risk	Unclear	High risk	52.14291429	Medium	1289	502	1.802809523	0.187374551
2	42. Ketola et al 2009	RCT	Rotator cuff - subacromial impingement	Disability	SDQ	Multiple exercise types	Resistance	Resistance, Proprioception	Concentric and eccentric	Movement pattern retraining, Concentric and eccentric	66	47.1	range: 26.8-59.2; 23.3-60	62.85714286	27.2	range: 19.5-46.3; 15.2-41.2	Unsupervised	NA	Low risk	Low risk	Unclear	Low risk	Low risk	Unclear	High risk	104.2858286	Long	1289	503	2.19070008	0.217888167
2	42. Ketola et al 2009	RCT	Rotator cuff - subacromial impingement	Pain	Reported painful days	Multiple exercise types	Resistance	Resistance, Proprioception	Concentric and eccentric	Movement pattern retraining, Concentric and eccentric	66	47.1	range: 26.8-59.2; 23.3-60	62.85714286	27.2	range: 19.5-46.3; 15.2-41.2	Unsupervised	NA	Low risk	Low risk	Unclear	Low risk	Low risk	Unclear	High risk	13.03572857	Medium	1290	504	1.161542177	0.141187797
2	42. Ketola et al 2009	RCT	Rotator cuff - subacromial impingement	Pain	Reported painful days	Multiple exercise types	Resistance	Resistance, Proprioception	Concentric and eccentric	Movement pattern retraining, Concentric and eccentric	66	47.1	range: 26.8-59.2; 23.3-60	62.85714286	27.2	range: 19.5-46.3; 15.2-41.2	Unsupervised	NA	Low risk	Low risk	Unclear	Low risk	Low risk	Unclear	High risk	26.07145714	Medium	1290	505	2.036343816	0.205588367
2	42. Ketola et al 2009	RCT	Rotator cuff - subacromial impingement	Pain	Reported painful days	Multiple exercise types	Resistance	Resistance, Proprioception	Concentric and eccentric	Movement pattern retraining, Concentric and eccentric	66	47.1	range: 26.8-59.2; 23.3-60	62.85714286	27.2	range: 19.5-46.3; 15.2-41.2	Unsupervised	NA	Low risk	Low risk	Unclear	Low risk	Low risk	Unclear	High risk	52.14291429	Medium	1290	506	2.313364336	0.227784471
2	42. Ketola et al 2009	RCT	Rotator cuff - subacromial impingement	Pain	Reported painful days	Multiple exercise types	Resistance	Resistance, Proprioception	Concentric and eccentric	Movement pattern retraining, Concentric and eccentric	66	47.1	range: 26.8-59.2; 23.3-60	62.85714286	27.2	range: 19.5-46.3; 15.2-41.2	Unsupervised	NA	Low risk	Low risk	Unclear	Low risk	Low risk	Unclear	High risk	104.2858286	Long	1290	507	2.590384855	0.250459959
2	79. Rio et al 2017	RCT	Patellar	Pain	Change in pain during SLDS (NRS)	Exercise only	Resistance	Resistance	Concentric and eccentric	Concentric and eccentric	10	22.5	4.7	10	NA	NA	Unsupervised	NA	Low risk	Low risk	Low risk	Low risk	Low risk	Low risk	High risk	1	Short	1291	508	0.35217143	0.271581019
2	79. Rio et al 2017	RCT	Patellar	Pain	Change in pain during SLDS (NRS)	Exercise only	Resistance	Resistance	Concentric and eccentric	Concentric and eccentric	10	22.5	4.7	10	NA	NA	Unsupervised	NA	Low risk	Low risk	Low risk	Low risk	Low risk	Low risk	High risk	2	Short	1291	509	0.398944221	0.276373709
2	79. Rio et al 2017	RCT	Patellar	Pain	Change in pain during SLDS (NRS)	Exercise only	Resistance	Resistance	Concentric and eccentric	Concentric and eccentric	10	22.5	4.7	10	NA	NA	Unsupervised	NA	Low risk	Low risk	Low risk	Low risk	Low risk	Low risk	High risk	3	Short	1291	510	0.335663628	0.270013824
2	79. Rio et al 2017	RCT	Patellar	Pain	Change in pain during SLDS (NRS)	Exercise only	Resistance	Resistance	Concentric and eccentric	Concentric and eccentric	10	22.5	4.7	10	NA	NA	Unsupervised	NA	Low risk	Low risk	Low risk	Low risk	Low risk	Low risk	High risk	4	Short	1291	511	0.132064286	0.256493435
2	79. Rio et al 2017	RCT	Patellar	Disability	VISA-P	Exercise only	Resistance	Resistance	Concentric and eccentric	Concentric and eccentric	10	22.5	4.7	10	NA	NA	Unsupervised	NA	Low risk	Low risk	Low risk	Low risk	Low risk	Low risk	High risk	4	Short	1292	512	0.490720024	0.287203616
2	39. Jonsson et al 2005	RCT	Patellar	Pain	VAS- activity	Exercise only	Resistance	Resistance	Eccentric only	Eccentric only	8	24.9	8.15	13.33333333	24.2	NA	NA	NA	Unclear	Unclear	Low risk	Unclear	High risk	Unclear	High risk	12	Short	1293	513	2.754458162	0.942603054
2	39. Jonsson et al 2005	RCT	Patellar	Disability	VISA	Exercise only	Resistance	Resistance	Eccentric only	Eccentric only	8	24.9	8.15	13.33333333	24.2	NA	NA	NA	Unclear	Unclear	Low risk	Unclear	High risk	Unclear	High risk	12	Short	1294	514	2.0955928	0.74109511
2	60. McCormack et al 2016	RCT	Achilles	Disability	VISA-A	Exercise only	Resistance	Resistance	Eccentric only	Eccentric Only	8	53.6	range: 42-69; 38-69	68.75	36.95	NA	Unsupervised	NA	Low risk	Low risk	Unclear	Unclear	Low risk	Low risk	Low risk	4	Short	1295	515	0.114068274	0.29042114
2	60. McCormack et al 2016	RCT	Achilles	Disability	VISA-A	Exercise only	Resistance	Resistance	Eccentric only	Eccentric Only	8	53.6	range: 42-69; 38-69	68.75	36.95	NA	Unsupervised	NA	Low risk	Low risk	Unclear	Unclear	Low risk	Low risk	Low risk	8	Short	1295	516	0.538402254	0.337253652
2	60. McCormack et al 2016	RCT	Achilles	Disability	VISA-A	Exercise only	Resistance	Resistance	Eccentric only	Eccentric Only	8	53.6	range: 42-69; 38-69	68.75	36.95	NA	Unsupervised	NA	Low risk	Low risk	Unclear	Unclear	Low risk	Low risk	Low risk	12	Short	1295	517	0.42433398	0.319500192
2	60. McCormack et al 2016	RCT	Achilles	Disability	VISA-A	Exercise only	Resistance	Resistance	Eccentric only	Eccentric Only	8	53.6	range: 42-69; 38-69	68.75	36.95	NA	Unsupervised	NA	Low risk	Low risk	Unclear	Unclear	Low risk	Low risk	Low risk	26	Medium	1295	518	0.552090447	0.339595133
2	60. McCormack et al 2016	RCT	Achilles	Disability	VISA-A	Exercise only	Resistance	Resistance	Eccentric only	Eccentric Only	8	53.6	range: 42-69; 38-69	68.75	36.95	NA	Unsupervised	NA	Low risk	Low risk	Unclear	Unclear	Low risk	Low risk	Low risk	52	Medium	1295	519	1.04030266	0.444821712
2	60. McCormack et al 2016	RCT	Achilles	Pain	NPRS- average of current pain, and worst and least pain in the last 24 hrs	Exercise only	Resistance	Resistance	Eccentric only	Eccentric Only	8	53.6	range: 42-69; 38-69	68.75	36.95	NA	Unsupervised	NA	Low risk	Low risk	Unclear	Unclear	Low risk	Low risk	Low risk	4	Short	1296	520	0.547527645	0.338809901
2	60. McCormack et al 2016	RCT	Achilles	Pain	NPRS- average of current pain, and worst and least pain in the last 24 hrs	Exercise only	Resistance	Resistance	Eccentric only	Eccentric Only	8	53.6	range: 42-69; 38-69	68.75	36.95	NA	Unsupervised	NA	Low risk	Low risk	Unclear	Unclear	Low risk	Low risk	Low risk	8	Short	1296	521	1.334598636	0.521606259
2	60. McCormack et al 2016	RCT	Achilles	Pain	NPRS- average of current pain, and worst and least pain in the last 24 hrs	Exercise only	Resistance	Resistance	Eccentric only	Eccentric Only	8	53.6	range: 42-69; 38-69	68.75	36.95	NA	Unsupervised	NA	Low risk	Low risk	Unclear	Unclear	Low risk	Low risk	Low risk	12	Short	1296	522	1.505701025	0.568921071
2	60. McCormack et al 2016	RCT	Achilles	Pain	NPRS- average of current pain, and worst and least pain in the last 24 hrs	Exercise only	Resistance	Resistance	Eccentric only	Eccentric Only	8	53.6	range: 42-69; 38-69	68.75	36.95	NA	Unsupervised	NA	Low risk	Low risk	Unclear	Unclear	Low risk	Low risk	Low risk	26	Medium	1296	523	2.155890104	0.75923625
2	60. McCormack et al 2016	RCT	Achilles	Pain	NPRS- average of current pain, and worst and least pain in the last 24 hrs	Exercise only	Resistance	Resistance	Eccentric only	Eccentric Only	8	53.6	range: 42-69; 38-69	68.75	36.95	NA	Unsupervised	NA	Low risk	Low risk	Unclear	Unclear	Low risk	Low risk	Low risk	52	Medium	1296	524	2.874520138	0.979925972
2	26. Dimitrios et al 2012	Quasi-experimental	Patellar	Disability	VISA-P	Multiple exercise types	Flexibility	Flexibility, Resistance	Static	Eccentric only, Static	22	26.71	4.715	27.90697674	NA	NA	Unsupervised	NA	Not applicable (quasi)	Not applicable (quasi)	Low risk	Low risk	Low risk	Unclear	High risk	4	Short	1297	525	1.253060619	0.264759575
2	26. Dimitrios et al 2012	Quasi-experimental	Patellar	Disability	VISA-P	Multiple exercise types	Flexibility	Flexibility, Resistance	Static	Eccentric only, Static	22	26.71	4.715	27.90697674	NA	NA	Unsupervised	NA	Not applicable (quasi)	Not applicable (quasi)	Low risk	Low risk	Low risk	Unclear	High risk	24	Medium	1297	526	1.491738832	0.296075265
2	100. Turgut et al 2017	RCT	Rotator cuff - subacromial impingement	Disability	SPADI- pain	Multiple exercise types	Resistance	Flexibility, Proprioception, Resistance	Concentric and eccentric	Concentric and eccentric, Static, Movement pattern retraining	15	36.45	17.5	46.66666667	24.75	2.925	Unsupervised	NA	Low risk	Unclear	Unclear	Unclear	High risk	Unclear	Low risk	6	Short	1298	527	1.203094778	0.322116453
2	100. Turgut et al 2017	RCT	Rotator cuff - subacromial impingement	Disability	SPADI- pain	Multiple exercise types	Resistance	Flexibility, Proprioception, Resistance	Concentric and eccentric	Concentric and eccentric, Static, Movement pattern retraining	15	36.45	17.5	46.66666667	24.75	2.925	Unsupervised	NA	Low risk	Unclear	Unclear	Unclear	High risk	Unclear	Low risk	12	Short	1298	528	1.68549323	0.404338076
2	100. Turgut et al 2017	RCT	Rotator cuff - subacromial impingement	Function	SPADI- disability	Multiple exercise types	Resistance	Flexibility, Proprioception, Resistance	Concentric and eccentric	Concentric and eccentric, Static, Movement pattern retraining	15	36.45	17.5	46.66666667	24.75	2.925	Unsupervised	NA	Low risk	Unclear	Unclear	Unclear	High risk	Unclear	Low risk	6	Short	1299	529	0.819138756	0.265474148
2	100. Turgut et al 2017	RCT	Rotator cuff - subacromial impingement	Function	SPADI- disability	Multiple exercise types	Resistance	Flexibility, Proprioception, Resistance	Concentric and eccentric	Concentric and eccentric, Static, Movement pattern retraining	15	36.45	17.5	46.66666667	24.75	2.925	Unsupervised	NA	Low risk	Unclear	Unclear	Unclear	High risk	Unclear	Low risk	12	Short	1299	530	1.236788942	0.327540739
2	100. Turgut et al 2017	RCT	Rotator cuff - subacromial impingement	Disability	SPADI	Multiple exercise types	Resistance	Flexibility, Proprioception, Resistance	Concentric and eccentric	Concentric and eccentric, Static, Movement pattern retraining	15	36.45	17.5	46.66666667	24.75	2.925	Unsupervised	NA	Low risk	Unclear	Unclear	Unclear	High risk	Unclear	Low risk	6	Short	1300	531	1.042793587	0.297198264
2	100. Turgut et al 2017	RCT	Rotator cuff - subacromial impingement	Disability	SPADI	Multiple exercise types	Resistance	Flexibility, Proprioception, Resistance	Concentric and eccentric	Concentric and eccentric, Static, Movement pattern retraining	15	36.45	17.5	46.66666667	24.75	2.925	Unsupervised	NA	Low risk	Unclear	Unclear	Unclear	High risk	Unclear	Low risk	12	Short	1300	532	1.520758835	0.37529833
2	100. Turgut et al 2017	RCT	Rotator cuff - subacromial impingement	Pain	VAS- rest	Multiple exercise types	Resistance	Flexibility, Proprioception, Resistance	Concentric and eccentric	Concentric and eccentric, Static, Movement pattern retraining	15	36.45	17.5	46.66666667	24.75	2.925	Unsupervised	NA	Low risk	Unclear	Unclear	Unclear	High risk	Unclear	Low risk	6	Short	1301	533	0.282111437	0.212429029
2	100. Turgut et al 2017	RCT	Rotator cuff - subacromial impingement	Pain	VAS- activity	Multiple exercise types	Resistance	Flexibility, Proprioception, Resistance	Concentric and eccentric	Concentric and eccentric, Static, Movement pattern retraining	15	36.45	17.5	46.66666667	24.75	2.925	Unsupervised	NA	Low risk	Unclear	Unclear	Unclear	High risk	Unclear	Low risk	6	Short	1302	534	1.364743083	0.348642659
2	100. Turgut et al 2017	RCT	Rotator cuff - subacromial impingement	Pain	VAS- activity	Multiple exercise types	Resistance	Flexibility, Proprioception, Resistance	Concentric and eccentric	Concentric and eccentric, Static, Movement pattern retraining	15	36.45	17.5	46.66666667	24.75	2.925	Unsupervised	NA	Low risk	Unclear	Unclear	Unclear	High risk	Unclear	Low risk	12	Short	1302	535	1.833359684	0.431036908
2	100. Turgut et al 2017	RCT	Rotator cuff - subacromial impingement	Pain	VAS- night pain	Multiple exercise types	Resistance	Flexibility, Proprioception, Resistance	Concentric and eccentric	Concentric and eccentric, Static, Movement pattern retraining	15	36.45	17.5	46.66666667	24.75	2.925	Unsupervised	NA	Low risk	Unclear	Unclear	Unclear	High risk	Unclear	Low risk	6	Short	1303	536	0.533398153	0.232185873
2	105. Vuvan et al 2020	RCT	Lateral elbow/tennis elbow	Disability	PRTEE	Multiple exercise types	Resistance	Flexibility, Resistance	Isometric	Isometric, Static	20	48.5	9	28	26.2	4	Unsupervised	NA	Low risk	Low risk	High risk	High risk	Low risk	Low risk	Low risk	12	Short	1304	537	1.29322314	0.28480316
2	105. Vuvan et al 2020	RCT	Lateral elbow/tennis elbow	Disability	PRTEE- pain	Multiple exercise types	Resistance	Flexibility, Resistance	Isometric	Isometric, Static	20	48.5	9	28	26.2	4	Unsupervised	NA	Low risk	Low risk	High risk	High risk	Low risk	Low risk	Low risk	12	Short	1305	538	1.4784	0.310680109
2	105. Vuvan et al 2020	RCT	Lateral elbow/tennis elbow	Function	PRTEE- specific activities	Multiple exercise types	Resistance	Flexibility, Resistance	Isometric	Isometric, Static	20	48.5	9	28	26.2	4	Unsupervised	NA	Low risk	Low risk	High risk	High risk	Low risk	Low risk	Low risk	12	Short	1306	539	0.805423729	0.224448638
2	105. Vuvan et al 2020	RCT	Lateral elbow/tennis elbow	Physical function capacity	Dynamometer- painfree grip strength	Multiple exercise types	Resistance	Flexibility, Resistance	Isometric	Isometric, Static	20	48.5	9	28	26.2	4	Unsupervised	NA	Low risk	Low risk	Low risk	Low risk	Low risk	Low risk	Low risk	12	Short	1308	540	0.97015873	0.243226419
2	105. Vuvan et al 2020	RCT	Lateral elbow/tennis elbow	Pain	NRS- resting pain	Multiple exercise types	Resistance	Flexibility, Resistance	Isometric	Isometric, Static	20	48.5	9	28	26.2	4	Unsupervised	NA	Low risk	Low risk	High risk	High risk	Low risk	Low risk	Low risk	12	Short	1309	541	0.698181818	0.21339145
2	105. Vuvan et al 2020	RCT	Lateral elbow/tennis elbow	Pain	NRS- worst pain	Multiple exercise types	Resistance	Flexibility, Resistance	Isometric	Isometric, Static	20	48.5	9	28	26.2	4	Unsupervised	NA	Low risk	Low risk	High risk	High risk	Low risk	Low risk	Low risk	12	Short	1310	542	1.386666667	0.297710065
2	87. Sevier et al 2015	RCT	Lateral elbow/tennis elbow	Disability	DASH	Multiple exercise types	Resistance	Flexibility, Resistance	Eccentric only	Eccentric Only, Static	44	46.95	6.55	57.94392523	NA	NA	Unsupervised	NA	Low risk	Unclear	High risk	High risk	High risk	Unclear	High risk	4	Short	1311	543	0.679644316	0.139597823
2	87. Sevier et al 2015	RCT	Lateral elbow/tennis elbow	Disability	DASH	Multiple exercise types	Resistance	Flexibility, Resistance	Eccentric only	Eccentric Only, Static	44	46.95	6.55	57.94392523	NA	NA	Unsupervised	NA	Low risk	Unclear	High risk	High risk	High risk	Unclear	High risk	8	Short	1311	544	0.699831771	0.140819724
2	87. Sevier et al 2015	RCT	Lateral elbow/tennis elbow	Disability	DASH	Multiple exercise types	Resistance	Flexibility, Resistance	Eccentric only	Eccentric Only, Static	44	46.95	6.55	57.94392523	NA	NA	Unsupervised	NA	Low risk	Unclear	High risk	High risk	High risk	Unclear	High risk	12	Short	1311	545	1.379476087	0.192919786
2	87. Sevier et al 2015	RCT	Lateral elbow/tennis elbow	Disability	DASH	Multiple exercise types	Resistance	Flexibility, Resistance	Eccentric only	Eccentric Only, Static	44	46.95	6.55	57.94392523	NA	NA	Unsupervised	NA	Low risk	Unclear	High risk	High risk	High risk	Unclear	High risk	26.07145714	Medium	1311	546	1.608267243	0.213608665
2	87. Sevier et al 2015	RCT	Lateral elbow/tennis elbow	Disability	DASH	Multiple exercise types	Resistance	Flexibility, Resistance	Eccentric only	Eccentric Only, Static	44	46.95	6.55	57.94392523	NA	NA	Unsupervised	NA	Low risk	Unclear	High risk	High risk	High risk	Unclear	High risk	52.14291429	Medium	1311	547	1.729391973	0.224950721
2	87. Sevier et al 2015	RCT	Lateral elbow/tennis elbow	Pain	VAS- activity	Multiple exercise types	Resistance	Flexibility, Resistance	Eccentric only	Eccentric Only, Static	44	46.95	6.55	57.94392523	NA	NA	Unsupervised	NA	Low risk	Unclear	High risk	High risk	High risk	Unclear	High risk	4	Short	1312	548	0.471578947	0.128609429
2	87. Sevier et al 2015	RCT	Lateral elbow/tennis elbow	Pain	VAS- activity	Multiple exercise types	Resistance	Flexibility, Resistance	Eccentric only	Eccentric Only, Static	44	46.95	6.55	57.94392523	NA	NA	Unsupervised	NA	Low risk	Unclear	High risk	High risk	High risk	Unclear	High risk	8	Short	1312	549	0.589473684	0.134460107
2	87. Sevier et al 2015	RCT	Lateral elbow/tennis elbow	Pain	VAS- activity	Multiple exercise types	Resistance	Flexibility, Resistance	Eccentric only	Eccentric Only, Static	44	46.95	6.55	57.94392523	NA	NA	Unsupervised	NA	Low risk	Unclear	High risk	High risk	High risk	Unclear	High risk	12	Short	1312	550	1.414736842	0.196036491
2	87. Sevier et al 2015	RCT	Lateral elbow/tennis elbow	Pain	VAS- activity	Multiple exercise types	Resistance	Flexibility, Resistance	Eccentric only	Eccentric Only, Static	44	46.95	6.55	57.94392523	NA	NA	Unsupervised	NA	Low risk	Unclear	High risk	High risk	High risk	Unclear	High risk	26.07145714	Medium	1312	551	1.807719298	0.232404116
2	87. Sevier et al 2015	RCT	Lateral elbow/tennis elbow	Pain	VAS- activity	Multiple exercise types	Resistance	Flexibility, Resistance	Eccentric only	Eccentric Only, Static	44	46.95	6.55	57.94392523	NA	NA	Unsupervised	NA	Low risk	Unclear	High risk	High risk	High risk	Unclear	High risk	52.14291429	Medium	1312	552	1.925614035	0.243776841
2	87. Sevier et al 2015	RCT	Lateral elbow/tennis elbow	Function	VAS- function	Multiple exercise types	Resistance	Flexibility, Resistance	Eccentric only	Eccentric Only, Static	44	46.95	6.55	57.94392523	NA	NA	Unsupervised	NA	Low risk	Unclear	High risk	High risk	High risk	Unclear	High risk	4	Short	1313	553	0.432280702	0.126898963
2	87. Sevier et al 2015	RCT	Lateral elbow/tennis elbow	Function	VAS- function	Multiple exercise types	Resistance	Flexibility, Resistance	Eccentric only	Eccentric Only, Static	44	46.95	6.55	57.94392523	NA	NA	Unsupervised	NA	Low risk	Unclear	High risk	High risk	High risk	Unclear	High risk	8	Short	1313	554	0.432280702	0.126898963
2	87. Sevier et al 2015	RCT	Lateral elbow/tennis elbow	Function	VAS- function	Multiple exercise types	Resistance	Flexibility, Resistance	Eccentric only	Eccentric Only, Static	44	46.95	6.55	57.94392523	NA	NA	Unsupervised	NA	Low risk	Unclear	High risk	High risk	High risk	Unclear	High risk	12	Short	1313	555	0.903859649	0.154453964
2	87. Sevier et al 2015	RCT	Lateral elbow/tennis elbow	Function	VAS- function	Multiple exercise types	Resistance	Flexibility, Resistance	Eccentric only	Eccentric Only, Static	44	46.95	6.55	57.94392523	NA	NA	Unsupervised	NA	Low risk	Unclear	High risk	High risk	High risk	Unclear	High risk	26.07145714	Medium	1313	556	1.296842105	0.185733575
2	87. Sevier et al 2015	RCT	Lateral elbow/tennis elbow	Function	VAS- function	Multiple exercise types	Resistance	Flexibility, Resistance	Eccentric only	Eccentric Only, Static	44	46.95	6.55	57.94392523	NA	NA	Unsupervised	NA	Low risk	Unclear	High risk	High risk	High risk	Unclear	High risk	52.14291429	Medium	1313	557	1.296842105	0.185733575
2	87. Sevier et al 2015	RCT	Lateral elbow/tennis elbow	Physical function capacity	Dynamometer- max grip strength	Multiple exercise types	Resistance	Flexibility, Resistance	Eccentric only	Eccentric Only, Static	44	46.95	6.55	57.94392523	NA	NA	Unsupervised	NA	Low risk	Unclear	Low risk	Low risk	High risk	Unclear	High risk	4	Short	1314	558	0.063795853	0.117703956
2	87. Sevier et al 2015	RCT	Lateral elbow/tennis elbow	Physical function capacity	Dynamometer- max grip strength	Multiple exercise types	Resistance	Flexibility, Resistance	Eccentric only	Eccentric Only, Static	44	46.95	6.55	57.94392523	NA	NA	Unsupervised	NA	Low risk	Unclear	Low risk	Low risk	High risk	Unclear	High risk	8	Short	1314	559	-0.009569378	0.117495837
2	87. Sevier et al 2015	RCT	Lateral elbow/tennis elbow	Physical function capacity	Dynamometer- max grip strength	Multiple exercise types	Resistance	Flexibility, Resistance	Eccentric only	Eccentric Only, Static	44	46.95	6.55	57.94392523	NA	NA	Unsupervised	NA	Low risk	Unclear	Low risk	Low risk	High risk	Unclear	High risk	12	Short	1314	560	0.146730463	0.118613016
2	68. Park et al 2010	RCT	Lateral elbow/tennis elbow	Pain	VAS- pain	Exercise only	Resistance	Resistance	Isometric	Isometric	16	50.15	NA	61.29032258	NA	NA	Unsupervised	NA	Low risk	Unclear	Unclear	Unclear	Unclear	Unclear	High risk	4.345242857	Short	1315	561	2.582577848	0.549874154
2	68. Park et al 2010	RCT	Lateral elbow/tennis elbow	Pain	VAS- pain	Exercise only	Resistance	Resistance	Isometric	Isometric	16	50.15	NA	61.29032258	NA	NA	Unsupervised	NA	Low risk	Unclear	Unclear	Unclear	Unclear	Unclear	High risk	13.03572857	Medium	1315	562	4.690579425	0.952786205
2	68. Park et al 2010	RCT	Lateral elbow/tennis elbow	Pain	VAS- pain	Exercise only	Resistance	Resistance	Isometric	Isometric	16	50.15	NA	61.29032258	NA	NA	Unsupervised	NA	Low risk	Unclear	Unclear	Unclear	Unclear	Unclear	High risk	26.07145714	Medium	1315	563	4.922349231	0.997889136
2	68. Park et al 2010	RCT	Lateral elbow/tennis elbow	Pain	VAS- pain	Exercise only	Resistance	Resistance	Isometric	Isometric	16	50.15	NA	61.29032258	NA	NA	Unsupervised	NA	Low risk	Unclear	Unclear	Unclear	Unclear	Unclear	High risk	52.14291429	Medium	1315	564	4.999605834	1.012942526
2	68. Park et al 2010	RCT	Lateral elbow/tennis elbow	Disability	MEPS	Exercise only	Resistance	Resistance	Isometric	Isometric	16	50.15	NA	61.29032258	NA	NA	Unsupervised	NA	Low risk	Unclear	Unclear	Unclear	Unclear	Unclear	High risk	4.345242857	Short	1316	565	0.869391825	0.262351602
2	68. Park et al 2010	RCT	Lateral elbow/tennis elbow	Disability	MEPS	Exercise only	Resistance	Resistance	Isometric	Isometric	16	50.15	NA	61.29032258	NA	NA	Unsupervised	NA	Low risk	Unclear	Unclear	Unclear	Unclear	Unclear	High risk	13.03572857	Medium	1316	566	2.329012961	0.503171533
2	68. Park et al 2010	RCT	Lateral elbow/tennis elbow	Disability	MEPS	Exercise only	Resistance	Resistance	Isometric	Isometric	16	50.15	NA	61.29032258	NA	NA	Unsupervised	NA	Low risk	Unclear	Unclear	Unclear	Unclear	Unclear	High risk	26.07145714	Medium	1316	567	2.384845464	0.513395158
2	68. Park et al 2010	RCT	Lateral elbow/tennis elbow	Disability	MEPS	Exercise only	Resistance	Resistance	Isometric	Isometric	16	50.15	NA	61.29032258	NA	NA	Unsupervised	NA	Low risk	Unclear	Unclear	Unclear	Unclear	Unclear	High risk	52.14291429	Medium	1316	568	2.560319043	0.545748185
2	33. Granviken et al 2015	RCT	Rotator cuff - subacromial impingement	Disability	SPADI	Multiple exercise types	Proprioception	Flexibility, Proprioception, Resistance	Movement pattern retraining	Movement pattern retraining, Concentric and eccentric, Static, Dynamic	21	47.9	9.9	48	NA	NA	Unsupervised	NA	Low risk	Low risk	Low risk	Low risk	Low risk	Low risk	Low risk	6	Short	1317	569	1.362869198	0.286343083
2	33. Granviken et al 2015	RCT	Rotator cuff - subacromial impingement	Disability	SPADI	Multiple exercise types	Proprioception	Flexibility, Proprioception, Resistance	Movement pattern retraining	Movement pattern retraining, Concentric and eccentric, Static, Dynamic	18	47.9	9.9	48	NA	NA	Unsupervised	NA	Low risk	Low risk	Low risk	Low risk	Low risk	Low risk	Low risk	26	Medium	1317	570	1.990049751	0.411786531
2	33. Granviken et al 2015	RCT	Rotator cuff - subacromial impingement	Pain	NRS- pain in last week	Multiple exercise types	Proprioception	Flexibility, Proprioception, Resistance	Movement pattern retraining	Movement pattern retraining, Concentric and eccentric, Static, Dynamic	21	47.9	9.9	48	NA	NA	Unsupervised	NA	Low risk	Low risk	Low risk	Low risk	Low risk	Low risk	Low risk	6	Short	1318	571	1.480038948	0.302369933
2	33. Granviken et al 2015	RCT	Rotator cuff - subacromial impingement	ROM - Shoulder	ROM- flexion	Multiple exercise types	Proprioception	Flexibility, Proprioception, Resistance	Movement pattern retraining	Movement pattern retraining, Concentric and eccentric, Static, Dynamic	21	47.9	9.9	48	NA	NA	Unsupervised	NA	Low risk	Low risk	Low risk	Low risk	Low risk	Low risk	Low risk	6	Short	1319	572	0.183242917	0.174160342
2	33. Granviken et al 2015	RCT	Rotator cuff - subacromial impingement	ROM - Shoulder	ROM- abduction	Multiple exercise types	Proprioception	Flexibility, Proprioception, Resistance	Movement pattern retraining	Movement pattern retraining, Concentric and eccentric, Static, Dynamic	21	47.9	9.9	48	NA	NA	Unsupervised	NA	Low risk	Low risk	Low risk	Low risk	Low risk	Low risk	Low risk	6	Short	1320	573	0.222005842	0.175433107
2	33. Granviken et al 2015	RCT	Rotator cuff - subacromial impingement	ROM - Shoulder	ROM- ext rotation	Multiple exercise types	Proprioception	Flexibility, Proprioception, Resistance	Movement pattern retraining	Movement pattern retraining, Concentric and eccentric, Static, Dynamic	21	47.9	9.9	48	NA	NA	Unsupervised	NA	Low risk	Low risk	Low risk	Low risk	Low risk	Low risk	Low risk	6	Short	1321	574	-0.048101266	0.17159912
2	33. Granviken et al 2015	RCT	Rotator cuff - subacromial impingement	ROM - Shoulder	ROM- int rotation	Multiple exercise types	Proprioception	Flexibility, Proprioception, Resistance	Movement pattern retraining	Movement pattern retraining, Concentric and eccentric, Static, Dynamic	21	47.9	9.9	48	NA	NA	Unsupervised	NA	Low risk	Low risk	Low risk	Low risk	Low risk	Low risk	Low risk	6	Short	1322	575	0.064135021	0.17174758
2	31. Gatz et al 2020	RCT	Achilles	Disability	VISA-A	Exercise only	Resistance	Resistance	Eccentric only	Eccentric Only	20	50	12.045	35.71428571	25	4.275	Unsupervised	NA	Low risk	Low risk	Low risk	Low risk	Unclear	Unclear	High risk	4.345242857	Short	1323	576	0.64295612	0.208115857
2	31. Gatz et al 2020	RCT	Achilles	Disability	VISA-A	Exercise only	Resistance	Resistance	Eccentric only	Eccentric Only	20	50	12.045	35.71428571	25	4.275	Unsupervised	NA	Low risk	Low risk	Low risk	Low risk	Unclear	Unclear	High risk	13.03572857	Medium	1323	577	1.608498845	0.329514247
2	31. Gatz et al 2020	RCT	Achilles	Disability	Roles & Maudsley (coded 1= poor/acceptable)	Exercise only	Resistance	Resistance	Eccentric only	Eccentric Only	20	50	12.045	35.71428571	25	4.275	Unsupervised	NA	Low risk	Low risk	Low risk	Low risk	Unclear	Unclear	High risk	4.345242857	Short	1324	578	1.094212556	0.25854963
2	31. Gatz et al 2020	RCT	Achilles	Disability	Roles & Maudsley (coded 1= poor/acceptable)	Exercise only	Resistance	Resistance	Eccentric only	Eccentric Only	20	50	12.045	35.71428571	25	4.275	Unsupervised	NA	Low risk	Low risk	Low risk	Low risk	Unclear	Unclear	High risk	13.03572857	Medium	1324	579	1.778095403	0.354716499
2	31. Gatz et al 2020	RCT	Achilles	Disability	AOFAS	Exercise only	Resistance	Resistance	Eccentric only	Eccentric Only	20	50	12.045	35.71428571	25	4.275	Unsupervised	NA	Low risk	Low risk	Low risk	Low risk	Unclear	Unclear	High risk	4.345242857	Short	1325	580	0.457869634	0.192859993
2	31. Gatz et al 2020	RCT	Achilles	Function	AOFAS	Exercise only	Resistance	Resistance	Eccentric only	Eccentric Only	20	50	12.045	35.71428571	25	4.275	Unsupervised	NA	Low risk	Low risk	Low risk	Low risk	Unclear	Unclear	High risk	13.03572857	Medium	1325	581	1.06836248	0.255283203
2	40. Jonsson 2009	Quasi-experimental	Achilles	Pain	VAS- activity	Exercise only	Resistance	Resistance	Eccentric only	Eccentric Only	8	25	NA	13.33333333	NA	NA	Unsupervised	NA	NA	NA	NA	NA	NA	NA	NA	12	Short	1326	582	2.185316596	0.768116457
2	40. Jonsson 2009	Quasi-experimental	Achilles	Disability	VISA	Exercise only	Resistance	Resistance	Eccentric only	Eccentric Only	8	25	NA	13.33333333	NA	NA	Unsupervised	NA	NA	NA	NA	NA	NA	NA	NA	12	Short	1327	583	2.896140272	0.986661692
2	74. Peterson et al 2014	RCT	Lateral elbow/tennis elbow	Pain	VAS- pain maximum voluntary contraction	Exercise only	Resistance	Resistance	Eccentric only	Eccentric Only	60	47.9	8.05	47.5	NA	NA	Unsupervised	NA	Low risk	Unclear	Low risk	High risk	Low risk	Low risk	Low risk	4.345242857	Short	1328	584	0.534137822	0.112281452
2	74. Peterson et al 2014	RCT	Lateral elbow/tennis elbow	Pain	VAS- pain maximum voluntary contraction	Exercise only	Resistance	Resistance	Eccentric only	Eccentric Only	60	47.9	8.05	47.5	NA	NA	Unsupervised	NA	Low risk	Unclear	Low risk	High risk	Low risk	Low risk	Low risk	8.690485714	Short	1328	585	0.784630041	0.124593682
2	74. Peterson et al 2014	RCT	Lateral elbow/tennis elbow	Pain	VAS- pain maximum voluntary contraction	Exercise only	Resistance	Resistance	Eccentric only	Eccentric Only	60	47.9	8.05	47.5	NA	NA	Unsupervised	NA	Low risk	Unclear	Low risk	High risk	Low risk	Low risk	Low risk	13.03572857	Medium	1328	586	0.983550333	0.136487563
2	74. Peterson et al 2014	RCT	Lateral elbow/tennis elbow	Pain	VAS- pain maximum voluntary contraction	Exercise only	Resistance	Resistance	Eccentric only	Eccentric Only	60	47.9	8.05	47.5	NA	NA	Unsupervised	NA	Low risk	Unclear	Low risk	High risk	Low risk	Low risk	Low risk	26.07145714	Medium	1328	587	1.234042553	0.153404926
2	74. Peterson et al 2014	RCT	Lateral elbow/tennis elbow	Pain	VAS- pain maximum voluntary contraction	Exercise only	Resistance	Resistance	Eccentric only	Eccentric Only	60	47.9	8.05	47.5	NA	NA	Unsupervised	NA	Low risk	Unclear	Low risk	High risk	Low risk	Low risk	Low risk	52.14291429	Medium	1328	588	1.403493172	0.165767523
2	74. Peterson et al 2014	RCT	Lateral elbow/tennis elbow	Pain	VAS- pain during maximum muscle elongation	Exercise only	Resistance	Resistance	Eccentric only	Eccentric Only	60	47.9	8.05	47.5	NA	NA	Unsupervised	NA	Low risk	Unclear	Low risk	High risk	Low risk	Low risk	Low risk	4.345242857	Short	1329	589	0.628904649	0.116534105
2	74. Peterson et al 2014	RCT	Lateral elbow/tennis elbow	Pain	VAS- pain during maximum muscle elongation	Exercise only	Resistance	Resistance	Eccentric only	Eccentric Only	60	47.9	8.05	47.5	NA	NA	Unsupervised	NA	Low risk	Unclear	Low risk	High risk	Low risk	Low risk	Low risk	8.690485714	Short	1329	590	0.881197794	0.130168377
2	74. Peterson et al 2014	RCT	Lateral elbow/tennis elbow	Pain	VAS- pain during maximum muscle elongation	Exercise only	Resistance	Resistance	Eccentric only	Eccentric Only	60	47.9	8.05	47.5	NA	NA	Unsupervised	NA	Low risk	Unclear	Low risk	High risk	Low risk	Low risk	Low risk	13.03572857	Medium	1329	591	1.016485422	0.138601619
2	74. Peterson et al 2014	RCT	Lateral elbow/tennis elbow	Pain	VAS- pain during maximum muscle elongation	Exercise only	Resistance	Resistance	Eccentric only	Eccentric Only	60	47.9	8.05	47.5	NA	NA	Unsupervised	NA	Low risk	Unclear	Low risk	High risk	Low risk	Low risk	Low risk	26.07145714	Medium	1329	592	1.188337273	0.150185233
2	74. Peterson et al 2014	RCT	Lateral elbow/tennis elbow	Pain	VAS- pain during maximum muscle elongation	Exercise only	Resistance	Resistance	Eccentric only	Eccentric Only	60	47.9	8.05	47.5	NA	NA	Unsupervised	NA	Low risk	Unclear	Low risk	High risk	Low risk	Low risk	Low risk	52.14291429	Medium	1329	593	1.312655634	0.159061616
2	74. Peterson et al 2014	RCT	Lateral elbow/tennis elbow	Physical function capacity	Muscle strength	Exercise only	Resistance	Resistance	Eccentric only	Eccentric Only	60	47.9	8.05	47.5	NA	NA	Unsupervised	NA	Low risk	Unclear	Low risk	High risk	Low risk	Low risk	Low risk	4.345242857	Short	1330	594	0.203714961	0.102248095
2	74. Peterson et al 2014	RCT	Lateral elbow/tennis elbow	Physical function capacity	Muscle strength	Exercise only	Resistance	Resistance	Eccentric only	Eccentric Only	60	47.9	8.05	47.5	NA	NA	Unsupervised	NA	Low risk	Unclear	Low risk	High risk	Low risk	Low risk	Low risk	8.690485714	Short	1330	595	0.311169007	0.104609412
2	74. Peterson et al 2014	RCT	Lateral elbow/tennis elbow	Physical function capacity	Muscle strength	Exercise only	Resistance	Resistance	Eccentric only	Eccentric Only	60	47.9	8.05	47.5	NA	NA	Unsupervised	NA	Low risk	Unclear	Low risk	High risk	Low risk	Low risk	Low risk	13.03572857	Medium	1330	596	0.17685145	0.101805769
2	74. Peterson et al 2014	RCT	Lateral elbow/tennis elbow	Physical function capacity	Muscle strength	Exercise only	Resistance	Resistance	Eccentric only	Eccentric Only	60	47.9	8.05	47.5	NA	NA	Unsupervised	NA	Low risk	Unclear	Low risk	High risk	Low risk	Low risk	Low risk	26.07145714	Medium	1330	597	0.196999083	0.102131845
2	74. Peterson et al 2014	RCT	Lateral elbow/tennis elbow	Physical function capacity	Muscle strength	Exercise only	Resistance	Resistance	Eccentric only	Eccentric Only	60	47.9	8.05	47.5	NA	NA	Unsupervised	NA	Low risk	Unclear	Low risk	High risk	Low risk	Low risk	Low risk	52.14291429	Medium	1330	598	0.199237709	0.102170176
2	74. Peterson et al 2014	RCT	Lateral elbow/tennis elbow	Disability	DASH	Exercise only	Resistance	Resistance	Eccentric only	Eccentric Only	60	47.9	8.05	47.5	NA	NA	Unsupervised	NA	Low risk	Unclear	Low risk	High risk	Low risk	Low risk	Low risk	13.03572857	Medium	1331	599	0.761887142	0.123341243
2	74. Peterson et al 2014	RCT	Lateral elbow/tennis elbow	Disability	DASH	Exercise only	Resistance	Resistance	Eccentric only	Eccentric Only	60	47.9	8.05	47.5	NA	NA	Unsupervised	NA	Low risk	Unclear	Low risk	High risk	Low risk	Low risk	Low risk	26.07145714	Medium	1331	600	0.906753006	0.131708768
2	74. Peterson et al 2014	RCT	Lateral elbow/tennis elbow	Disability	DASH	Exercise only	Resistance	Resistance	Eccentric only	Eccentric Only	60	47.9	8.05	47.5	NA	NA	Unsupervised	NA	Low risk	Unclear	Low risk	High risk	Low risk	Low risk	Low risk	52.14291429	Medium	1331	601	1.030157262	0.13948995
2	74. Peterson et al 2014	RCT	Lateral elbow/tennis elbow	QoL	Gothenburg QoL- activity score	Exercise only	Resistance	Resistance	Eccentric only	Eccentric Only	60	47.9	8.05	47.5	NA	NA	Unsupervised	NA	Low risk	Unclear	Low risk	High risk	Low risk	Low risk	Low risk	13.03572857	Medium	1332	602	-0.300462535	0.104332716
2	74. Peterson et al 2014	RCT	Lateral elbow/tennis elbow	QoL	Gothenburg QoL- activity score	Exercise only	Resistance	Resistance	Eccentric only	Eccentric Only	60	47.9	8.05	47.5	NA	NA	Unsupervised	NA	Low risk	Unclear	Low risk	High risk	Low risk	Low risk	Low risk	26.07145714	Medium	1332	603	-0.457847672	0.109265661
2	74. Peterson et al 2014	RCT	Lateral elbow/tennis elbow	QoL	Gothenburg QoL- activity score	Exercise only	Resistance	Resistance	Eccentric only	Eccentric Only	60	47.9	8.05	47.5	NA	NA	Unsupervised	NA	Low risk	Unclear	Low risk	High risk	Low risk	Low risk	Low risk	52.14291429	Medium	1332	604	-0.500770891	0.110915537
2	74. Peterson et al 2014	RCT	Lateral elbow/tennis elbow	QoL	Gothenburg QoL- wellbeing	Exercise only	Resistance	Resistance	Eccentric only	Eccentric Only	60	47.9	8.05	47.5	NA	NA	Unsupervised	NA	Low risk	Unclear	Low risk	High risk	Low risk	Low risk	Low risk	13.03572857	Medium	1333	605	-0.131631206	0.101199101
2	74. Peterson et al 2014	RCT	Lateral elbow/tennis elbow	QoL	Gothenburg QoL- wellbeing	Exercise only	Resistance	Resistance	Eccentric only	Eccentric Only	60	47.9	8.05	47.5	NA	NA	Unsupervised	NA	Low risk	Unclear	Low risk	High risk	Low risk	Low risk	Low risk	26.07145714	Medium	1333	606	-0.197446809	0.102139477
2	74. Peterson et al 2014	RCT	Lateral elbow/tennis elbow	QoL	Gothenburg QoL- wellbeing	Exercise only	Resistance	Resistance	Eccentric only	Eccentric Only	60	47.9	8.05	47.5	NA	NA	Unsupervised	NA	Low risk	Unclear	Low risk	High risk	Low risk	Low risk	Low risk	52.14291429	Medium	1333	607	-0.131631206	0.101199101
2	74. Peterson et al 2014	RCT	Lateral elbow/tennis elbow	QoL	Gothenburg QoL- complaint	Exercise only	Resistance	Resistance	Eccentric only	Eccentric Only	60	47.9	8.05	47.5	NA	NA	Unsupervised	NA	Low risk	Unclear	Low risk	High risk	Low risk	Low risk	Low risk	13.03572857	Medium	1334	608	-0.357446809	0.10590706
2	74. Peterson et al 2014	RCT	Lateral elbow/tennis elbow	QoL	Gothenburg QoL- complaint	Exercise only	Resistance	Resistance	Eccentric only	Eccentric Only	60	47.9	8.05	47.5	NA	NA	Unsupervised	NA	Low risk	Unclear	Low risk	High risk	Low risk	Low risk	Low risk	26.07145714	Medium	1334	609	-0.340425532	0.105410782
2	74. Peterson et al 2014	RCT	Lateral elbow/tennis elbow	QoL	Gothenburg QoL- complaint	Exercise only	Resistance	Resistance	Eccentric only	Eccentric Only	60	47.9	8.05	47.5	NA	NA	Unsupervised	NA	Low risk	Unclear	Low risk	High risk	Low risk	Low risk	Low risk	52.14291429	Medium	1334	610	-0.408510638	0.107524962
2	47. Knobloch et al 2007	RCT	Achilles	Pain	VAS- peak exercise	Exercise only	Resistance	Resistance	Eccentric only	Eccentric Only	15	32.5	11	45	23.85	3	Unsupervised	NA	Unclear	Unclear	High risk	Low risk	Unclear	Unclear	High risk	12	Short	1335	611	0.652037618	0.244824002
2	80. Romero-Morales et al 2020	RCT	Achilles	Disability	VISA-A	Multiple exercise types	Vibration	Resistance, Vibration	Vibration	Eccentric Only, Vibration	30	41.6	8.7	26	25	2.45	Unsupervised	NA	Unclear	Unclear	Unclear	Unclear	Low risk	Low risk	High risk	4	Short	1336	612	0.598865784	0.164638091
2	80. Romero-Morales et al 2020	RCT	Achilles	Disability	VISA-A	Multiple exercise types	Vibration	Resistance, Vibration	Vibration	Eccentric Only, Vibration	30	41.6	8.7	26	25	2.45	Unsupervised	NA	Unclear	Unclear	Unclear	Unclear	Low risk	Low risk	High risk	12	Short	1336	613	1.252173913	0.223158808
2	52. Littlewood et al 2016	RCT	Rotator cuff - subacromial impingement	Disability	SPADI	Exercise only	Resistance	Resistance	Concentric and eccentric	Concentric and eccentric, Isometric	27	54.7	NA	50.25	NA	NA	Unsupervised	NA	Low risk	Low risk	High risk	High risk	Unclear	Unclear	High risk	13.03572857	Medium	1337	614	0.885988647	0.198219285
2	52. Littlewood et al 2016	RCT	Rotator cuff - subacromial impingement	Disability	SPADI	Exercise only	Resistance	Resistance	Concentric and eccentric	Concentric and eccentric, Isometric	23	54.7	NA	50.25	NA	NA	Unsupervised	NA	Low risk	Low risk	High risk	High risk	Unclear	Unclear	High risk	26.07145714	Medium	1337	615	1.714716412	0.318697543
2	52. Littlewood et al 2016	RCT	Rotator cuff - subacromial impingement	Disability	SPADI	Exercise only	Resistance	Resistance	Concentric and eccentric	Concentric and eccentric, Isometric	20	54.7	NA	50.25	NA	NA	Unsupervised	NA	Low risk	Low risk	High risk	High risk	Unclear	Unclear	High risk	39.10718571	Medium	1337	616	1.830819672	0.362679741
2	52. Littlewood et al 2016	RCT	Rotator cuff - subacromial impingement	Function	SF-36 Physical functioning	Exercise only	Resistance	Resistance	Concentric and eccentric	Concentric and eccentric, Isometric	27	54.7	NA	50.25	NA	NA	Unsupervised	NA	Low risk	Low risk	High risk	High risk	Unclear	Unclear	High risk	13.03572857	Medium	1338	617	-0.146709817	0.152142223
2	52. Littlewood et al 2016	RCT	Rotator cuff - subacromial impingement	Function	SF-36 Physical functioning	Exercise only	Resistance	Resistance	Concentric and eccentric	Concentric and eccentric, Isometric	23	54.7	NA	50.25	NA	NA	Unsupervised	NA	Low risk	Low risk	High risk	High risk	Unclear	Unclear	High risk	26.07145714	Medium	1338	618	0.025747126	0.163608163
2	52. Littlewood et al 2016	RCT	Rotator cuff - subacromial impingement	Function	SF-36 Physical functioning	Exercise only	Resistance	Resistance	Concentric and eccentric	Concentric and eccentric, Isometric	20	54.7	NA	50.25	NA	NA	Unsupervised	NA	Low risk	Low risk	High risk	High risk	Unclear	Unclear	High risk	39.10718571	Medium	1338	619	-0.149333333	0.177680173
2	52. Littlewood et al 2016	RCT	Rotator cuff - subacromial impingement	Disability	SF-36 Bodily pain	Exercise only	Resistance	Resistance	Concentric and eccentric	Concentric and eccentric, Isometric	27	54.7	NA	50.25	NA	NA	Unsupervised	NA	Low risk	Low risk	High risk	High risk	Unclear	Unclear	High risk	13.03572857	Medium	1339	620	0.673059741	0.179642048
2	52. Littlewood et al 2016	RCT	Rotator cuff - subacromial impingement	Disability	SF-36 Bodily pain	Exercise only	Resistance	Resistance	Concentric and eccentric	Concentric and eccentric, Isometric	23	54.7	NA	50.25	NA	NA	Unsupervised	NA	Low risk	Low risk	High risk	High risk	Unclear	Unclear	High risk	26.07145714	Medium	1339	621	1.273535012	0.26080883
2	43. Ketola et al 2013	RCT	Rotator cuff - subacromial impingement	Pain	VAS- pain	Multiple exercise types	Flexibility	Flexibility, Resistance	Dynamic	Dynamic, Concentric and eccentric	70	47.1	NA	62.85714286	NA	NA	Unsupervised	NA	Low risk	Low risk	High risk	Low risk	Low risk	Unclear	Low risk	104.2858286	Long	1340	622	1.875225678	0.18714372
2	43. Ketola et al 2013	RCT	Rotator cuff - subacromial impingement	Pain	VAS- pain	Multiple exercise types	Flexibility	Flexibility, Resistance	Dynamic	Dynamic, Concentric and eccentric	70	47.1	NA	62.85714286	NA	NA	Unsupervised	NA	Low risk	Low risk	High risk	Low risk	Low risk	Unclear	Low risk	260.7145714	Long	1340	623	2.239852893	0.215132635
2	43. Ketola et al 2013	RCT	Rotator cuff - subacromial impingement	Disability	VAS- disability	Multiple exercise types	Flexibility	Flexibility, Resistance	Dynamic	Dynamic, Concentric and eccentric	70	47.1	NA	62.85714286	NA	NA	Unsupervised	NA	Low risk	Low risk	High risk	Low risk	Low risk	Unclear	Low risk	104.2858286	Long	1341	624	2.285431746	0.218700186
2	43. Ketola et al 2013	RCT	Rotator cuff - subacromial impingement	Disability	VAS- disability	Multiple exercise types	Flexibility	Flexibility, Resistance	Dynamic	Dynamic, Concentric and eccentric	70	47.1	NA	62.85714286	NA	NA	Unsupervised	NA	Low risk	Low risk	High risk	Low risk	Low risk	Unclear	Low risk	260.7145714	Long	1341	625	2.754238258	0.25604406
2	43. Ketola et al 2013	RCT	Rotator cuff - subacromial impingement	Pain	VAS- night pain	Multiple exercise types	Flexibility	Flexibility, Resistance	Dynamic	Dynamic, Concentric and eccentric	70	47.1	NA	62.85714286	NA	NA	Unsupervised	NA	Low risk	Low risk	High risk	Low risk	Low risk	Unclear	Low risk	104.2858286	Long	1343	626	1.781464112	0.180138918
2	43. Ketola et al 2013	RCT	Rotator cuff - subacromial impingement	Pain	VAS- night pain	Multiple exercise types	Flexibility	Flexibility, Resistance	Dynamic	Dynamic, Concentric and eccentric	70	47.1	NA	62.85714286	NA	NA	Unsupervised	NA	Low risk	Low risk	High risk	Low risk	Low risk	Unclear	Low risk	260.7145714	Long	1343	627	2.203389823	0.212288299
2	43. Ketola et al 2013	RCT	Rotator cuff - subacromial impingement	Disability	SDQ	Multiple exercise types	Flexibility	Flexibility, Resistance	Dynamic	Dynamic, Concentric and eccentric	70	47.1	NA	62.85714286	NA	NA	Unsupervised	NA	Low risk	Low risk	High risk	Low risk	Low risk	Unclear	Low risk	104.2858286	Long	1344	628	2.329967536	0.222198534
2	43. Ketola et al 2013	RCT	Rotator cuff - subacromial impingement	Disability	SDQ	Multiple exercise types	Flexibility	Flexibility, Resistance	Dynamic	Dynamic, Concentric and eccentric	70	47.1	NA	62.85714286	NA	NA	Unsupervised	NA	Low risk	Low risk	High risk	Low risk	Low risk	Unclear	Low risk	260.7145714	Long	1344	629	2.826902263	0.261919313
2	15. Breda et al 2020	RCT	Patellar	Disability	VISA-P	Multiple exercise types	Resistance	Plyometric, Resistance	Isometric	Isometric, Concentric and eccentric, Plyometric	38	24	3.85	23.68421053	23.95	2.85	Unsupervised	NA	Low risk	Low risk	High risk	Low risk	Low risk	High risk	High risk	12	Short	1345	630	1.211403645	0.192872864
2	15. Breda et al 2020	RCT	Patellar	Disability	VISA-P	Multiple exercise types	Resistance	Plyometric, Resistance	Isometric	Isometric, Concentric and eccentric, Plyometric	38	24	3.85	23.68421053	23.95	2.85	Unsupervised	NA	Low risk	Low risk	High risk	Low risk	Low risk	High risk	High risk	24	Medium	1345	631	2.078828478	0.279993419
2	27. Dimitrios et al 2013	RCT	Lateral elbow/tennis elbow	Pain	VAS- pain over 24hr	Multiple exercise types	Resistance	Flexibility, Resistance	Isometric	Isometric, Concentric and eccentric, Static, Dynamic	30	47.57	5.895	36.66666667	NA	NA	Unsupervised	NA	High risk	High risk	High risk	Low risk	Low risk	Unclear	High risk	12	Short	1347	632	5.906956781	0.821689694
2	27. Dimitrios et al 2013	RCT	Lateral elbow/tennis elbow	Pain	VAS- pain over 24hr	Multiple exercise types	Resistance	Flexibility, Resistance	Isometric	Isometric, Concentric and eccentric, Static, Dynamic	30	47.57	5.895	36.66666667	NA	NA	Unsupervised	NA	High risk	High risk	High risk	Low risk	Low risk	Unclear	High risk	24	Medium	1347	633	6.084165485	0.845606995
2	27. Dimitrios et al 2013	RCT	Lateral elbow/tennis elbow	Function	VAS- function	Multiple exercise types	Resistance	Flexibility, Resistance	Isometric	Isometric, Concentric and eccentric, Static, Dynamic	30	47.57	5.895	36.66666667	NA	NA	Unsupervised	NA	High risk	High risk	High risk	Low risk	Low risk	Unclear	High risk	12	Short	1348	634	2.190636204	0.332314602
2	27. Dimitrios et al 2013	RCT	Lateral elbow/tennis elbow	Function	VAS- function	Multiple exercise types	Resistance	Flexibility, Resistance	Isometric	Isometric, Concentric and eccentric, Static, Dynamic	30	47.57	5.895	36.66666667	NA	NA	Unsupervised	NA	High risk	High risk	High risk	Low risk	Low risk	Unclear	High risk	24	Medium	1348	635	2.260338265	0.340962038
2	82. Rompe et al 2008	RCT	Achilles	Disability	VISA-A	Exercise only	Resistance	Resistance	Eccentric only	Eccentric Only	25	39.8	11	60	NA	NA	Unsupervised	NA	Low risk	Low risk	Unclear	Low risk	Low risk	Unclear	Unclear	12	Short	1350	636	1.23358396	0.244340781
2	37. Hotta et al 2020	RCT	Rotator cuff - subacromial impingement	Disability	SPADI	Exercise only	Resistance	Resistance	Concentric and eccentric	Concentric and eccentric, isometric	30	49	9	70	28.9	4.65	Supervised	Clinic	Low risk	Low risk	High risk	Low risk	Low risk	Low risk	High risk	4	Short	1353	637	0.714555766	0.173081613
2	37. Hotta et al 2020	RCT	Rotator cuff - subacromial impingement	Disability	SPADI	Exercise only	Resistance	Resistance	Concentric and eccentric	Concentric and eccentric, isometric	30	49	9	70	28.9	4.65	Supervised	Clinic	Low risk	Low risk	High risk	Low risk	Low risk	Low risk	High risk	8	Short	1353	638	1.386767486	0.237624444
2	37. Hotta et al 2020	RCT	Rotator cuff - subacromial impingement	Disability	SPADI	Exercise only	Resistance	Resistance	Concentric and eccentric	Concentric and eccentric, isometric	30	49	9	70	28.9	4.65	Supervised	Clinic	Low risk	Low risk	High risk	Low risk	Low risk	Low risk	High risk	16	Medium	1353	639	1.61436673	0.263218261
2	37. Hotta et al 2020	RCT	Rotator cuff - subacromial impingement	Pain	NPRS	Exercise only	Resistance	Resistance	Concentric and eccentric	Concentric and eccentric, isometric	30	49	9	70	28.9	4.65	Supervised	Clinic	Low risk	Low risk	High risk	Low risk	Low risk	Low risk	High risk	4	Short	1354	640	0.263219741	0.14722618
2	37. Hotta et al 2020	RCT	Rotator cuff - subacromial impingement	Pain	NPRS	Exercise only	Resistance	Resistance	Concentric and eccentric	Concentric and eccentric, isometric	30	49	9	70	28.9	4.65	Supervised	Clinic	Low risk	Low risk	High risk	Low risk	Low risk	Low risk	High risk	8	Short	1354	641	0.500117509	0.158332322
2	37. Hotta et al 2020	RCT	Rotator cuff - subacromial impingement	Pain	NPRS	Exercise only	Resistance	Resistance	Concentric and eccentric	Concentric and eccentric, isometric	30	49	9	70	28.9	4.65	Supervised	Clinic	Low risk	Low risk	High risk	Low risk	Low risk	Low risk	High risk	16	Medium	1354	642	0.842303173	0.183547236
2	37. Hotta et al 2020	RCT	Rotator cuff - subacromial impingement	ROM - Shoulder	ROM- flexion	Exercise only	Resistance	Resistance	Concentric and eccentric	Concentric and eccentric, isometric	30	49	9	70	28.9	4.65	Supervised	Clinic	Low risk	Low risk	High risk	Low risk	Low risk	Low risk	High risk	4	Short	1355	643	0.210792138	0.145633716
2	37. Hotta et al 2020	RCT	Rotator cuff - subacromial impingement	ROM - Shoulder	ROM- flexion	Exercise only	Resistance	Resistance	Concentric and eccentric	Concentric and eccentric, isometric	30	49	9	70	28.9	4.65	Supervised	Clinic	Low risk	Low risk	High risk	Low risk	Low risk	Low risk	High risk	8	Short	1355	644	0.413579512	0.153574988
2	37. Hotta et al 2020	RCT	Rotator cuff - subacromial impingement	ROM - Shoulder	ROM- flexion	Exercise only	Resistance	Resistance	Concentric and eccentric	Concentric and eccentric, isometric	30	49	9	70	28.9	4.65	Supervised	Clinic	Low risk	Low risk	High risk	Low risk	Low risk	Low risk	High risk	16	Medium	1355	645	0.376223943	0.151761663
2	37. Hotta et al 2020	RCT	Rotator cuff - subacromial impingement	ROM - Shoulder	ROM- abduction	Exercise only	Resistance	Resistance	Concentric and eccentric	Concentric and eccentric, isometric	30	49	9	70	28.9	4.65	Supervised	Clinic	Low risk	Low risk	High risk	Low risk	Low risk	Low risk	High risk	4	Short	1356	646	0.35391535	0.150751214
2	37. Hotta et al 2020	RCT	Rotator cuff - subacromial impingement	ROM - Shoulder	ROM- abduction	Exercise only	Resistance	Resistance	Concentric and eccentric	Concentric and eccentric, isometric	30	49	9	70	28.9	4.65	Supervised	Clinic	Low risk	Low risk	High risk	Low risk	Low risk	Low risk	High risk	8	Short	1356	647	0.581247838	0.163448849
2	37. Hotta et al 2020	RCT	Rotator cuff - subacromial impingement	ROM - Shoulder	ROM- abduction	Exercise only	Resistance	Resistance	Concentric and eccentric	Concentric and eccentric, isometric	30	49	9	70	28.9	4.65	Supervised	Clinic	Low risk	Low risk	High risk	Low risk	Low risk	Low risk	High risk	16	Medium	1356	648	0.462414946	0.156166878
2	37. Hotta et al 2020	RCT	Rotator cuff - subacromial impingement	ROM - Shoulder	ROM- ext rotation	Exercise only	Resistance	Resistance	Concentric and eccentric	Concentric and eccentric, isometric	30	49	9	70	28.9	4.65	Supervised	Clinic	Low risk	Low risk	High risk	Low risk	Low risk	Low risk	High risk	4	Short	1357	649	-0.076297335	0.143124322
2	37. Hotta et al 2020	RCT	Rotator cuff - subacromial impingement	ROM - Shoulder	ROM- ext rotation	Exercise only	Resistance	Resistance	Concentric and eccentric	Concentric and eccentric, isometric	30	49	9	70	28.9	4.65	Supervised	Clinic	Low risk	Low risk	High risk	Low risk	Low risk	Low risk	High risk	8	Short	1357	650	0.251332398	0.146835829
2	37. Hotta et al 2020	RCT	Rotator cuff - subacromial impingement	ROM - Shoulder	ROM- ext rotation	Exercise only	Resistance	Resistance	Concentric and eccentric	Concentric and eccentric, isometric	30	49	9	70	28.9	4.65	Supervised	Clinic	Low risk	Low risk	High risk	Low risk	Low risk	Low risk	High risk	16	Medium	1357	651	0.148106592	0.144176899
2	37. Hotta et al 2020	RCT	Rotator cuff - subacromial impingement	ROM - Shoulder	ROM- int rotation	Exercise only	Resistance	Resistance	Concentric and eccentric	Concentric and eccentric, isometric	30	49	9	70	28.9	4.65	Supervised	Clinic	Low risk	Low risk	High risk	Low risk	Low risk	Low risk	High risk	4	Short	1358	652	0.282555019	0.147897208
2	37. Hotta et al 2020	RCT	Rotator cuff - subacromial impingement	ROM - Shoulder	ROM- int rotation	Exercise only	Resistance	Resistance	Concentric and eccentric	Concentric and eccentric, isometric	30	49	9	70	28.9	4.65	Supervised	Clinic	Low risk	Low risk	High risk	Low risk	Low risk	Low risk	High risk	8	Short	1358	653	0.601180891	0.164796354
2	37. Hotta et al 2020	RCT	Rotator cuff - subacromial impingement	ROM - Shoulder	ROM- int rotation	Exercise only	Resistance	Resistance	Concentric and eccentric	Concentric and eccentric, isometric	30	49	9	70	28.9	4.65	Supervised	Clinic	Low risk	Low risk	High risk	Low risk	Low risk	Low risk	High risk	16	Medium	1358	654	0.474932904	0.156870305
2	37. Hotta et al 2020	RCT	Rotator cuff - subacromial impingement	Physical function capacity	Dynamometer- abduction	Exercise only	Resistance	Resistance	Concentric and eccentric	Concentric and eccentric, isometric	30	49	9	70	28.9	4.65	Supervised	Clinic	Low risk	Low risk	High risk	Low risk	Low risk	Low risk	High risk	4	Short	1359	655	0.273913043	0.147591791
2	37. Hotta et al 2020	RCT	Rotator cuff - subacromial impingement	Physical function capacity	Dynamometer- abduction	Exercise only	Resistance	Resistance	Concentric and eccentric	Concentric and eccentric, isometric	30	49	9	70	28.9	4.65	Supervised	Clinic	Low risk	Low risk	High risk	Low risk	Low risk	Low risk	High risk	8	Short	1359	656	0.517391304	0.159370532
2	37. Hotta et al 2020	RCT	Rotator cuff - subacromial impingement	Physical function capacity	Dynamometer- abduction	Exercise only	Resistance	Resistance	Concentric and eccentric	Concentric and eccentric, isometric	30	49	9	70	28.9	4.65	Supervised	Clinic	Low risk	Low risk	High risk	Low risk	Low risk	Low risk	High risk	16	Medium	1359	657	0.486956522	0.157560569
2	37. Hotta et al 2020	RCT	Rotator cuff - subacromial impingement	Physical function capacity	Dynamometer- ext rotation	Exercise only	Resistance	Resistance	Concentric and eccentric	Concentric and eccentric, isometric	30	49	9	70	28.9	4.65	Supervised	Clinic	Low risk	Low risk	High risk	Low risk	Low risk	Low risk	High risk	4	Short	1360	658	0.154940711	0.144311623
2	37. Hotta et al 2020	RCT	Rotator cuff - subacromial impingement	Physical function capacity	Dynamometer- ext rotation	Exercise only	Resistance	Resistance	Concentric and eccentric	Concentric and eccentric, isometric	30	49	9	70	28.9	4.65	Supervised	Clinic	Low risk	Low risk	High risk	Low risk	Low risk	Low risk	High risk	8	Short	1360	659	0.354150198	0.150761564
2	37. Hotta et al 2020	RCT	Rotator cuff - subacromial impingement	Physical function capacity	Dynamometer- ext rotation	Exercise only	Resistance	Resistance	Concentric and eccentric	Concentric and eccentric, isometric	30	49	9	70	28.9	4.65	Supervised	Clinic	Low risk	Low risk	High risk	Low risk	Low risk	Low risk	High risk	16	Medium	1360	660	0.464822134	0.156300931
2	37. Hotta et al 2020	RCT	Rotator cuff - subacromial impingement	Physical function capacity	Dynamometer- int rotation	Exercise only	Resistance	Resistance	Concentric and eccentric	Concentric and eccentric, isometric	30	49	9	70	28.9	4.65	Supervised	Clinic	Low risk	Low risk	High risk	Low risk	Low risk	Low risk	High risk	4	Short	1361	661	0.208695652	0.145577042
2	37. Hotta et al 2020	RCT	Rotator cuff - subacromial impingement	Physical function capacity	Dynamometer- int rotation	Exercise only	Resistance	Resistance	Concentric and eccentric	Concentric and eccentric, isometric	30	49	9	70	28.9	4.65	Supervised	Clinic	Low risk	Low risk	High risk	Low risk	Low risk	Low risk	High risk	8	Short	1361	662	0.347826087	0.15048501
2	37. Hotta et al 2020	RCT	Rotator cuff - subacromial impingement	Physical function capacity	Dynamometer- int rotation	Exercise only	Resistance	Resistance	Concentric and eccentric	Concentric and eccentric, isometric	30	49	9	70	28.9	4.65	Supervised	Clinic	Low risk	Low risk	High risk	Low risk	Low risk	Low risk	High risk	16	Medium	1361	663	0.463768116	0.156242163
2	37. Hotta et al 2020	RCT	Rotator cuff - subacromial impingement	Physical function capacity	Dynamometer- serratus anterior	Exercise only	Resistance	Resistance	Concentric and eccentric	Concentric and eccentric, isometric	30	49	9	70	28.9	4.65	Supervised	Clinic	Low risk	Low risk	High risk	Low risk	Low risk	Low risk	High risk	4	Short	1362	664	0.44057971	0.154977662
2	37. Hotta et al 2020	RCT	Rotator cuff - subacromial impingement	Physical function capacity	Dynamometer- serratus anterior	Exercise only	Resistance	Resistance	Concentric and eccentric	Concentric and eccentric, isometric	30	49	9	70	28.9	4.65	Supervised	Clinic	Low risk	Low risk	High risk	Low risk	Low risk	Low risk	High risk	8	Short	1362	665	0.71884058	0.173414258
2	37. Hotta et al 2020	RCT	Rotator cuff - subacromial impingement	Physical function capacity	Dynamometer- serratus anterior	Exercise only	Resistance	Resistance	Concentric and eccentric	Concentric and eccentric, isometric	30	49	9	70	28.9	4.65	Supervised	Clinic	Low risk	Low risk	High risk	Low risk	Low risk	Low risk	High risk	16	Medium	1362	666	0.904347826	0.189006099
2	37. Hotta et al 2020	RCT	Rotator cuff - subacromial impingement	Physical function capacity	Dynamometer- upper trapezius	Exercise only	Resistance	Resistance	Concentric and eccentric	Concentric and eccentric, isometric	30	49	9	70	28.9	4.65	Supervised	Clinic	Low risk	Low risk	High risk	Low risk	Low risk	Low risk	High risk	4	Short	1363	667	0.429667519	0.154401634
2	37. Hotta et al 2020	RCT	Rotator cuff - subacromial impingement	Physical function capacity	Dynamometer- upper trapezius	Exercise only	Resistance	Resistance	Concentric and eccentric	Concentric and eccentric, isometric	30	49	9	70	28.9	4.65	Supervised	Clinic	Low risk	Low risk	High risk	Low risk	Low risk	Low risk	High risk	8	Short	1363	668	0.802046036	0.180131381
2	37. Hotta et al 2020	RCT	Rotator cuff - subacromial impingement	Physical function capacity	Dynamometer- upper trapezius	Exercise only	Resistance	Resistance	Concentric and eccentric	Concentric and eccentric, isometric	30	49	9	70	28.9	4.65	Supervised	Clinic	Low risk	Low risk	High risk	Low risk	Low risk	Low risk	High risk	16	Medium	1363	669	0.773401535	0.177765091
2	37. Hotta et al 2020	RCT	Rotator cuff - subacromial impingement	Physical function capacity	Dynamometer- mid trapezius	Exercise only	Resistance	Resistance	Concentric and eccentric	Concentric and eccentric, isometric	30	49	9	70	28.9	4.65	Supervised	Clinic	Low risk	Low risk	High risk	Low risk	Low risk	Low risk	High risk	4	Short	1364	670	0.18729097	0.145029694
2	37. Hotta et al 2020	RCT	Rotator cuff - subacromial impingement	Physical function capacity	Dynamometer- mid trapezius	Exercise only	Resistance	Resistance	Concentric and eccentric	Concentric and eccentric, isometric	30	49	9	70	28.9	4.65	Supervised	Clinic	Low risk	Low risk	High risk	Low risk	Low risk	Low risk	High risk	8	Short	1364	671	0.262207358	0.147192274
2	37. Hotta et al 2020	RCT	Rotator cuff - subacromial impingement	Physical function capacity	Dynamometer- mid trapezius	Exercise only	Resistance	Resistance	Concentric and eccentric	Concentric and eccentric, isometric	30	49	9	70	28.9	4.65	Supervised	Clinic	Low risk	Low risk	High risk	Low risk	Low risk	Low risk	High risk	16	Medium	1364	672	0.37458194	0.15168542
2	37. Hotta et al 2020	RCT	Rotator cuff - subacromial impingement	Physical function capacity	Dynamometer- lower trapezius	Exercise only	Resistance	Resistance	Concentric and eccentric	Concentric and eccentric, isometric	30	49	9	70	28.9	4.65	Supervised	Clinic	Low risk	Low risk	High risk	Low risk	Low risk	Low risk	High risk	4	Short	1365	673	0.112374582	0.143569878
2	37. Hotta et al 2020	RCT	Rotator cuff - subacromial impingement	Physical function capacity	Dynamometer- lower trapezius	Exercise only	Resistance	Resistance	Concentric and eccentric	Concentric and eccentric, isometric	30	49	9	70	28.9	4.65	Supervised	Clinic	Low risk	Low risk	High risk	Low risk	Low risk	Low risk	High risk	8	Short	1365	674	0.262207358	0.147192274
2	37. Hotta et al 2020	RCT	Rotator cuff - subacromial impingement	Physical function capacity	Dynamometer- lower trapezius	Exercise only	Resistance	Resistance	Concentric and eccentric	Concentric and eccentric, isometric	30	49	9	70	28.9	4.65	Supervised	Clinic	Low risk	Low risk	High risk	Low risk	Low risk	Low risk	High risk	16	Medium	1365	675	0.262207358	0.147192274
2	18. Chaconas et al 2017	RCT	Rotator cuff - subacromial impingement	Disability	WORC	Multiple exercise types	Resistance	Flexibility, Resistance	Eccentric only	Eccentric only, Concentric only, Static	21	45.85	17.385	41.66666667	80.885	16.795	Unsupervised	NA	Low risk	Unclear	Unclear	Low risk	High risk	Unclear	High risk	3	Short	1366	676	-0.084040564	0.17199063
2	18. Chaconas et al 2017	RCT	Rotator cuff - subacromial impingement	Disability	WORC	Multiple exercise types	Resistance	Flexibility, Resistance	Eccentric only	Eccentric only, Concentric only, Static	21	45.85	17.385	41.66666667	80.885	16.795	Unsupervised	NA	Low risk	Unclear	Unclear	Low risk	High risk	Unclear	High risk	6	Short	1366	677	0.352560414	0.181387747
2	18. Chaconas et al 2017	RCT	Rotator cuff - subacromial impingement	Disability	WORC	Multiple exercise types	Resistance	Flexibility, Resistance	Eccentric only	Eccentric only, Concentric only, Static	14	45.85	17.385	41.66666667	80.885	16.795	Unsupervised	NA	Low risk	Unclear	Unclear	Low risk	High risk	Unclear	High risk	26.07145714	Medium	1366	678	0.785427807	0.271624498
2	18. Chaconas et al 2017	RCT	Rotator cuff - subacromial impingement	Pain	NPRS- best pain	Multiple exercise types	Resistance	Flexibility, Resistance	Eccentric only	Eccentric only, Concentric only, Static	21	45.85	17.385	41.66666667	80.885	16.795	Unsupervised	NA	Low risk	Unclear	Unclear	Low risk	High risk	Unclear	High risk	3	Short	1367	679	-0.157832278	0.17345412
2	18. Chaconas et al 2017	RCT	Rotator cuff - subacromial impingement	Pain	NPRS- best pain	Multiple exercise types	Resistance	Flexibility, Resistance	Eccentric only	Eccentric only, Concentric only, Static	21	45.85	17.385	41.66666667	80.885	16.795	Unsupervised	NA	Low risk	Unclear	Unclear	Low risk	High risk	Unclear	High risk	6	Short	1367	680	0.067642405	0.171785689
2	18. Chaconas et al 2017	RCT	Rotator cuff - subacromial impingement	Pain	NPRS- best pain	Multiple exercise types	Resistance	Flexibility, Resistance	Eccentric only	Eccentric only, Concentric only, Static	14	45.85	17.385	41.66666667	80.885	16.795	Unsupervised	NA	Low risk	Unclear	Unclear	Low risk	High risk	Unclear	High risk	26.07145714	Medium	1367	681	0.161764706	0.214691287
2	18. Chaconas et al 2017	RCT	Rotator cuff - subacromial impingement	Pain	NPRS- worst pain	Multiple exercise types	Resistance	Flexibility, Resistance	Eccentric only	Eccentric only, Concentric only, Static	21	45.85	17.385	41.66666667	80.885	16.795	Unsupervised	NA	Low risk	Unclear	Unclear	Low risk	High risk	Unclear	High risk	3	Short	1368	682	0.161104718	0.173539317
2	18. Chaconas et al 2017	RCT	Rotator cuff - subacromial impingement	Pain	NPRS- worst pain	Multiple exercise types	Resistance	Flexibility, Resistance	Eccentric only	Eccentric only, Concentric only, Static	21	45.85	17.385	41.66666667	80.885	16.795	Unsupervised	NA	Low risk	Unclear	Unclear	Low risk	High risk	Unclear	High risk	6	Short	1368	683	0.280782509	0.177802837
2	18. Chaconas et al 2017	RCT	Rotator cuff - subacromial impingement	Pain	NPRS- worst pain	Multiple exercise types	Resistance	Flexibility, Resistance	Eccentric only	Eccentric only, Concentric only, Static	14	45.85	17.385	41.66666667	80.885	16.795	Unsupervised	NA	Low risk	Unclear	Unclear	Low risk	High risk	Unclear	High risk	26.07145714	Medium	1368	684	0.80607937	0.274445536
2	18. Chaconas et al 2017	RCT	Rotator cuff - subacromial impingement	Physical function capacity	Dynamometer- ext rotation	Multiple exercise types	Resistance	Flexibility, Resistance	Eccentric only	Eccentric only, Concentric only, Static	21	45.85	17.385	41.66666667	80.885	16.795	Unsupervised	NA	Low risk	Unclear	Unclear	Low risk	High risk	Unclear	High risk	3	Short	1369	685	-0.265386294	0.17713177
2	18. Chaconas et al 2017	RCT	Rotator cuff - subacromial impingement	Physical function capacity	Dynamometer- ext rotation	Multiple exercise types	Resistance	Flexibility, Resistance	Eccentric only	Eccentric only, Concentric only, Static	21	45.85	17.385	41.66666667	80.885	16.795	Unsupervised	NA	Low risk	Unclear	Unclear	Low risk	High risk	Unclear	High risk	6	Short	1369	686	-0.364906155	0.182078032
2	18. Chaconas et al 2017	RCT	Rotator cuff - subacromial impingement	Physical function capacity	Dynamometer- ext rotation	Multiple exercise types	Resistance	Flexibility, Resistance	Eccentric only	Eccentric only, Concentric only, Static	14	45.85	17.385	41.66666667	80.885	16.795	Unsupervised	NA	Low risk	Unclear	Unclear	Low risk	High risk	Unclear	High risk	26.07145714	Medium	1369	687	-0.227180527	0.21745085
2	18. Chaconas et al 2017	RCT	Rotator cuff - subacromial impingement	Physical function capacity	Dynamometer- int rotation	Multiple exercise types	Resistance	Flexibility, Resistance	Eccentric only	Eccentric only, Concentric only, Static	21	45.85	17.385	41.66666667	80.885	16.795	Unsupervised	NA	Low risk	Unclear	Unclear	Low risk	High risk	Unclear	High risk	3	Short	1370	688	-0.133614627	0.172876857
2	18. Chaconas et al 2017	RCT	Rotator cuff - subacromial impingement	Physical function capacity	Dynamometer- int rotation	Multiple exercise types	Resistance	Flexibility, Resistance	Eccentric only	Eccentric only, Concentric only, Static	21	45.85	17.385	41.66666667	80.885	16.795	Unsupervised	NA	Low risk	Unclear	Unclear	Low risk	High risk	Unclear	High risk	6	Short	1370	689	-0.240506329	0.17612253
2	18. Chaconas et al 2017	RCT	Rotator cuff - subacromial impingement	Physical function capacity	Dynamometer- int rotation	Multiple exercise types	Resistance	Flexibility, Resistance	Eccentric only	Eccentric only, Concentric only, Static	14	45.85	17.385	41.66666667	80.885	16.795	Unsupervised	NA	Low risk	Unclear	Unclear	Low risk	High risk	Unclear	High risk	26.07145714	Medium	1370	690	0.052287582	0.212117899
2	18. Chaconas et al 2017	RCT	Rotator cuff - subacromial impingement	Physical function capacity	Dynamometer- abduction	Multiple exercise types	Resistance	Flexibility, Resistance	Eccentric only	Eccentric only, Concentric only, Static	21	45.85	17.385	41.66666667	80.885	16.795	Unsupervised	NA	Low risk	Unclear	Unclear	Low risk	High risk	Unclear	High risk	3	Short	1371	691	-0.105221519	0.172320416
2	18. Chaconas et al 2017	RCT	Rotator cuff - subacromial impingement	Physical function capacity	Dynamometer- abduction	Multiple exercise types	Resistance	Flexibility, Resistance	Eccentric only	Eccentric only, Concentric only, Static	21	45.85	17.385	41.66666667	80.885	16.795	Unsupervised	NA	Low risk	Unclear	Unclear	Low risk	High risk	Unclear	High risk	6	Short	1371	692	-0.120253165	0.172598746
2	18. Chaconas et al 2017	RCT	Rotator cuff - subacromial impingement	Physical function capacity	Dynamometer- abduction	Multiple exercise types	Resistance	Flexibility, Resistance	Eccentric only	Eccentric only, Concentric only, Static	14	45.85	17.385	41.66666667	80.885	16.795	Unsupervised	NA	Low risk	Unclear	Unclear	Low risk	High risk	Unclear	High risk	26.07145714	Medium	1371	693	-0.058823529	0.212198117
2	18. Chaconas et al 2017	RCT	Rotator cuff - subacromial impingement	ROM - Shoulder	ROM- flexion	Multiple exercise types	Resistance	Flexibility, Resistance	Eccentric only	Eccentric only, Concentric only, Static	21	45.85	17.385	41.66666667	80.885	16.795	Unsupervised	NA	Low risk	Unclear	Unclear	Low risk	High risk	Unclear	High risk	3	Short	1372	694	0.093099224	0.172122715
2	18. Chaconas et al 2017	RCT	Rotator cuff - subacromial impingement	ROM - Shoulder	ROM- flexion	Multiple exercise types	Resistance	Flexibility, Resistance	Eccentric only	Eccentric only, Concentric only, Static	21	45.85	17.385	41.66666667	80.885	16.795	Unsupervised	NA	Low risk	Unclear	Unclear	Low risk	High risk	Unclear	High risk	6	Short	1372	695	0.434463046	0.186352728
2	18. Chaconas et al 2017	RCT	Rotator cuff - subacromial impingement	ROM - Shoulder	ROM- flexion	Multiple exercise types	Resistance	Flexibility, Resistance	Eccentric only	Eccentric only, Concentric only, Static	14	45.85	17.385	41.66666667	80.885	16.795	Unsupervised	NA	Low risk	Unclear	Unclear	Low risk	High risk	Unclear	High risk	26.07145714	Medium	1372	696	0.667931689	0.256468595
2	18. Chaconas et al 2017	RCT	Rotator cuff - subacromial impingement	ROM - Shoulder	ROM- abduction	Multiple exercise types	Resistance	Flexibility, Resistance	Eccentric only	Eccentric only, Concentric only, Static	21	45.85	17.385	41.66666667	80.885	16.795	Unsupervised	NA	Low risk	Unclear	Unclear	Low risk	High risk	Unclear	High risk	3	Short	1373	697	0.027486438	0.171470466
2	18. Chaconas et al 2017	RCT	Rotator cuff - subacromial impingement	ROM - Shoulder	ROM- abduction	Multiple exercise types	Resistance	Flexibility, Resistance	Eccentric only	Eccentric only, Concentric only, Static	21	45.85	17.385	41.66666667	80.885	16.795	Unsupervised	NA	Low risk	Unclear	Unclear	Low risk	High risk	Unclear	High risk	6	Short	1373	698	0.247377939	0.176391914
2	18. Chaconas et al 2017	RCT	Rotator cuff - subacromial impingement	ROM - Shoulder	ROM- abduction	Multiple exercise types	Resistance	Flexibility, Resistance	Eccentric only	Eccentric only, Concentric only, Static	14	45.85	17.385	41.66666667	80.885	16.795	Unsupervised	NA	Low risk	Unclear	Unclear	Low risk	High risk	Unclear	High risk	26.07145714	Medium	1373	699	0.484033613	0.236319666
2	18. Chaconas et al 2017	RCT	Rotator cuff - subacromial impingement	ROM - Shoulder	ROM- ext rotation	Multiple exercise types	Resistance	Flexibility, Resistance	Eccentric only	Eccentric only, Concentric only, Static	21	45.85	17.385	41.66666667	80.885	16.795	Unsupervised	NA	Low risk	Unclear	Unclear	Low risk	High risk	Unclear	High risk	3	Short	1374	700	-0.113179449	0.1724632
2	18. Chaconas et al 2017	RCT	Rotator cuff - subacromial impingement	ROM - Shoulder	ROM- ext rotation	Multiple exercise types	Resistance	Flexibility, Resistance	Eccentric only	Eccentric only, Concentric only, Static	21	45.85	17.385	41.66666667	80.885	16.795	Unsupervised	NA	Low risk	Unclear	Unclear	Low risk	High risk	Unclear	High risk	6	Short	1374	701	-0.056589724	0.171672449
2	18. Chaconas et al 2017	RCT	Rotator cuff - subacromial impingement	ROM - Shoulder	ROM- ext rotation	Multiple exercise types	Resistance	Flexibility, Resistance	Eccentric only	Eccentric only, Concentric only, Static	14	45.85	17.385	41.66666667	80.885	16.795	Unsupervised	NA	Low risk	Unclear	Unclear	Low risk	High risk	Unclear	High risk	26.07145714	Medium	1374	702	0.166089965	0.214846022
2	18. Chaconas et al 2017	RCT	Rotator cuff - subacromial impingement	ROM - Shoulder	ROM- int rotation	Multiple exercise types	Resistance	Flexibility, Resistance	Eccentric only	Eccentric only, Concentric only, Static	21	45.85	17.385	41.66666667	80.885	16.795	Unsupervised	NA	Low risk	Unclear	Unclear	Low risk	High risk	Unclear	High risk	3	Short	1375	703	-0.060126582	0.171706501
2	18. Chaconas et al 2017	RCT	Rotator cuff - subacromial impingement	ROM - Shoulder	ROM- int rotation	Multiple exercise types	Resistance	Flexibility, Resistance	Eccentric only	Eccentric only, Concentric only, Static	21	45.85	17.385	41.66666667	80.885	16.795	Unsupervised	NA	Low risk	Unclear	Unclear	Low risk	High risk	Unclear	High risk	6	Short	1375	704	-0.120253165	0.172598746
2	18. Chaconas et al 2017	RCT	Rotator cuff - subacromial impingement	ROM - Shoulder	ROM- int rotation	Multiple exercise types	Resistance	Flexibility, Resistance	Eccentric only	Eccentric only, Concentric only, Static	14	45.85	17.385	41.66666667	80.885	16.795	Unsupervised	NA	Low risk	Unclear	Unclear	Low risk	High risk	Unclear	High risk	26.07145714	Medium	1375	705	0.235294118	0.21785487
2	21. De Jonge et al 2008	RCT	Achilles	Disability	VISA-A	Exercise only	Resistance	Resistance	Eccentric only	Eccentric only	34	44.6	26-59	NA	25.1	20.2-34.5	Unsupervised	NA	Unclear	Low risk	Low risk	Low risk	Low risk	Low risk	Low risk	13.03572857	Medium	1376	706	1.209750414	0.204490272
2	21. De Jonge et al 2008	RCT	Achilles	Disability	VISA-A	Exercise only	Resistance	Resistance	Eccentric only	Eccentric only	34	44.6	26-59	NA	25.1	20.2-34.5	Unsupervised	NA	Unclear	Low risk	Low risk	Low risk	Low risk	Low risk	Low risk	52.14291429	Medium	1376	707	1.65612891	0.250382265
2	109. Werner et al 2002	RCT	Rotator cuff - subacromial impingement	Disability	Constant-Murley score	Multiple exercise types	Resistance	Flexibility, Resistance	Isometric	Isometric, static	10	NA	NA	NA	NA	NA	NA	NA	Low risk	Unclear	Unclear	Unclear	Unclear	Unclear	High risk	6	Short	1377	708	0.478751575	0.285689625
2	109. Werner et al 2002	RCT	Rotator cuff - subacromial impingement	Disability	Constant-Murley score	Multiple exercise types	Resistance	Flexibility, Resistance	Isometric	Isometric, static	10	NA	NA	NA	NA	NA	NA	NA	Low risk	Unclear	Unclear	Unclear	Unclear	Unclear	High risk	12	Short	1377	709	0.851113912	0.344434657
2	19. Cheng et al 2007	RCT	Rotator cuff - subacromial impingement	ROM - Shoulder	ROM- flexion	Multiple exercise types	Resistance	Flexibility, Proprioception, Resistance	Concentric and eccentric	concentric and eccentric, isometric, movement patter retraining, static	48	32.37	10.18	23.4	NA	NA	NA	NA	High risk	High risk	Unclear	Unclear	Unclear	Unclear	High risk	4	Short	1378	710	0.574423113	0.127812928
6	9. Balius et al 2016	RCT	Achilles	Disability	VISA-A	Exercise only	Flexibility	Flexibility	PNF	PNF	9	41.38	11.66	20.38	NA	NA	Supervised	Clinic	Low risk	Low risk	Unclear	Low risk	Low risk	Unclear	Low risk	6	Short	2000	711	1.806451613	0.599072392
6	9. Balius et al 2016	RCT	Achilles	Disability	VISA-A	Exercise only	Flexibility	Flexibility	PNF	PNF	9	41.38	11.66	20.38	NA	NA	Supervised	Clinic	Low risk	Low risk	Unclear	Low risk	Low risk	Unclear	Low risk	12	Short	2000	712	2.8	0.872079471
6	9. Balius et al 2016	RCT	Achilles	Pain	VAS- rest	Exercise only	Flexibility	Flexibility	PNF	PNF	9	41.38	11.66	20.38	NA	NA	Supervised	Clinic	Low risk	Low risk	Unclear	Low risk	Low risk	Unclear	Low risk	6	Short	2001	713	0.64516129	0.330217998
6	9. Balius et al 2016	RCT	Achilles	Pain	VAS- rest	Exercise only	Flexibility	Flexibility	PNF	PNF	9	41.38	11.66	20.38	NA	NA	Supervised	Clinic	Low risk	Low risk	Unclear	Low risk	Low risk	Unclear	Low risk	12	Short	2001	714	2.193548387	0.703397252
6	9. Balius et al 2016	RCT	Achilles	Pain	VAS- movement	Exercise only	Flexibility	Flexibility	PNF	PNF	9	41.38	11.66	20.38	NA	NA	Supervised	Clinic	Low risk	Low risk	Unclear	Low risk	Low risk	Unclear	Low risk	6	Short	2002	715	1.462365591	0.510082351
6	9. Balius et al 2016	RCT	Achilles	Pain	VAS- movement	Exercise only	Flexibility	Flexibility	PNF	PNF	9	41.38	11.66	20.38	NA	NA	Supervised	Clinic	Low risk	Low risk	Unclear	Low risk	Low risk	Unclear	Low risk	12	Short	2002	716	2.064516129	0.668245631
4	99. Tonks et al 2007	RCT	Lateral elbow/tennis elbow	Disability	Patient related forearm evaluation questionnaire (PRFEQ)- pain	Multiple exercise types	Resistance	Flexibility, Resistance	Isometric	Concentric and eccentric, isometric, static	8	44.325	7.125	NA	NA	NA	Unsupervised	Home	Low risk	Low risk	Low risk	High risk	High risk	Low risk	Low risk	7	Short	2005	717	2.617283951	0.900147501
4	99. Tonks et al 2007	RCT	Lateral elbow/tennis elbow	Disability	Patient related forearm evaluation questionnaire (PRFEQ)- function	Multiple exercise types	Resistance	Flexibility, Resistance	Isometric	Concentric and eccentric, isometric, static	8	44.325	7.125	NA	NA	NA	Unsupervised	Home	Low risk	Low risk	Low risk	High risk	High risk	Low risk	Low risk	7	Short	2006	718	1.822222222	0.659931225
4	99. Tonks et al 2007	RCT	Lateral elbow/tennis elbow	Disability	Patient related forearm evaluation questionnaire (PRFEQ)- total	Multiple exercise types	Resistance	Flexibility, Resistance	Isometric	Concentric and eccentric, isometric, static	8	44.325	7.125	NA	NA	NA	Unsupervised	Home	Low risk	Low risk	Low risk	High risk	High risk	Low risk	Low risk	7	Short	2007	719	3.636363636	1.219385639
3	54. Luginbuhl et al 2008	RCT	Lateral elbow/tennis elbow	Disability	modified Nirsch score	Exercise only	Resistance	Resistance	Isometric	Isometric	10	47	9	72.7	NA	NA	Unsupervised	Home	Unclear	Unclear	Unclear	Unclear	Unclear	Unclear	High risk	52	Medium	2013	720	2.220408163	0.65804961
3	54. Luginbuhl et al 2008	RCT	Lateral elbow/tennis elbow	Physical function capacity	Grip strength	Exercise only	Resistance	Resistance	Isometric	Isometric	10	47	9	72.7	NA	NA	Unsupervised	Home	Unclear	Unclear	Unclear	Unclear	Unclear	Unclear	High risk	52	Medium	2014	721	1.163636364	0.4070667
3	20. Cho et al 2017	Quasi-experimental	Patellar	Pain	VAS- pain	Multiple exercise types	Resistance	Flexibility, Proprioception, Resistance	Eccentric only	Eccentric only, Balance, Static, Concentric and eccentric	10	33.1	29.1456591	46.66666667	22.27	7.178370289	NA	NA	High risk	High risk	Unclear	Unclear	Low risk	Low risk	Unclear	6	Short	2015	722	2.481632653	0.724462918
3	20. Cho et al 2017	Quasi-experimental	Patellar	Pain	VAS- pain	Multiple exercise types	Resistance	Flexibility, Proprioception, Resistance	Eccentric only	Eccentric only, Balance, Static, Concentric and eccentric	10	33.1	29.1456591	46.66666667	22.27	7.178370289	NA	NA	High risk	High risk	Unclear	Unclear	Low risk	Low risk	Unclear	12	Short	2015	723	4.310204082	1.205496052
3	20. Cho et al 2017	Quasi-experimental	Patellar	Disability	VISA-P	Multiple exercise types	Resistance	Flexibility, Proprioception, Resistance	Eccentric only	Eccentric only, Balance, Static, Concentric and eccentric	10	33.1	29.1456591	46.66666667	22.27	7.178370289	NA	NA	High risk	High risk	Unclear	Unclear	Low risk	Low risk	Unclear	6	Short	2016	724	0.915612689	0.356585715
3	20. Cho et al 2017	Quasi-experimental	Patellar	Disability	VISA-P	Multiple exercise types	Resistance	Flexibility, Proprioception, Resistance	Eccentric only	Eccentric only, Balance, Static, Concentric and eccentric	10	33.1	29.1456591	46.66666667	22.27	7.178370289	NA	NA	High risk	High risk	Unclear	Unclear	Low risk	Low risk	Unclear	12	Short	2016	725	1.20754717	0.416517154
3	20. Cho et al 2017	Quasi-experimental	Patellar	Physical function capacity	Dynamometer- extension	Multiple exercise types	Resistance	Flexibility, Proprioception, Resistance	Eccentric only	Eccentric only, Balance, Static, Concentric and eccentric	10	33.1	29.1456591	46.66666667	22.27	7.178370289	NA	NA	High risk	High risk	Unclear	Unclear	Low risk	Low risk	Unclear	12	Short	2017	726	0.170991799	0.258206797
3	20. Cho et al 2017	Quasi-experimental	Patellar	Physical function capacity	Dynamometer- extension	Multiple exercise types	Resistance	Flexibility, Proprioception, Resistance	Eccentric only	Eccentric only, Balance, Static, Concentric and eccentric	10	33.1	29.1456591	46.66666667	22.27	7.178370289	NA	NA	High risk	High risk	Unclear	Unclear	Low risk	Low risk	Unclear	12	Short	2017	727	0.420045071	0.278701
3	20. Cho et al 2017	Quasi-experimental	Patellar	Physical function capacity	Dynamometer- flexion	Multiple exercise types	Resistance	Flexibility, Proprioception, Resistance	Eccentric only	Eccentric only, Balance, Static, Concentric and eccentric	10	33.1	29.1456591	46.66666667	22.27	7.178370289	NA	NA	High risk	High risk	Unclear	Unclear	Low risk	Low risk	Unclear	12	Short	2018	728	0.399947815	0.276482116
3	20. Cho et al 2017	Quasi-experimental	Patellar	Physical function capacity	Dynamometer- flexion	Multiple exercise types	Resistance	Flexibility, Proprioception, Resistance	Eccentric only	Eccentric only, Balance, Static, Concentric and eccentric	10	33.1	29.1456591	46.66666667	22.27	7.178370289	NA	NA	High risk	High risk	Unclear	Unclear	Low risk	Low risk	Unclear	12	Short	2018	729	0.437799522	0.280736112
3	20. Cho et al 2017	Quasi-experimental	Patellar	Physical function capacity	One leg hop	Multiple exercise types	Resistance	Flexibility, Proprioception, Resistance	Eccentric only	Eccentric only, Balance, Static, Concentric and eccentric	10	33.1	29.1456591	46.66666667	22.27	7.178370289	NA	NA	High risk	High risk	Unclear	Unclear	Low risk	Low risk	Unclear	12	Short	2019	730	0.304501647	0.267238185
3	20. Cho et al 2017	Quasi-experimental	Patellar	Physical function capacity	One leg hop	Multiple exercise types	Resistance	Flexibility, Proprioception, Resistance	Eccentric only	Eccentric only, Balance, Static, Concentric and eccentric	10	33.1	29.1456591	46.66666667	22.27	7.178370289	NA	NA	High risk	High risk	Unclear	Unclear	Low risk	Low risk	Unclear	12	Short	2019	731	0.478874385	0.285705011
3	20. Cho et al 2017	Quasi-experimental	Patellar	Pain	VAS- pain 25 deg board squat	Multiple exercise types	Resistance	Flexibility, Proprioception, Resistance	Eccentric only	Eccentric only, Balance, Static, Concentric and eccentric	10	33.1	29.1456591	46.66666667	22.27	7.178370289	NA	NA	High risk	High risk	Unclear	Unclear	Low risk	Low risk	Unclear	12	Short	2020	732	0.034115139	0.25411047
3	20. Cho et al 2017	Quasi-experimental	Patellar	Pain	VAS- pain 25 deg board squat	Multiple exercise types	Resistance	Flexibility, Proprioception, Resistance	Eccentric only	Eccentric only, Balance, Static, Concentric and eccentric	10	33.1	29.1456591	46.66666667	22.27	7.178370289	NA	NA	High risk	High risk	Unclear	Unclear	Low risk	Low risk	Unclear	12	Short	2020	733	0.784648188	0.332427462
3	91. Stasinopoulos et al 2006	Quasi-experimental	Lateral elbow/tennis elbow	Pain	VAS- 24hr	Multiple exercise types	Resistance	Flexibility, Resistance	Eccentric only	Eccentric Only, Static	25	40.3	5.8	38.6	NA	NA	Supervised	Clinic	Not applicable (quasi)	Not applicable (quasi)	Unclear	Low risk	Low risk	Unclear	High risk	4	Short	2021	734	5.097769237	0.790438957
3	91. Stasinopoulos et al 2006	Quasi-experimental	Lateral elbow/tennis elbow	Pain	VAS- 24hr	Multiple exercise types	Resistance	Flexibility, Resistance	Eccentric only	Eccentric Only, Static	25	40.3	5.8	38.6	NA	NA	Supervised	Clinic	Not applicable (quasi)	Not applicable (quasi)	Unclear	Low risk	Low risk	Unclear	High risk	8	Short	2021	735	5.640085113	0.871376709
3	91. Stasinopoulos et al 2006	Quasi-experimental	Lateral elbow/tennis elbow	Pain	VAS- 24hr	Multiple exercise types	Resistance	Flexibility, Resistance	Eccentric only	Eccentric Only, Static	25	40.3	5.8	38.6	NA	NA	Supervised	Clinic	Not applicable (quasi)	Not applicable (quasi)	Unclear	Low risk	Low risk	Unclear	High risk	16	Medium	2021	736	6.290864164	0.968832046
3	91. Stasinopoulos et al 2006	Quasi-experimental	Lateral elbow/tennis elbow	Pain	VAS- 24hr	Multiple exercise types	Resistance	Flexibility, Resistance	Eccentric only	Eccentric Only, Static	25	40.3	5.8	38.6	NA	NA	Supervised	Clinic	Not applicable (quasi)	Not applicable (quasi)	Unclear	Low risk	Low risk	Unclear	High risk	28	Medium	2021	737	6.507790515	1.001380305
3	91. Stasinopoulos et al 2006	Quasi-experimental	Lateral elbow/tennis elbow	Function	VAS- function over 24hr (0-10 full function)	Multiple exercise types	Resistance	Flexibility, Resistance	Eccentric only	Eccentric Only, Static	25	40.3	5.8	38.6	NA	NA	Supervised	Clinic	Not applicable (quasi)	Not applicable (quasi)	Unclear	Low risk	Low risk	Unclear	High risk	4	Short	2022	738	4.935074474	0.766219271
3	91. Stasinopoulos et al 2006	Quasi-experimental	Lateral elbow/tennis elbow	Function	VAS- function over 24hr (0-10 full function)	Multiple exercise types	Resistance	Flexibility, Resistance	Eccentric only	Eccentric Only, Static	25	40.3	5.8	38.6	NA	NA	Supervised	Clinic	Not applicable (quasi)	Not applicable (quasi)	Unclear	Low risk	Low risk	Unclear	High risk	8	Short	2022	739	5.441235958	0.841666122
3	91. Stasinopoulos et al 2006	Quasi-experimental	Lateral elbow/tennis elbow	Function	VAS- function over 24hr (0-10 full function)	Multiple exercise types	Resistance	Flexibility, Resistance	Eccentric only	Eccentric Only, Static	25	40.3	5.8	38.6	NA	NA	Supervised	Clinic	Not applicable (quasi)	Not applicable (quasi)	Unclear	Low risk	Low risk	Unclear	High risk	16	Medium	2022	740	5.567776329	0.860568748
3	91. Stasinopoulos et al 2006	Quasi-experimental	Lateral elbow/tennis elbow	Function	VAS- function over 24hr (0-10 full function)	Multiple exercise types	Resistance	Flexibility, Resistance	Eccentric only	Eccentric Only, Static	25	40.3	5.8	38.6	NA	NA	Supervised	Clinic	Not applicable (quasi)	Not applicable (quasi)	Unclear	Low risk	Low risk	Unclear	High risk	28	Medium	2022	741	5.694316701	0.87948563
3	49. Kongsgaard et al 2009	RCT	Patellar	Disability	VISA-P	Exercise only	Resistance	Resistance	Eccentric only	Eccentric only	12	32.4	8.8	0	24.7	2.5	Unsupervised	Home	Low risk	Low risk	High risk	Low risk	Low risk	Unclear	Low risk	12	Short	2024	742	1.574239714	0.442378536
3	49. Kongsgaard et al 2009	RCT	Patellar	Disability	VISA-P	Exercise only	Resistance	Resistance	Eccentric only	Eccentric only	12	32.4	8.8	0	24.7	2.5	Unsupervised	Home	Low risk	Low risk	High risk	Low risk	Low risk	Unclear	Low risk	26.07145714	Medium	2024	743	1.645796064	0.457140285
3	49. Kongsgaard et al 2009	RCT	Patellar	Pain	VAS- sporting activity	Exercise only	Resistance	Resistance	Eccentric only	Eccentric only	12	32.4	8.8	0	24.7	2.5	Unsupervised	Home	Low risk	Low risk	High risk	Low risk	Low risk	Unclear	Low risk	12	Short	2025	744	1.302325581	0.388101516
3	49. Kongsgaard et al 2009	RCT	Patellar	Pain	VAS- sporting activity	Exercise only	Resistance	Resistance	Eccentric only	Eccentric only	12	32.4	8.8	0	24.7	2.5	Unsupervised	Home	Low risk	Low risk	High risk	Low risk	Low risk	Unclear	Low risk	26.07145714	Medium	2025	745	1.720930233	0.472815808
3	58. Martinez-Silvestrini et al 2005	Quasi-experimental	Lateral elbow/tennis elbow	Physical function capacity	Dynamometer- painfree grip strength	Multiple exercise types	Resistance	Flexibility, Resistance	Eccentric only	Eccentric Only, Static	27	45.5	7.7	46.8	NA	NA	Unsupervised	NA	Unclear	Unclear	Unclear	Unclear	Low risk	Unclear	High risk	6	Short	2028	746	0.323624595	0.157818757
3	58. Martinez-Silvestrini et al 2005	Quasi-experimental	Lateral elbow/tennis elbow	Pain	VAS- pain	Multiple exercise types	Resistance	Flexibility, Resistance	Eccentric only	Eccentric Only, Static	27	45.5	7.7	46.8	NA	NA	Unsupervised	NA	Unclear	Unclear	Unclear	Unclear	Low risk	Unclear	High risk	6	Short	2029	747	1.067961165	0.216355061
3	58. Martinez-Silvestrini et al 2005	Quasi-experimental	Lateral elbow/tennis elbow	Disability	Patient rated forearm evaluation questionnaire	Multiple exercise types	Resistance	Flexibility, Resistance	Eccentric only	Eccentric Only, Static	27	45.5	7.7	46.8	NA	NA	Unsupervised	NA	Unclear	Unclear	Unclear	Unclear	Low risk	Unclear	High risk	6	Short	2030	748	1.359223301	0.248512187
3	58. Martinez-Silvestrini et al 2005	Quasi-experimental	Lateral elbow/tennis elbow	Function	DASH function	Multiple exercise types	Resistance	Flexibility, Resistance	Eccentric only	Eccentric Only, Static	27	45.5	7.7	46.8	NA	NA	Unsupervised	NA	Unclear	Unclear	Unclear	Unclear	Low risk	Unclear	High risk	6	Short	2031	749	0.672143391	0.179569484
3	98. Tahran et al 2020	RCT	Rotator cuff - subacromial impingement	Pain	VAS- rest	Exercise only	Flexibility	Flexibility	Static	Static	22	52.9	11	30.5	28.3	4.8	Supervised	Clinic	Low risk	Unclear	Low risk	Low risk	Low risk	Unclear	Low risk	4	Short	2032	750	0.747396365	0.207314183
3	98. Tahran et al 2020	RCT	Rotator cuff - subacromial impingement	Pain	VAS- activity	Exercise only	Flexibility	Flexibility	Static	Static	22	52.9	11	30.5	28.3	4.8	Supervised	Clinic	Low risk	Unclear	Low risk	Low risk	Low risk	Unclear	Low risk	4	Short	2033	751	3.012048193	0.520790575
3	98. Tahran et al 2020	RCT	Rotator cuff - subacromial impingement	ROM - Shoulder	ROM- int rotation	Exercise only	Flexibility	Flexibility	Static	Static	22	52.9	11	30.5	28.3	4.8	Supervised	Clinic	Low risk	Unclear	Low risk	Low risk	Low risk	Unclear	Low risk	4	Short	2034	752	1.453349233	0.290911612
3	98. Tahran et al 2020	RCT	Rotator cuff - subacromial impingement	ROM - Shoulder	ROM- ext rotation	Exercise only	Flexibility	Flexibility	Static	Static	22	52.9	11	30.5	28.3	4.8	Supervised	Clinic	Low risk	Unclear	Low risk	Low risk	Low risk	Unclear	Low risk	4	Short	2035	753	0.384434289	0.178790102
3	98. Tahran et al 2020	RCT	Rotator cuff - subacromial impingement	Physical function capacity	ROM- total rotation	Exercise only	Flexibility	Flexibility	Static	Static	22	52.9	11	30.5	28.3	4.8	Supervised	Clinic	Low risk	Unclear	Low risk	Low risk	Low risk	Unclear	Low risk	4	Short	2036	754	0.811249255	0.21365221
3	98. Tahran et al 2020	RCT	Rotator cuff - subacromial impingement	Disability	Constant-murley score	Exercise only	Flexibility	Flexibility	Static	Static	22	52.9	11	30.5	28.3	4.8	Supervised	Clinic	Low risk	Unclear	Low risk	Low risk	Low risk	Unclear	Low risk	4	Short	2037	755	1.399414693	0.28373356
3	98. Tahran et al 2020	RCT	Rotator cuff - subacromial impingement	Disability	QuickDASH	Exercise only	Flexibility	Flexibility	Static	Static	22	52.9	11	30.5	28.3	4.8	Supervised	Clinic	Low risk	Unclear	Low risk	Low risk	Low risk	Unclear	Low risk	4	Short	2038	756	1.689868281	0.323357202
3	25. Devereaux et al 2016	RCT	Rotator cuff - subacromial impingement	Pain	VAS- rest	Multiple exercise types	Proprioception	Flexibility, Proprioception, Resistance	Movement pattern retraining	Isometric, Dynamic, Static, Movement pattern retraining	29	48	11.9	37.86666667	NA	NA	Unsupervised	NA	Low risk	High risk	High risk	High risk	High risk	Unclear	Low risk	8.690485714	Short	2039	757	0	0.145234484
3	25. Devereaux et al 2016	RCT	Rotator cuff - subacromial impingement	Pain	VAS- activity	Multiple exercise types	Proprioception	Flexibility, Proprioception, Resistance	Movement pattern retraining	Isometric, Dynamic, Static, Movement pattern retraining	29	48	11.9	37.86666667	NA	NA	Unsupervised	NA	Low risk	High risk	High risk	High risk	High risk	Unclear	Low risk	8.690485714	Short	2040	758	0	0.145234484
3	25. Devereaux et al 2016	RCT	Rotator cuff - subacromial impingement	Disability	Constant score	Multiple exercise types	Proprioception	Flexibility, Proprioception, Resistance	Movement pattern retraining	Isometric, Dynamic, Static, Movement pattern retraining	29	48	11.9	37.86666667	NA	NA	Unsupervised	NA	Low risk	High risk	High risk	High risk	High risk	Unclear	Low risk	8.690485714	Short	2041	759	0	0.145234484
3	25. Devereaux et al 2016	RCT	Rotator cuff - subacromial impingement	Disability	Simple shoulder test score	Multiple exercise types	Proprioception	Flexibility, Proprioception, Resistance	Movement pattern retraining	Isometric, Dynamic, Static, Movement pattern retraining	29	48	11.9	37.86666667	NA	NA	Unsupervised	NA	Low risk	High risk	High risk	Low risk	High risk	Unclear	Low risk	8.690485714	Short	2042	760	0	0.145234484
3	36. Heron et al 2017	RCT	Rotator cuff - subacromial impingement	Disability	SPADI	Multiple exercise types	Resistance	Flexibility, Resistance	Concentric and eccentric	Concentric and eccentric, Static	40	49.9	NA	41	NA	NA	Unsupervised	NA	Low risk	Low risk	Low risk	Low risk	High risk	High risk	Low risk	26.07145714	Medium	2043	761	0.446368078	0.133879631
3	106. Walther et al 2004	RCT	Rotator cuff - subacromial impingement	Pain	VAS- rest	Multiple exercise types	Proprioception	Flexibility, Proprioception, Resistance	Movement pattern retraining	Movement pattern retraining, concentric and eccentric, static	20	50.73333333	NA	43.33333333	NA	NA	Supervised	NA	Unclear	Unclear	Unclear	Unclear	Low risk	Unclear	Unclear	6	Short	2044	762	0.61165702	0.205263826
3	106. Walther et al 2004	RCT	Rotator cuff - subacromial impingement	Pain	VAS- rest	Multiple exercise types	Proprioception	Flexibility, Proprioception, Resistance	Movement pattern retraining	Movement pattern retraining, concentric and eccentric, static	20	50.73333333	NA	43.33333333	NA	NA	Supervised	NA	Unclear	Unclear	Unclear	Unclear	Low risk	Unclear	Unclear	12	Short	2044	763	0.628886795	0.206821106
3	106. Walther et al 2004	RCT	Rotator cuff - subacromial impingement	Pain	VAS- loading	Multiple exercise types	Proprioception	Flexibility, Proprioception, Resistance	Movement pattern retraining	Movement pattern retraining, concentric and eccentric, static	20	50.73333333	NA	43.33333333	NA	NA	Supervised	NA	Unclear	Unclear	Unclear	Unclear	Low risk	Unclear	Unclear	6	Short	2045	764	0.613043303	0.205387954
3	106. Walther et al 2004	RCT	Rotator cuff - subacromial impingement	Pain	VAS- loading	Multiple exercise types	Proprioception	Flexibility, Proprioception, Resistance	Movement pattern retraining	Movement pattern retraining, concentric and eccentric, static	20	50.73333333	NA	43.33333333	NA	NA	Supervised	NA	Unclear	Unclear	Unclear	Unclear	Low risk	Unclear	Unclear	12	Short	2045	765	1.543363403	0.320024796
3	106. Walther et al 2004	RCT	Rotator cuff - subacromial impingement	Pain	VAS- night pain	Multiple exercise types	Proprioception	Flexibility, Proprioception, Resistance	Movement pattern retraining	Movement pattern retraining, concentric and eccentric, static	20	50.73333333	NA	43.33333333	NA	NA	Supervised	NA	Unclear	Unclear	Unclear	Unclear	Low risk	Unclear	Unclear	6	Short	2046	766	0.769382742	0.220619873
3	106. Walther et al 2004	RCT	Rotator cuff - subacromial impingement	Pain	VAS- night pain	Multiple exercise types	Proprioception	Flexibility, Proprioception, Resistance	Movement pattern retraining	Movement pattern retraining, concentric and eccentric, static	20	50.73333333	NA	43.33333333	NA	NA	Supervised	NA	Unclear	Unclear	Unclear	Unclear	Low risk	Unclear	Unclear	12	Short	2046	767	1.204769875	0.272908358
3	106. Walther et al 2004	RCT	Rotator cuff - subacromial impingement	Disability	Constant- mobility	Multiple exercise types	Proprioception	Flexibility, Proprioception, Resistance	Movement pattern retraining	Movement pattern retraining, concentric and eccentric, static	20	50.73333333	NA	43.33333333	NA	NA	Supervised	NA	Unclear	Unclear	Unclear	Unclear	Low risk	Unclear	Unclear	6	Short	2047	768	0.16551518	0.178110103
3	106. Walther et al 2004	RCT	Rotator cuff - subacromial impingement	Disability	Constant- mobility	Multiple exercise types	Proprioception	Flexibility, Proprioception, Resistance	Movement pattern retraining	Movement pattern retraining, concentric and eccentric, static	20	50.73333333	NA	43.33333333	NA	NA	Supervised	NA	Unclear	Unclear	Unclear	Unclear	Low risk	Unclear	Unclear	12	Short	2047	769	0.321835073	0.184419298
3	106. Walther et al 2004	RCT	Rotator cuff - subacromial impingement	Physical function capacity	Constant- muscle strength	Multiple exercise types	Proprioception	Flexibility, Proprioception, Resistance	Movement pattern retraining	Movement pattern retraining, concentric and eccentric, static	20	50.73333333	NA	43.33333333	NA	NA	Supervised	NA	Unclear	Unclear	Unclear	Unclear	Low risk	Unclear	Unclear	6	Short	2048	770	-0.154300586	0.177807554
3	106. Walther et al 2004	RCT	Rotator cuff - subacromial impingement	Physical function capacity	Constant- muscle strength	Multiple exercise types	Proprioception	Flexibility, Proprioception, Resistance	Movement pattern retraining	Movement pattern retraining, concentric and eccentric, static	20	50.73333333	NA	43.33333333	NA	NA	Supervised	NA	Unclear	Unclear	Unclear	Unclear	Low risk	Unclear	Unclear	12	Short	2048	771	-0.270026026	0.181906138
3	106. Walther et al 2004	RCT	Rotator cuff - subacromial impingement	Disability	Constant- total	Multiple exercise types	Proprioception	Flexibility, Proprioception, Resistance	Movement pattern retraining	Movement pattern retraining, concentric and eccentric, static	20	50.73333333	NA	43.33333333	NA	NA	Supervised	NA	Unclear	Unclear	Unclear	Unclear	Low risk	Unclear	Unclear	6	Short	2049	772	0.333147114	0.185021424
3	106. Walther et al 2004	RCT	Rotator cuff - subacromial impingement	Disability	Constant- total	Multiple exercise types	Proprioception	Flexibility, Proprioception, Resistance	Movement pattern retraining	Movement pattern retraining, concentric and eccentric, static	20	50.73333333	NA	43.33333333	NA	NA	Supervised	NA	Unclear	Unclear	Unclear	Unclear	Low risk	Unclear	Unclear	12	Short	2049	773	0.622602803	0.206249495
2	55. Maenhout et al 2013	RCT	Rotator cuff - subacromial impingement	Disability	SPADI	Exercise only	Resistance	Resistance	Eccentric only	Eccentric only,Concentric and eccentric	31	39.8	13	59	69.75	3.5	NA	Home	Unclear	High risk	High risk	High risk	Low risk	Unclear	Low risk	6	Short	2050	774	1.4710466	0.242583517
2	55. Maenhout et al 2013	RCT	Rotator cuff - subacromial impingement	Disability	SPADI	Exercise only	Resistance	Resistance	Eccentric only	Eccentric only,Concentric and eccentric	31	39.8	13	59	69.75	3.5	NA	Home	Unclear	High risk	High risk	High risk	Low risk	Unclear	Low risk	12	Short	2050	775	2.215431627	0.329367364
2	55. Maenhout et al 2013	RCT	Rotator cuff - subacromial impingement	Physical function capacity	Isometric strength abd 0	Exercise only	Resistance	Resistance	Eccentric only	Eccentric only,Concentric and eccentric	31	39.8	13	59	69.75	3.5	NA	Home	Unclear	High risk	High risk	High risk	Low risk	Unclear	Low risk	6	Short	2051	776	0.808793082	0.177586779
2	55. Maenhout et al 2013	RCT	Rotator cuff - subacromial impingement	Physical function capacity	Isometric strength abd 0	Exercise only	Resistance	Resistance	Eccentric only	Eccentric only,Concentric and eccentric	31	39.8	13	59	69.75	3.5	NA	Home	Unclear	High risk	High risk	High risk	Low risk	Unclear	Low risk	12	Short	2051	777	0.932407746	0.188229297
2	55. Maenhout et al 2013	RCT	Rotator cuff - subacromial impingement	Physical function capacity	Isometric strength abd 45	Exercise only	Resistance	Resistance	Eccentric only	Eccentric only,Concentric and eccentric	31	39.8	13	59	69.75	3.5	NA	Home	Unclear	High risk	High risk	High risk	Low risk	Unclear	Low risk	6	Short	2052	778	0.673635308	0.167071661
2	55. Maenhout et al 2013	RCT	Rotator cuff - subacromial impingement	Physical function capacity	Isometric strength abd 45	Exercise only	Resistance	Resistance	Eccentric only	Eccentric only,Concentric and eccentric	31	39.8	13	59	69.75	3.5	NA	Home	Unclear	High risk	High risk	High risk	Low risk	Unclear	Low risk	12	Short	2052	779	0.824212612	0.178864532
2	55. Maenhout et al 2013	RCT	Rotator cuff - subacromial impingement	Physical function capacity	Isometric strength abd 90	Exercise only	Resistance	Resistance	Eccentric only	Eccentric only,Concentric and eccentric	31	39.8	13	59	69.75	3.5	NA	Home	Unclear	High risk	High risk	High risk	Low risk	Unclear	Low risk	6	Short	2053	780	0.781379218	0.175352679
2	55. Maenhout et al 2013	RCT	Rotator cuff - subacromial impingement	Physical function capacity	Isometric strength abd 90	Exercise only	Resistance	Resistance	Eccentric only	Eccentric only,Concentric and eccentric	31	39.8	13	59	69.75	3.5	NA	Home	Unclear	High risk	High risk	High risk	Low risk	Unclear	Low risk	12	Short	2053	781	1.028944911	0.197116957
2	55. Maenhout et al 2013	RCT	Rotator cuff - subacromial impingement	Physical function capacity	Isometric strength ext rot	Exercise only	Resistance	Resistance	Eccentric only	Eccentric only,Concentric and eccentric	31	39.8	13	59	69.75	3.5	NA	Home	Unclear	High risk	High risk	High risk	Low risk	Unclear	Low risk	6	Short	2054	782	0.889008403	0.184392111
2	55. Maenhout et al 2013	RCT	Rotator cuff - subacromial impingement	Physical function capacity	Isometric strength ext rot	Exercise only	Resistance	Resistance	Eccentric only	Eccentric only,Concentric and eccentric	31	39.8	13	59	69.75	3.5	NA	Home	Unclear	High risk	High risk	High risk	Low risk	Unclear	Low risk	12	Short	2054	783	1.021579832	0.196422825
2	55. Maenhout et al 2013	RCT	Rotator cuff - subacromial impingement	Physical function capacity	Isometric strength int rot	Exercise only	Resistance	Resistance	Eccentric only	Eccentric only,Concentric and eccentric	31	39.8	13	59	69.75	3.5	NA	Home	Unclear	High risk	High risk	High risk	Low risk	Unclear	Low risk	6	Short	2055	784	0.261396179	0.144709492
2	55. Maenhout et al 2013	RCT	Rotator cuff - subacromial impingement	Physical function capacity	Isometric strength int rot	Exercise only	Resistance	Resistance	Eccentric only	Eccentric only,Concentric and eccentric	31	39.8	13	59	69.75	3.5	NA	Home	Unclear	High risk	High risk	High risk	Low risk	Unclear	Low risk	12	Short	2055	785	0.397540022	0.150211535
2	50. Kromer et al 2014	RCT	Rotator cuff - subacromial impingement	Disability	SPADI	Multiple exercise types	Resistance	Flexibility, Proprioception, Resistance	Concentric and eccentric	concentric and eccentric, static, movement pattern retraining	44	51.8	11.2	51.1	26	4.1	Unsupervised	Home	Low risk	Low risk	High risk	High risk	Low risk	Low risk	Low risk	5	Short	2056	786	0.837977296	0.149813445
2	50. Kromer et al 2014	RCT	Rotator cuff - subacromial impingement	Disability	SPADI	Multiple exercise types	Resistance	Flexibility, Proprioception, Resistance	Concentric and eccentric	concentric and eccentric, static, movement pattern retraining	44	51.8	11.2	51.1	26	4.1	Unsupervised	Home	Low risk	Low risk	High risk	High risk	Low risk	Low risk	Low risk	12	Short	2056	787	1.24251806	0.181106732
2	50. Kromer et al 2014	RCT	Rotator cuff - subacromial impingement	Disability	SPADI	Multiple exercise types	Resistance	Flexibility, Proprioception, Resistance	Concentric and eccentric	concentric and eccentric, static, movement pattern retraining	44	51.8	11.2	51.1	26	4.1	Unsupervised	Home	Low risk	Low risk	High risk	High risk	Low risk	Low risk	Low risk	52	Medium	2056	788	1.797316821	0.231409287
2	50. Kromer et al 2014	RCT	Rotator cuff - subacromial impingement	Disability	SPADI- pain	Multiple exercise types	Resistance	Flexibility, Proprioception, Resistance	Concentric and eccentric	concentric and eccentric, static, movement pattern retraining	44	51.8	11.2	51.1	26	4.1	Unsupervised	Home	Low risk	Low risk	High risk	High risk	Low risk	Low risk	Low risk	5	Short	2057	789	1.027887638	0.163719104
2	50. Kromer et al 2014	RCT	Rotator cuff - subacromial impingement	Disability	SPADI- pain	Multiple exercise types	Resistance	Flexibility, Proprioception, Resistance	Concentric and eccentric	concentric and eccentric, static, movement pattern retraining	44	51.8	11.2	51.1	26	4.1	Unsupervised	Home	Low risk	Low risk	High risk	High risk	Low risk	Low risk	Low risk	12	Short	2057	790	1.448128993	0.199013899
2	50. Kromer et al 2014	RCT	Rotator cuff - subacromial impingement	Disability	SPADI- pain	Multiple exercise types	Resistance	Flexibility, Proprioception, Resistance	Concentric and eccentric	concentric and eccentric, static, movement pattern retraining	44	51.8	11.2	51.1	26	4.1	Unsupervised	Home	Low risk	Low risk	High risk	High risk	Low risk	Low risk	Low risk	52	Medium	2057	791	2.237501268	0.274595893
2	50. Kromer et al 2014	RCT	Rotator cuff - subacromial impingement	Function	SPADI- function	Multiple exercise types	Resistance	Flexibility, Proprioception, Resistance	Concentric and eccentric	concentric and eccentric, static, movement pattern retraining	44	51.8	11.2	51.1	26	4.1	Unsupervised	Home	Low risk	Low risk	High risk	High risk	Low risk	Low risk	Low risk	5	Short	2058	792	0.549768203	0.13237432
2	50. Kromer et al 2014	RCT	Rotator cuff - subacromial impingement	Function	SPADI- function	Multiple exercise types	Resistance	Flexibility, Proprioception, Resistance	Concentric and eccentric	concentric and eccentric, static, movement pattern retraining	44	51.8	11.2	51.1	26	4.1	Unsupervised	Home	Low risk	Low risk	High risk	High risk	Low risk	Low risk	Low risk	12	Short	2058	793	0.88573766	0.15315677
2	50. Kromer et al 2014	RCT	Rotator cuff - subacromial impingement	Function	SPADI- function	Multiple exercise types	Resistance	Flexibility, Proprioception, Resistance	Concentric and eccentric	concentric and eccentric, static, movement pattern retraining	44	51.8	11.2	51.1	26	4.1	Unsupervised	Home	Low risk	Low risk	High risk	High risk	Low risk	Low risk	Low risk	52	Medium	2058	794	1.282792473	0.184529209
2	50. Kromer et al 2014	RCT	Rotator cuff - subacromial impingement	Function	GPSS	Multiple exercise types	Resistance	Flexibility, Proprioception, Resistance	Concentric and eccentric	concentric and eccentric, static, movement pattern retraining	44	51.8	11.2	51.1	26	4.1	Unsupervised	Home	Low risk	Low risk	High risk	High risk	Low risk	Low risk	Low risk	5	Short	2059	795	1.329205366	0.188527569
2	50. Kromer et al 2014	RCT	Rotator cuff - subacromial impingement	Function	GPSS	Multiple exercise types	Resistance	Flexibility, Proprioception, Resistance	Concentric and eccentric	concentric and eccentric, static, movement pattern retraining	44	51.8	11.2	51.1	26	4.1	Unsupervised	Home	Low risk	Low risk	High risk	High risk	Low risk	Low risk	Low risk	12	Short	2059	796	1.964912281	0.247605156
2	50. Kromer et al 2014	RCT	Rotator cuff - subacromial impingement	Function	GPSS	Multiple exercise types	Resistance	Flexibility, Proprioception, Resistance	Concentric and eccentric	concentric and eccentric, static, movement pattern retraining	44	51.8	11.2	51.1	26	4.1	Unsupervised	Home	Low risk	Low risk	High risk	High risk	Low risk	Low risk	Low risk	52	Medium	2059	797	2.658410733	0.31742423
2	86. Seven et al 2017	RCT	Rotator cuff - subacromial impingement	Pain	VAS- activity	Exercise only	Proprioception	Proprioception	Movement pattern retraining	Movement pattern retraining	44	48.5	11.6	45.45	NA	NA	Unsupervised	Home	Low risk	Low risk	High risk	Low risk	High risk	Unclear	Low risk	3	Short	2060	798	0.51970506	0.130871565
2	86. Seven et al 2017	RCT	Rotator cuff - subacromial impingement	Pain	VAS- activity	Exercise only	Proprioception	Proprioception	Movement pattern retraining	Movement pattern retraining	44	48.5	11.6	45.45	NA	NA	Unsupervised	Home	Low risk	Low risk	High risk	Low risk	High risk	Unclear	Low risk	6	Short	2060	799	2.114416476	0.262320836
2	86. Seven et al 2017	RCT	Rotator cuff - subacromial impingement	Pain	VAS- activity	Exercise only	Proprioception	Proprioception	Movement pattern retraining	Movement pattern retraining	44	48.5	11.6	45.45	NA	NA	Unsupervised	Home	Low risk	Low risk	High risk	Low risk	High risk	Unclear	Low risk	12	Short	2060	800	2.392067124	0.290184938
2	86. Seven et al 2017	RCT	Rotator cuff - subacromial impingement	Pain	VAS- activity	Exercise only	Proprioception	Proprioception	Movement pattern retraining	Movement pattern retraining	44	48.5	11.6	45.45	NA	NA	Unsupervised	Home	Low risk	Low risk	High risk	Low risk	High risk	Unclear	Low risk	54	Long	2060	801	2.555809814	0.30688062
2	86. Seven et al 2017	RCT	Rotator cuff - subacromial impingement	Disability	WORC	Exercise only	Proprioception	Proprioception	Movement pattern retraining	Movement pattern retraining	44	48.5	11.6	45.45	NA	NA	Unsupervised	Home	Low risk	Low risk	High risk	Low risk	High risk	Unclear	Low risk	3	Short	2061	802	0.540565387	0.131907167
2	86. Seven et al 2017	RCT	Rotator cuff - subacromial impingement	Disability	WORC	Exercise only	Proprioception	Proprioception	Movement pattern retraining	Movement pattern retraining	44	48.5	11.6	45.45	NA	NA	Unsupervised	Home	Low risk	Low risk	High risk	Low risk	High risk	Unclear	Low risk	6	Short	2061	803	1.361219643	0.191317564
2	86. Seven et al 2017	RCT	Rotator cuff - subacromial impingement	Disability	WORC	Exercise only	Proprioception	Proprioception	Movement pattern retraining	Movement pattern retraining	44	48.5	11.6	45.45	NA	NA	Unsupervised	Home	Low risk	Low risk	High risk	Low risk	High risk	Unclear	Low risk	12	Short	2061	804	1.738757374	0.225837259
2	86. Seven et al 2017	RCT	Rotator cuff - subacromial impingement	Disability	WORC	Exercise only	Proprioception	Proprioception	Movement pattern retraining	Movement pattern retraining	44	48.5	11.6	45.45	NA	NA	Unsupervised	Home	Low risk	Low risk	High risk	Low risk	High risk	Unclear	Low risk	54	Long	2061	805	1.918945836	0.24312902
2	86. Seven et al 2017	RCT	Rotator cuff - subacromial impingement	Disability	SPADI	Exercise only	Proprioception	Proprioception	Movement pattern retraining	Movement pattern retraining	44	48.5	11.6	45.45	NA	NA	Unsupervised	Home	Low risk	Low risk	High risk	Low risk	High risk	Unclear	Low risk	3	Short	2062	806	0.477743378	0.128889055
2	86. Seven et al 2017	RCT	Rotator cuff - subacromial impingement	Disability	SPADI	Exercise only	Proprioception	Proprioception	Movement pattern retraining	Movement pattern retraining	44	48.5	11.6	45.45	NA	NA	Unsupervised	Home	Low risk	Low risk	High risk	Low risk	High risk	Unclear	Low risk	6	Short	2062	807	1.283453732	0.184585775
2	86. Seven et al 2017	RCT	Rotator cuff - subacromial impingement	Disability	SPADI	Exercise only	Proprioception	Proprioception	Movement pattern retraining	Movement pattern retraining	44	48.5	11.6	45.45	NA	NA	Unsupervised	Home	Low risk	Low risk	High risk	Low risk	High risk	Unclear	Low risk	12	Short	2062	808	1.510767114	0.204663007
2	86. Seven et al 2017	RCT	Rotator cuff - subacromial impingement	Disability	SPADI	Exercise only	Proprioception	Proprioception	Movement pattern retraining	Movement pattern retraining	44	48.5	11.6	45.45	NA	NA	Unsupervised	Home	Low risk	Low risk	High risk	Low risk	High risk	Unclear	Low risk	54	Long	2062	809	1.622015824	0.214883931
2	86. Seven et al 2017	RCT	Rotator cuff - subacromial impingement	ROM - Shoulder	ROM- flexion	Exercise only	Proprioception	Proprioception	Movement pattern retraining	Movement pattern retraining	44	48.5	11.6	45.45	NA	NA	Unsupervised	Home	Low risk	Low risk	High risk	Low risk	High risk	Unclear	Low risk	3	Short	2063	810	0.390839326	0.125234353
2	86. Seven et al 2017	RCT	Rotator cuff - subacromial impingement	ROM - Shoulder	ROM- flexion	Exercise only	Proprioception	Proprioception	Movement pattern retraining	Movement pattern retraining	44	48.5	11.6	45.45	NA	NA	Unsupervised	Home	Low risk	Low risk	High risk	Low risk	High risk	Unclear	Low risk	6	Short	2063	811	0.785062542	0.146244211
2	86. Seven et al 2017	RCT	Rotator cuff - subacromial impingement	ROM - Shoulder	ROM- flexion	Exercise only	Proprioception	Proprioception	Movement pattern retraining	Movement pattern retraining	44	48.5	11.6	45.45	NA	NA	Unsupervised	Home	Low risk	Low risk	High risk	Low risk	High risk	Unclear	Low risk	12	Short	2063	812	0.881221423	0.152835894
2	86. Seven et al 2017	RCT	Rotator cuff - subacromial impingement	ROM - Shoulder	ROM- flexion	Exercise only	Proprioception	Proprioception	Movement pattern retraining	Movement pattern retraining	44	48.5	11.6	45.45	NA	NA	Unsupervised	Home	Low risk	Low risk	High risk	Low risk	High risk	Unclear	Low risk	54	Long	2063	813	0.91957218	0.155590954
2	86. Seven et al 2017	RCT	Rotator cuff - subacromial impingement	ROM - Shoulder	ROM- abduction	Exercise only	Proprioception	Proprioception	Movement pattern retraining	Movement pattern retraining	44	48.5	11.6	45.45	NA	NA	Unsupervised	Home	Low risk	Low risk	High risk	Low risk	High risk	Unclear	Low risk	3	Short	2064	814	0.394233993	0.125365203
2	86. Seven et al 2017	RCT	Rotator cuff - subacromial impingement	ROM - Shoulder	ROM- abduction	Exercise only	Proprioception	Proprioception	Movement pattern retraining	Movement pattern retraining	44	48.5	11.6	45.45	NA	NA	Unsupervised	Home	Low risk	Low risk	High risk	Low risk	High risk	Unclear	Low risk	6	Short	2064	815	0.846778208	0.15042109
2	86. Seven et al 2017	RCT	Rotator cuff - subacromial impingement	ROM - Shoulder	ROM- abduction	Exercise only	Proprioception	Proprioception	Movement pattern retraining	Movement pattern retraining	44	48.5	11.6	45.45	NA	NA	Unsupervised	Home	Low risk	Low risk	High risk	Low risk	High risk	Unclear	Low risk	12	Short	2064	816	0.963114213	0.158799167
2	86. Seven et al 2017	RCT	Rotator cuff - subacromial impingement	ROM - Shoulder	ROM- abduction	Exercise only	Proprioception	Proprioception	Movement pattern retraining	Movement pattern retraining	44	48.5	11.6	45.45	NA	NA	Unsupervised	Home	Low risk	Low risk	High risk	Low risk	High risk	Unclear	Low risk	54	Long	2064	817	1.027682118	0.163703229
2	86. Seven et al 2017	RCT	Rotator cuff - subacromial impingement	ROM - Shoulder	ROM- int rotation	Exercise only	Proprioception	Proprioception	Movement pattern retraining	Movement pattern retraining	44	48.5	11.6	45.45	NA	NA	Unsupervised	Home	Low risk	Low risk	High risk	Low risk	High risk	Unclear	Low risk	3	Short	2065	818	0.364337955	0.124247338
2	86. Seven et al 2017	RCT	Rotator cuff - subacromial impingement	ROM - Shoulder	ROM- int rotation	Exercise only	Proprioception	Proprioception	Movement pattern retraining	Movement pattern retraining	44	48.5	11.6	45.45	NA	NA	Unsupervised	Home	Low risk	Low risk	High risk	Low risk	High risk	Unclear	Low risk	6	Short	2065	819	0.535828061	0.131669131
2	86. Seven et al 2017	RCT	Rotator cuff - subacromial impingement	ROM - Shoulder	ROM- int rotation	Exercise only	Proprioception	Proprioception	Movement pattern retraining	Movement pattern retraining	44	48.5	11.6	45.45	NA	NA	Unsupervised	Home	Low risk	Low risk	High risk	Low risk	High risk	Unclear	Low risk	12	Short	2065	820	0.571005519	0.133475925
2	86. Seven et al 2017	RCT	Rotator cuff - subacromial impingement	ROM - Shoulder	ROM- int rotation	Exercise only	Proprioception	Proprioception	Movement pattern retraining	Movement pattern retraining	44	48.5	11.6	45.45	NA	NA	Unsupervised	Home	Low risk	Low risk	High risk	Low risk	High risk	Unclear	Low risk	54	Long	2065	821	0.599901288	0.135026361
2	86. Seven et al 2017	RCT	Rotator cuff - subacromial impingement	ROM - Shoulder	ROM- ext rotation	Exercise only	Proprioception	Proprioception	Movement pattern retraining	Movement pattern retraining	44	48.5	11.6	45.45	NA	NA	Unsupervised	Home	Low risk	Low risk	High risk	Low risk	High risk	Unclear	Low risk	3	Short	2066	822	0.252144813	0.120774148
2	86. Seven et al 2017	RCT	Rotator cuff - subacromial impingement	ROM - Shoulder	ROM- ext rotation	Exercise only	Proprioception	Proprioception	Movement pattern retraining	Movement pattern retraining	44	48.5	11.6	45.45	NA	NA	Unsupervised	Home	Low risk	Low risk	High risk	Low risk	High risk	Unclear	Low risk	6	Short	2066	823	0.342439915	0.123478629
2	86. Seven et al 2017	RCT	Rotator cuff - subacromial impingement	ROM - Shoulder	ROM- ext rotation	Exercise only	Proprioception	Proprioception	Movement pattern retraining	Movement pattern retraining	44	48.5	11.6	45.45	NA	NA	Unsupervised	Home	Low risk	Low risk	High risk	Low risk	High risk	Unclear	Low risk	12	Short	2066	824	0.41342663	0.126123589
2	86. Seven et al 2017	RCT	Rotator cuff - subacromial impingement	ROM - Shoulder	ROM- ext rotation	Exercise only	Proprioception	Proprioception	Movement pattern retraining	Movement pattern retraining	44	48.5	11.6	45.45	NA	NA	Unsupervised	Home	Low risk	Low risk	High risk	Low risk	High risk	Unclear	Low risk	54	Long	2066	825	0.41342663	0.126123589
2	11. Baskurt et al 2011	Quasi-experimental	Rotator cuff - subacromial impingement	Pain	VAS- rest	Multiple exercise types	Proprioception	Flexibility, Proprioception, Resistance	Movement pattern retraining	Movement pattern retraining, PNF, static, dynamic, concentric and eccentric	20	51.38	9.97	67.5	25.84	3.05	Supervised	Clinic	Low risk	Unclear	High risk	Unclear	Low risk	Unclear	Low risk	6	Short	2067	826	1.393548387	0.298673254
2	11. Baskurt et al 2011	Quasi-experimental	Rotator cuff - subacromial impingement	Pain	VAS- activity	Multiple exercise types	Proprioception	Flexibility, Proprioception, Resistance	Movement pattern retraining	Movement pattern retraining, PNF, static, dynamic, concentric and eccentric	20	51.38	9.97	67.5	25.84	3.05	Supervised	Clinic	Low risk	Unclear	High risk	Unclear	Low risk	Unclear	Low risk	6	Short	2068	827	3.817322835	0.684399141
2	11. Baskurt et al 2011	Quasi-experimental	Rotator cuff - subacromial impingement	ROM - Shoulder	ROM- flexion	Multiple exercise types	Proprioception	Flexibility, Proprioception, Resistance	Movement pattern retraining	Movement pattern retraining, PNF, static, dynamic, concentric and eccentric	20	51.38	9.97	67.5	25.84	3.05	Supervised	Clinic	Low risk	Unclear	Low risk	Unclear	Low risk	Unclear	Low risk	6	Short	2069	828	0.76663709	0.22033272
2	11. Baskurt et al 2011	Quasi-experimental	Rotator cuff - subacromial impingement	ROM - Shoulder	ROM- abduction	Multiple exercise types	Proprioception	Flexibility, Proprioception, Resistance	Movement pattern retraining	Movement pattern retraining, PNF, static, dynamic, concentric and eccentric	20	51.38	9.97	67.5	25.84	3.05	Supervised	Clinic	Low risk	Unclear	Low risk	Unclear	Low risk	Unclear	Low risk	6	Short	2070	829	0.594631796	0.203756312
2	11. Baskurt et al 2011	Quasi-experimental	Rotator cuff - subacromial impingement	ROM - Shoulder	ROM- int rotation	Multiple exercise types	Proprioception	Flexibility, Proprioception, Resistance	Movement pattern retraining	Movement pattern retraining, PNF, static, dynamic, concentric and eccentric	20	51.38	9.97	67.5	25.84	3.05	Supervised	Clinic	Low risk	Unclear	Low risk	Unclear	Low risk	Unclear	Low risk	6	Short	2071	830	0.663254862	0.210019682
2	11. Baskurt et al 2011	Quasi-experimental	Rotator cuff - subacromial impingement	ROM - Shoulder	ROM- ext rotation	Multiple exercise types	Proprioception	Flexibility, Proprioception, Resistance	Movement pattern retraining	Movement pattern retraining, PNF, static, dynamic, concentric and eccentric	20	51.38	9.97	67.5	25.84	3.05	Supervised	Clinic	Low risk	Unclear	Low risk	Unclear	Low risk	Unclear	Low risk	6	Short	2072	831	0.746917205	0.218289697
2	11. Baskurt et al 2011	Quasi-experimental	Rotator cuff - subacromial impingement	Physical function capacity	Strength- Lower trapz	Multiple exercise types	Proprioception	Flexibility, Proprioception, Resistance	Movement pattern retraining	Movement pattern retraining, PNF, static, dynamic, concentric and eccentric	20	51.38	9.97	67.5	25.84	3.05	Supervised	Clinic	Low risk	Unclear	Low risk	Unclear	Low risk	Unclear	Low risk	6	Short	2073	832	0.667549669	0.210427821
2	11. Baskurt et al 2011	Quasi-experimental	Rotator cuff - subacromial impingement	Physical function capacity	Strength- Upper trapz	Multiple exercise types	Proprioception	Flexibility, Proprioception, Resistance	Movement pattern retraining	Movement pattern retraining, PNF, static, dynamic, concentric and eccentric	20	51.38	9.97	67.5	25.84	3.05	Supervised	Clinic	Low risk	Unclear	Low risk	Unclear	Low risk	Unclear	Low risk	6	Short	2074	833	0.704680851	0.214031874
2	11. Baskurt et al 2011	Quasi-experimental	Rotator cuff - subacromial impingement	Physical function capacity	Strength- Middle trapz	Multiple exercise types	Proprioception	Flexibility, Proprioception, Resistance	Movement pattern retraining	Movement pattern retraining, PNF, static, dynamic, concentric and eccentric	20	51.38	9.97	67.5	25.84	3.05	Supervised	Clinic	Low risk	Unclear	Low risk	Unclear	Low risk	Unclear	Low risk	6	Short	2075	834	0.745945946	0.218189961
2	11. Baskurt et al 2011	Quasi-experimental	Rotator cuff - subacromial impingement	Physical function capacity	Strength- serratus anterior	Multiple exercise types	Proprioception	Flexibility, Proprioception, Resistance	Movement pattern retraining	Movement pattern retraining, PNF, static, dynamic, concentric and eccentric	20	51.38	9.97	67.5	25.84	3.05	Supervised	Clinic	Low risk	Unclear	Low risk	Unclear	Low risk	Unclear	Low risk	6	Short	2076	835	0.884210526	0.233182224
2	11. Baskurt et al 2011	Quasi-experimental	Rotator cuff - subacromial impingement	Physical function capacity	Strength- Supraspinatus	Multiple exercise types	Proprioception	Flexibility, Proprioception, Resistance	Movement pattern retraining	Movement pattern retraining, PNF, static, dynamic, concentric and eccentric	20	51.38	9.97	67.5	25.84	3.05	Supervised	Clinic	Low risk	Unclear	Low risk	Unclear	Low risk	Unclear	Low risk	6	Short	2077	836	0.818028169	0.225813094
2	11. Baskurt et al 2011	Quasi-experimental	Rotator cuff - subacromial impingement	Physical function capacity	Strength- Subscapularis	Multiple exercise types	Proprioception	Flexibility, Proprioception, Resistance	Movement pattern retraining	Movement pattern retraining, PNF, static, dynamic, concentric and eccentric	20	51.38	9.97	67.5	25.84	3.05	Supervised	Clinic	Low risk	Unclear	Low risk	Unclear	Low risk	Unclear	Low risk	6	Short	2078	837	0.460540541	0.193050833
2	11. Baskurt et al 2011	Quasi-experimental	Rotator cuff - subacromial impingement	Physical function capacity	Strength- Infraspinatus	Multiple exercise types	Proprioception	Flexibility, Proprioception, Resistance	Movement pattern retraining	Movement pattern retraining, PNF, static, dynamic, concentric and eccentric	20	51.38	9.97	67.5	25.84	3.05	Supervised	Clinic	Low risk	Unclear	Low risk	Unclear	Low risk	Unclear	Low risk	6	Short	2079	838	0.759272727	0.219565759
2	11. Baskurt et al 2011	Quasi-experimental	Rotator cuff - subacromial impingement	Disability	WORC	Multiple exercise types	Proprioception	Flexibility, Proprioception, Resistance	Movement pattern retraining	Movement pattern retraining, PNF, static, dynamic, concentric and eccentric	20	51.38	9.97	67.5	25.84	3.05	Supervised	Clinic	Low risk	Unclear	High risk	Unclear	Low risk	Unclear	Low risk	6	Short	2080	839	2.221746881	0.423204001
2	5. Arias-Buria et al 2015	RCT	Rotator cuff - subacromial impingement	Pain	VAS- current pain	Exercise only	Resistance	Resistance	Concentric and eccentric	Concentric and eccentric	19	57.47	6.42	75	NA	NA	Unsupervised	Home	Low risk	Low risk	High risk	Low risk	Low risk	Unclear	Low risk	2	Short	2081	840	2.325955734	0.453183097
2	5. Arias-Buria et al 2015	RCT	Rotator cuff - subacromial impingement	Pain	VAS- current pain	Exercise only	Resistance	Resistance	Concentric and eccentric	Concentric and eccentric	19	57.47	6.42	75	NA	NA	Unsupervised	Home	Low risk	Low risk	High risk	Low risk	Low risk	Unclear	Low risk	5	Short	2081	841	5.062374245	0.922543017
2	5. Arias-Buria et al 2015	RCT	Rotator cuff - subacromial impingement	Pain	VAS- max pain past week	Exercise only	Resistance	Resistance	Concentric and eccentric	Concentric and eccentric	19	57.47	6.42	75	NA	NA	Unsupervised	Home	Low risk	Low risk	High risk	Low risk	Low risk	Unclear	Low risk	2	Short	2082	842	1.915492958	0.387003945
2	5. Arias-Buria et al 2015	RCT	Rotator cuff - subacromial impingement	Pain	VAS- max pain past week	Exercise only	Resistance	Resistance	Concentric and eccentric	Concentric and eccentric	19	57.47	6.42	75	NA	NA	Unsupervised	Home	Low risk	Low risk	High risk	Low risk	Low risk	Unclear	Low risk	5	Short	2082	843	2.46277666	0.475710762
2	5. Arias-Buria et al 2015	RCT	Rotator cuff - subacromial impingement	Pain	VAS- min pain past week	Exercise only	Resistance	Resistance	Concentric and eccentric	Concentric and eccentric	19	57.47	6.42	75	NA	NA	Unsupervised	Home	Low risk	Low risk	High risk	Low risk	Low risk	Unclear	Low risk	2	Short	2083	844	1.053521127	0.260836809
2	5. Arias-Buria et al 2015	RCT	Rotator cuff - subacromial impingement	Pain	VAS- min pain past week	Exercise only	Resistance	Resistance	Concentric and eccentric	Concentric and eccentric	19	57.47	6.42	75	NA	NA	Unsupervised	Home	Low risk	Low risk	High risk	Low risk	Low risk	Unclear	Low risk	5	Short	2083	845	3.543661972	0.658522275
2	5. Arias-Buria et al 2015	RCT	Rotator cuff - subacromial impingement	Disability	DASH	Exercise only	Resistance	Resistance	Concentric and eccentric	Concentric and eccentric	19	57.47	6.42	75	NA	NA	Unsupervised	Home	Low risk	Low risk	High risk	Low risk	Low risk	Unclear	Low risk	2	Short	2084	846	1.988364972	0.39856978
2	5. Arias-Buria et al 2015	RCT	Rotator cuff - subacromial impingement	Disability	DASH	Exercise only	Resistance	Resistance	Concentric and eccentric	Concentric and eccentric	19	57.47	6.42	75	NA	NA	Unsupervised	Home	Low risk	Low risk	High risk	Low risk	Low risk	Unclear	Low risk	5	Short	2084	847	3.830985915	0.708043541
2	13. Blume et al 2015	RCT	Rotator cuff - subacromial impingement	Disability	DASH	Multiple exercise types	Resistance	Flexibility, Resistance	Eccentric only	Eccentric only, static, dynamic	18	49.4	15.6	58	NA	NA	Supervised	Clinic	Unclear	Low risk	Low risk	Low risk	Low risk	Unclear	Low risk	5	Short	2084	848	0.892143058	0.248237065
2	13. Blume et al 2015	RCT	Rotator cuff - subacromial impingement	Disability	DASH	Multiple exercise types	Resistance	Flexibility, Resistance	Eccentric only	Eccentric only, static, dynamic	18	49.4	15.6	58	NA	NA	Supervised	Clinic	Unclear	Low risk	Low risk	Low risk	Low risk	Unclear	Low risk	8	Short	2084	849	1.16248944	0.283848799
2	13. Blume et al 2015	RCT	Rotator cuff - subacromial impingement	ROM - Shoulder	AROM- elevation	Multiple exercise types	Resistance	Flexibility, Resistance	Eccentric only	Eccentric only, static, dynamic	18	49.4	15.6	58	NA	NA	Supervised	Clinic	Unclear	Low risk	Low risk	Low risk	Low risk	Unclear	Low risk	5	Short	2085	850	0.695402985	0.225758694
2	13. Blume et al 2015	RCT	Rotator cuff - subacromial impingement	Physical function capacity	Dynamometer- abduction	Multiple exercise types	Resistance	Flexibility, Resistance	Eccentric only	Eccentric only, static, dynamic	18	49.4	15.6	58	NA	NA	Supervised	Clinic	Unclear	Low risk	Low risk	Low risk	Low risk	Unclear	Low risk	5	Short	2086	851	0.539239287	0.21068883
2	13. Blume et al 2015	RCT	Rotator cuff - subacromial impingement	Physical function capacity	Dynamometer- abduction	Multiple exercise types	Resistance	Flexibility, Resistance	Eccentric only	Eccentric only, static, dynamic	18	49.4	15.6	58	NA	NA	Supervised	Clinic	Unclear	Low risk	Low risk	Low risk	Low risk	Unclear	Low risk	8	Short	2086	852	0.901299952	0.249362902
2	13. Blume et al 2015	RCT	Rotator cuff - subacromial impingement	Physical function capacity	Dynamometer- ext rotation	Multiple exercise types	Resistance	Flexibility, Resistance	Eccentric only	Eccentric only, static, dynamic	18	49.4	15.6	58	NA	NA	Supervised	Clinic	Unclear	Low risk	Low risk	Low risk	Low risk	Unclear	Low risk	5	Short	2087	853	0.408141113	0.200382015
2	13. Blume et al 2015	RCT	Rotator cuff - subacromial impingement	Physical function capacity	Dynamometer- ext rotation	Multiple exercise types	Resistance	Flexibility, Resistance	Eccentric only	Eccentric only, static, dynamic	18	49.4	15.6	58	NA	NA	Supervised	Clinic	Unclear	Low risk	Low risk	Low risk	Low risk	Unclear	Low risk	8	Short	2087	854	0.720759837	0.228455613
2	14. Boudreau et al 2019	RCT	Rotator cuff - subacromial impingement	Disability	DASH	Exercise only	Resistance	Resistance	Concentric and eccentric	Concentric and eccentric	21	42.9	11.96	52.38	NA	NA	Unsupervised	Home	Low risk	Low risk	Low risk	Low risk	Low risk	Low risk	Low risk	3	Short	2088	855	0.179991833	0.174064285
2	14. Boudreau et al 2019	RCT	Rotator cuff - subacromial impingement	Disability	DASH	Exercise only	Resistance	Resistance	Concentric and eccentric	Concentric and eccentric	21	42.9	11.96	52.38	NA	NA	Unsupervised	Home	Low risk	Low risk	Low risk	Low risk	Low risk	Low risk	Low risk	6	Short	2088	856	0.254471213	0.176677498
2	14. Boudreau et al 2019	RCT	Rotator cuff - subacromial impingement	Disability	WORC	Exercise only	Resistance	Resistance	Concentric and eccentric	Concentric and eccentric	21	42.9	11.96	52.38	NA	NA	Unsupervised	Home	Low risk	Low risk	Low risk	Low risk	Low risk	Low risk	Low risk	3	Short	2089	857	0.496364126	0.190681453
2	14. Boudreau et al 2019	RCT	Rotator cuff - subacromial impingement	Disability	WORC	Exercise only	Resistance	Resistance	Concentric and eccentric	Concentric and eccentric	21	42.9	11.96	52.38	NA	NA	Unsupervised	Home	Low risk	Low risk	Low risk	Low risk	Low risk	Low risk	Low risk	6	Short	2089	858	0.752221923	0.21309202
2	14. Boudreau et al 2019	RCT	Rotator cuff - subacromial impingement	Pain	VAS- rest	Exercise only	Resistance	Resistance	Concentric and eccentric	Concentric and eccentric	21	42.9	11.96	52.38	NA	NA	Unsupervised	Home	Low risk	Low risk	Low risk	Low risk	Low risk	Low risk	Low risk	3	Short	2090	859	0.072801916	0.171845419
2	14. Boudreau et al 2019	RCT	Rotator cuff - subacromial impingement	Pain	VAS- rest	Exercise only	Resistance	Resistance	Concentric and eccentric	Concentric and eccentric	21	42.9	11.96	52.38	NA	NA	Unsupervised	Home	Low risk	Low risk	Low risk	Low risk	Low risk	Low risk	Low risk	6	Short	2090	860	0.020800547	0.171443799
2	14. Boudreau et al 2019	RCT	Rotator cuff - subacromial impingement	Pain	VAS- movement	Exercise only	Resistance	Resistance	Concentric and eccentric	Concentric and eccentric	21	42.9	11.96	52.38	NA	NA	Unsupervised	Home	Low risk	Low risk	Low risk	Low risk	Low risk	Low risk	Low risk	3	Short	2091	861	0.871669348	0.2256157
2	14. Boudreau et al 2019	RCT	Rotator cuff - subacromial impingement	Pain	VAS- movement	Exercise only	Resistance	Resistance	Concentric and eccentric	Concentric and eccentric	21	42.9	11.96	52.38	NA	NA	Unsupervised	Home	Low risk	Low risk	Low risk	Low risk	Low risk	Low risk	Low risk	6	Short	2092	862	0.85040912	0.223305635
2	44. Kim et al 2017	RCT	Rotator cuff - subacromial impingement	Pain	NPRS- pain intensity	Exercise only	Proprioception	Proprioception	Movement pattern retraining	Movement pattern retraining	20	51.08	10.62	72.5	NA	NA	Supervised	Clinic	Low risk	Unclear	Unclear	Low risk	Unclear	Low risk	Low risk	5	Short	2093	863	0.824242424	0.226490526
2	44. Kim et al 2017	RCT	Rotator cuff - subacromial impingement	ROM - Shoulder	ROM- flexion	Exercise only	Proprioception	Proprioception	Movement pattern retraining	Movement pattern retraining	20	51.08	10.62	72.5	NA	NA	Supervised	Clinic	Low risk	Unclear	Unclear	Low risk	Unclear	Low risk	Low risk	5	Short	2094	864	0.577684914	0.202287305
2	44. Kim et al 2017	RCT	Rotator cuff - subacromial impingement	Physical function capacity	Strength- scaption	Exercise only	Proprioception	Proprioception	Movement pattern retraining	Movement pattern retraining	20	51.08	10.62	72.5	NA	NA	Supervised	Clinic	Low risk	Unclear	Unclear	Low risk	Unclear	Low risk	Low risk	5	Short	2095	865	0.25060241	0.181069684
2	44. Kim et al 2017	RCT	Rotator cuff - subacromial impingement	Disability	Q-DASH	Exercise only	Proprioception	Proprioception	Movement pattern retraining	Movement pattern retraining	20	51.08	10.62	72.5	NA	NA	Supervised	Clinic	Low risk	Unclear	Unclear	Low risk	Unclear	Low risk	Low risk	5	Short	2096	866	0.623202658	0.20630388
2	90. Simsek et al 2013	RCT	Rotator cuff - subacromial impingement	Pain	VAS- irritation	Multiple exercise types	Resistance	Proprioception, Resistance	Isokinetic	Isokinetic, movement pattern retraining	19	51	18-69	65.8	NA	NA	Supervised	Clinic	Unclear	Unclear	Unclear	Low risk	Unclear	Unclear	Unclear	0.714285714	Short	2097	867	0.196797222	0.183914259
2	90. Simsek et al 2013	RCT	Rotator cuff - subacromial impingement	Pain	VAS- irritation	Multiple exercise types	Resistance	Proprioception, Resistance	Isokinetic	Isokinetic, movement pattern retraining	19	51	18-69	65.8	NA	NA	Supervised	Clinic	Unclear	Unclear	Unclear	Low risk	Unclear	Unclear	Unclear	0.714285714	Short	2097	868	0.196797222	0.183914259
2	90. Simsek et al 2013	RCT	Rotator cuff - subacromial impingement	Pain	VAS- irritation	Multiple exercise types	Resistance	Proprioception, Resistance	Isokinetic	Isokinetic, movement pattern retraining	19	51	18-69	65.8	NA	NA	Supervised	Clinic	Unclear	Unclear	Unclear	Low risk	Unclear	Unclear	Unclear	0.714285714	Short	2097	869	0.196797222	0.183914259
2	90. Simsek et al 2013	RCT	Rotator cuff - subacromial impingement	Pain	VAS- irritation	Multiple exercise types	Resistance	Proprioception, Resistance	Isokinetic	Isokinetic, movement pattern retraining	19	51	18-69	65.8	NA	NA	Supervised	Clinic	Unclear	Unclear	Unclear	Low risk	Unclear	Unclear	Unclear	0.714285714	Short	2097	870	0.196797222	0.183914259
2	90. Simsek et al 2013	RCT	Rotator cuff - subacromial impingement	Pain	VAS- irritation	Multiple exercise types	Resistance	Proprioception, Resistance	Isokinetic	Isokinetic, movement pattern retraining	19	51	18-69	65.8	NA	NA	Supervised	Clinic	Unclear	Unclear	Unclear	Low risk	Unclear	Unclear	Unclear	0.714285714	Short	2097	871	0.196797222	0.183914259
2	90. Simsek et al 2013	RCT	Rotator cuff - subacromial impingement	Pain	VAS- night pain	Multiple exercise types	Resistance	Proprioception, Resistance	Isokinetic	Isokinetic, movement pattern retraining	19	51	18-69	65.8	NA	NA	Supervised	Clinic	Unclear	Unclear	Unclear	Low risk	Unclear	Unclear	Unclear	1.714285714	Short	2098	872	0.606888858	0.210596235
2	90. Simsek et al 2013	RCT	Rotator cuff - subacromial impingement	Disability	Constant score	Multiple exercise types	Resistance	Proprioception, Resistance	Isokinetic	Isokinetic, movement pattern retraining	19	51	18-69	65.8	NA	NA	Supervised	Clinic	Unclear	Unclear	Unclear	Low risk	Unclear	Unclear	Unclear	0.714285714	Short	2099	873	0.392064123	0.193641066
2	90. Simsek et al 2013	RCT	Rotator cuff - subacromial impingement	Disability	Constant score	Multiple exercise types	Resistance	Proprioception, Resistance	Isokinetic	Isokinetic, movement pattern retraining	19	51	18-69	65.8	NA	NA	Supervised	Clinic	Unclear	Unclear	Unclear	Low risk	Unclear	Unclear	Unclear	1.714285714	Short	2099	874	0.595567461	0.209561411
2	90. Simsek et al 2013	RCT	Rotator cuff - subacromial impingement	Disability	DASH	Multiple exercise types	Resistance	Proprioception, Resistance	Isokinetic	Isokinetic, movement pattern retraining	19	51	18-69	65.8	NA	NA	Supervised	Clinic	Unclear	Unclear	Unclear	Low risk	Unclear	Unclear	Unclear	0.714285714	Short	2100	875	0.270642123	0.186887385
2	90. Simsek et al 2013	RCT	Rotator cuff - subacromial impingement	Disability	DASH	Multiple exercise types	Resistance	Proprioception, Resistance	Isokinetic	Isokinetic, movement pattern retraining	19	51	18-69	65.8	NA	NA	Supervised	Clinic	Unclear	Unclear	Unclear	Low risk	Unclear	Unclear	Unclear	1.714285714	Short	2100	876	0.326053765	0.189691574
2	90. Simsek et al 2013	RCT	Rotator cuff - subacromial impingement	ROM - Shoulder	ROM- painfree flexion	Multiple exercise types	Resistance	Proprioception, Resistance	Isokinetic	Isokinetic, movement pattern retraining	19	51	18-69	65.8	NA	NA	Supervised	Clinic	Unclear	Unclear	Unclear	Low risk	Unclear	Unclear	Unclear	0.714285714	Short	2101	877	0.350048342	0.191052396
2	90. Simsek et al 2013	RCT	Rotator cuff - subacromial impingement	ROM - Shoulder	ROM- painfree flexion	Multiple exercise types	Resistance	Proprioception, Resistance	Isokinetic	Isokinetic, movement pattern retraining	19	51	18-69	65.8	NA	NA	Supervised	Clinic	Unclear	Unclear	Unclear	Low risk	Unclear	Unclear	Unclear	1.714285714	Short	2101	878	0.470115685	0.199113336
2	90. Simsek et al 2013	RCT	Rotator cuff - subacromial impingement	ROM - Shoulder	ROM- painfree abduction	Multiple exercise types	Resistance	Proprioception, Resistance	Isokinetic	Isokinetic, movement pattern retraining	19	51	18-69	65.8	NA	NA	Supervised	Clinic	Unclear	Unclear	Unclear	Low risk	Unclear	Unclear	Unclear	0.714285714	Short	2102	879	0.432977613	0.19640505
2	90. Simsek et al 2013	RCT	Rotator cuff - subacromial impingement	ROM - Shoulder	ROM- painfree abduction	Multiple exercise types	Resistance	Proprioception, Resistance	Isokinetic	Isokinetic, movement pattern retraining	19	51	18-69	65.8	NA	NA	Supervised	Clinic	Unclear	Unclear	Unclear	Low risk	Unclear	Unclear	Unclear	1.714285714	Short	2102	880	0.865955225	0.237775562
2	90. Simsek et al 2013	RCT	Rotator cuff - subacromial impingement	ROM - Shoulder	ROM- painfree ext rotation	Multiple exercise types	Resistance	Proprioception, Resistance	Isokinetic	Isokinetic, movement pattern retraining	19	51	18-69	65.8	NA	NA	Supervised	Clinic	Unclear	Unclear	Unclear	Low risk	Unclear	Unclear	Unclear	0.714285714	Short	2103	881	0.144438523	0.18235632
2	90. Simsek et al 2013	RCT	Rotator cuff - subacromial impingement	ROM - Shoulder	ROM- painfree ext rotation	Multiple exercise types	Resistance	Proprioception, Resistance	Isokinetic	Isokinetic, movement pattern retraining	19	51	18-69	65.8	NA	NA	Supervised	Clinic	Unclear	Unclear	Unclear	Low risk	Unclear	Unclear	Unclear	1.714285714	Short	2103	882	0.302337267	0.188432779
2	90. Simsek et al 2013	RCT	Rotator cuff - subacromial impingement	ROM - Shoulder	ROM- painfree int rotation	Multiple exercise types	Resistance	Proprioception, Resistance	Isokinetic	Isokinetic, movement pattern retraining	19	51	18-69	65.8	NA	NA	Supervised	Clinic	Unclear	Unclear	Unclear	Low risk	Unclear	Unclear	Unclear	0.714285714	Short	2104	883	0.147150452	0.182425555
2	90. Simsek et al 2013	RCT	Rotator cuff - subacromial impingement	ROM - Shoulder	ROM- painfree int rotation	Multiple exercise types	Resistance	Proprioception, Resistance	Isokinetic	Isokinetic, movement pattern retraining	19	51	18-69	65.8	NA	NA	Supervised	Clinic	Unclear	Unclear	Unclear	Low risk	Unclear	Unclear	Unclear	1.714285714	Short	2104	884	0.18013245	0.183368038
2	90. Simsek et al 2013	RCT	Rotator cuff - subacromial impingement	ROM - Shoulder	AROM- flexion into pain	Multiple exercise types	Resistance	Proprioception, Resistance	Isokinetic	Isokinetic, movement pattern retraining	19	51	18-69	65.8	NA	NA	Supervised	Clinic	Unclear	Unclear	Unclear	Low risk	Unclear	Unclear	Unclear	0.714285714	Short	2105	885	0.231980116	0.185219495
2	90. Simsek et al 2013	RCT	Rotator cuff - subacromial impingement	ROM - Shoulder	AROM- flexion into pain	Multiple exercise types	Resistance	Proprioception, Resistance	Isokinetic	Isokinetic, movement pattern retraining	19	51	18-69	65.8	NA	NA	Supervised	Clinic	Unclear	Unclear	Unclear	Low risk	Unclear	Unclear	Unclear	1.714285714	Short	2105	886	0.29399929	0.188010926
2	90. Simsek et al 2013	RCT	Rotator cuff - subacromial impingement	ROM - Shoulder	AROM- abduction into pain	Multiple exercise types	Resistance	Proprioception, Resistance	Isokinetic	Isokinetic, movement pattern retraining	19	51	18-69	65.8	NA	NA	Supervised	Clinic	Unclear	Unclear	Unclear	Low risk	Unclear	Unclear	Unclear	0.714285714	Short	2106	887	0.249250873	0.185934682
2	90. Simsek et al 2013	RCT	Rotator cuff - subacromial impingement	ROM - Shoulder	AROM- abduction into pain	Multiple exercise types	Resistance	Proprioception, Resistance	Isokinetic	Isokinetic, movement pattern retraining	19	51	18-69	65.8	NA	NA	Supervised	Clinic	Unclear	Unclear	Unclear	Low risk	Unclear	Unclear	Unclear	1.714285714	Short	2106	888	0.415002703	0.195161808
2	90. Simsek et al 2013	RCT	Rotator cuff - subacromial impingement	ROM - Shoulder	AROM- ext rotation into pain	Multiple exercise types	Resistance	Proprioception, Resistance	Isokinetic	Isokinetic, movement pattern retraining	19	51	18-69	65.8	NA	NA	Supervised	Clinic	Unclear	Unclear	Unclear	Low risk	Unclear	Unclear	Unclear	0.714285714	Short	2107	889	0.258345973	0.186330762
2	90. Simsek et al 2013	RCT	Rotator cuff - subacromial impingement	ROM - Shoulder	AROM- ext rotation into pain	Multiple exercise types	Resistance	Proprioception, Resistance	Isokinetic	Isokinetic, movement pattern retraining	19	51	18-69	65.8	NA	NA	Supervised	Clinic	Unclear	Unclear	Unclear	Low risk	Unclear	Unclear	Unclear	1.714285714	Short	2107	890	0.283885879	0.187513864
2	90. Simsek et al 2013	RCT	Rotator cuff - subacromial impingement	ROM - Shoulder	PROM- flexion into pain	Multiple exercise types	Resistance	Proprioception, Resistance	Isokinetic	Isokinetic, movement pattern retraining	19	51	18-69	65.8	NA	NA	Supervised	Clinic	Unclear	Unclear	Unclear	Low risk	Unclear	Unclear	Unclear	1.714285714	Short	2109	891	0.252392108	0.186069969
2	90. Simsek et al 2013	RCT	Rotator cuff - subacromial impingement	ROM - Shoulder	PROM- flexion into pain	Multiple exercise types	Resistance	Proprioception, Resistance	Isokinetic	Isokinetic, movement pattern retraining	19	51	18-69	65.8	NA	NA	Supervised	Clinic	Unclear	Unclear	Unclear	Low risk	Unclear	Unclear	Unclear	0.714285714	Short	2109	892	0.30229473	0.188430599
2	90. Simsek et al 2013	RCT	Rotator cuff - subacromial impingement	ROM - Shoulder	PROM- abduction into pain	Multiple exercise types	Resistance	Proprioception, Resistance	Isokinetic	Isokinetic, movement pattern retraining	19	51	18-69	65.8	NA	NA	Supervised	Clinic	Unclear	Unclear	Unclear	Low risk	Unclear	Unclear	Unclear	1.714285714	Short	2110	893	0.251116455	0.186014837
2	90. Simsek et al 2013	RCT	Rotator cuff - subacromial impingement	ROM - Shoulder	PROM- abduction into pain	Multiple exercise types	Resistance	Proprioception, Resistance	Isokinetic	Isokinetic, movement pattern retraining	19	51	18-69	65.8	NA	NA	Supervised	Clinic	Unclear	Unclear	Unclear	Low risk	Unclear	Unclear	Unclear	0.714285714	Short	2110	894	0.281776022	0.187412199
2	90. Simsek et al 2013	RCT	Rotator cuff - subacromial impingement	Physical function capacity	Dynamometer- flexion	Multiple exercise types	Resistance	Proprioception, Resistance	Isokinetic	Isokinetic, movement pattern retraining	19	51	18-69	65.8	NA	NA	Supervised	Clinic	Unclear	Unclear	Unclear	Low risk	Unclear	Unclear	Unclear	0.714285714	Short	2113	895	0.269745053	0.186845959
2	90. Simsek et al 2013	RCT	Rotator cuff - subacromial impingement	Physical function capacity	Dynamometer- flexion	Multiple exercise types	Resistance	Proprioception, Resistance	Isokinetic	Isokinetic, movement pattern retraining	19	51	18-69	65.8	NA	NA	Supervised	Clinic	Unclear	Unclear	Unclear	Low risk	Unclear	Unclear	Unclear	1.714285714	Short	2113	896	0.269745053	0.186845959
2	90. Simsek et al 2013	RCT	Rotator cuff - subacromial impingement	Physical function capacity	Dynamometer- extension	Multiple exercise types	Resistance	Proprioception, Resistance	Isokinetic	Isokinetic, movement pattern retraining	19	51	18-69	65.8	NA	NA	Supervised	Clinic	Unclear	Unclear	Unclear	Low risk	Unclear	Unclear	Unclear	0.714285714	Short	2114	897	0.152893263	0.182576328
2	90. Simsek et al 2013	RCT	Rotator cuff - subacromial impingement	Physical function capacity	Dynamometer- extension	Multiple exercise types	Resistance	Proprioception, Resistance	Isokinetic	Isokinetic, movement pattern retraining	19	51	18-69	65.8	NA	NA	Supervised	Clinic	Unclear	Unclear	Unclear	Low risk	Unclear	Unclear	Unclear	1.714285714	Short	2114	898	0.181741049	0.183418725
2	90. Simsek et al 2013	RCT	Rotator cuff - subacromial impingement	Physical function capacity	Dynamometer- abduction	Multiple exercise types	Resistance	Proprioception, Resistance	Isokinetic	Isokinetic, movement pattern retraining	19	51	18-69	65.8	NA	NA	Supervised	Clinic	Unclear	Unclear	Unclear	Low risk	Unclear	Unclear	Unclear	0.714285714	Short	2115	899	0.245793344	0.18578762
2	90. Simsek et al 2013	RCT	Rotator cuff - subacromial impingement	Physical function capacity	Dynamometer- abduction	Multiple exercise types	Resistance	Proprioception, Resistance	Isokinetic	Isokinetic, movement pattern retraining	19	51	18-69	65.8	NA	NA	Supervised	Clinic	Unclear	Unclear	Unclear	Low risk	Unclear	Unclear	Unclear	1.714285714	Short	2115	900	0.334787486	0.190176832
2	90. Simsek et al 2013	RCT	Rotator cuff - subacromial impingement	Physical function capacity	Dynamometer- ext rotation	Multiple exercise types	Resistance	Proprioception, Resistance	Isokinetic	Isokinetic, movement pattern retraining	19	51	18-69	65.8	NA	NA	Supervised	Clinic	Unclear	Unclear	Unclear	Low risk	Unclear	Unclear	Unclear	0.714285714	Short	2116	901	0.151223128	0.182531898
2	90. Simsek et al 2013	RCT	Rotator cuff - subacromial impingement	Physical function capacity	Dynamometer- ext rotation	Multiple exercise types	Resistance	Proprioception, Resistance	Isokinetic	Isokinetic, movement pattern retraining	19	51	18-69	65.8	NA	NA	Supervised	Clinic	Unclear	Unclear	Unclear	Low risk	Unclear	Unclear	Unclear	1.714285714	Short	2116	902	0.151223128	0.182531898
2	90. Simsek et al 2013	RCT	Rotator cuff - subacromial impingement	Physical function capacity	Dynamometer- int rotation	Multiple exercise types	Resistance	Proprioception, Resistance	Isokinetic	Isokinetic, movement pattern retraining	19	51	18-69	65.8	NA	NA	Supervised	Clinic	Unclear	Unclear	Unclear	Low risk	Unclear	Unclear	Unclear	0.714285714	Short	2117	903	0.325764108	0.189675679
2	90. Simsek et al 2013	RCT	Rotator cuff - subacromial impingement	Physical function capacity	Dynamometer- int rotation	Multiple exercise types	Resistance	Proprioception, Resistance	Isokinetic	Isokinetic, movement pattern retraining	19	51	18-69	65.8	NA	NA	Supervised	Clinic	Unclear	Unclear	Unclear	Low risk	Unclear	Unclear	Unclear	1.714285714	Short	2117	904	0.342052314	0.190589273
2	102. vanArk et al 2016	RCT	Patellar	Pain	NRS- pain SLDS activity	Exercise only	Resistance	Resistance	Concentric and eccentric	Concentric and eccentric	11	23	4.7	6.9	24	3	Unsupervised	Fitness Facility	Low risk	Low risk	Low risk	Unclear	Unclear	Low risk	Low risk	4	Short	2118	905	1.904395708	0.542360254
2	102. vanArk et al 2016	RCT	Patellar	Disability	VISA-P	Exercise only	Resistance	Resistance	Concentric and eccentric	Concentric and eccentric	10	23	4.7	6.9	24	3	Unsupervised	Fitness Facility	Low risk	Low risk	Low risk	Unclear	Unclear	Low risk	Low risk	4	Short	2119	906	0.485559051	0.286547159
2	51. Kromer et al 2013	RCT	Rotator cuff - subacromial impingement	Disability	SPADI	Multiple exercise types	Resistance	Flexibility, Proprioception, Resistance	Concentric and eccentric	concentric and eccentric, static, dynamic, movement pattern retraining	44	51.8	11.2	51.1	26	4.1	Unsupervised	Home	Low risk	Low risk	Low risk	Low risk	Low risk	Low risk	Low risk	5	Short	2120	907	0.837977296	0.149813445
2	51. Kromer et al 2013	RCT	Rotator cuff - subacromial impingement	Disability	SPADI	Multiple exercise types	Resistance	Flexibility, Proprioception, Resistance	Concentric and eccentric	concentric and eccentric, static, dynamic, movement pattern retraining	44	51.8	11.2	51.1	26	4.1	Unsupervised	Home	Low risk	Low risk	Low risk	Low risk	Low risk	Low risk	Low risk	12	Short	2120	908	1.24251806	0.181106732
2	51. Kromer et al 2013	RCT	Rotator cuff - subacromial impingement	Disability	SPADI- pain	Multiple exercise types	Resistance	Flexibility, Proprioception, Resistance	Concentric and eccentric	concentric and eccentric, static, dynamic, movement pattern retraining	44	51.8	11.2	51.1	26	4.1	Unsupervised	Home	Low risk	Low risk	Low risk	Low risk	Low risk	Low risk	Low risk	5	Short	2121	909	1.027887638	0.163719104
2	51. Kromer et al 2013	RCT	Rotator cuff - subacromial impingement	Disability	SPADI- pain	Multiple exercise types	Resistance	Flexibility, Proprioception, Resistance	Concentric and eccentric	concentric and eccentric, static, dynamic, movement pattern retraining	44	51.8	11.2	51.1	26	4.1	Unsupervised	Home	Low risk	Low risk	Low risk	Low risk	Low risk	Low risk	Low risk	12	Short	2121	910	1.448128993	0.199013899
2	51. Kromer et al 2013	RCT	Rotator cuff - subacromial impingement	Function	SPADI- function	Multiple exercise types	Resistance	Flexibility, Proprioception, Resistance	Concentric and eccentric	concentric and eccentric, static, dynamic, movement pattern retraining	44	51.8	11.2	51.1	26	4.1	Unsupervised	Home	Low risk	Low risk	Low risk	Low risk	Low risk	Low risk	Low risk	5	Short	2122	911	0.549768203	0.13237432
2	51. Kromer et al 2013	RCT	Rotator cuff - subacromial impingement	Function	SPADI- function	Multiple exercise types	Resistance	Flexibility, Proprioception, Resistance	Concentric and eccentric	concentric and eccentric, static, dynamic, movement pattern retraining	44	51.8	11.2	51.1	26	4.1	Unsupervised	Home	Low risk	Low risk	Low risk	Low risk	Low risk	Low risk	Low risk	12	Short	2122	912	0.88573766	0.15315677
2	51. Kromer et al 2013	RCT	Rotator cuff - subacromial impingement	Pain	VAS- pain	Multiple exercise types	Resistance	Flexibility, Proprioception, Resistance	Concentric and eccentric	concentric and eccentric, static, dynamic, movement pattern retraining	44	51.8	11.2	51.1	26	4.1	Unsupervised	Home	Low risk	Low risk	Low risk	Low risk	Low risk	Low risk	Low risk	5	Short	2123	913	0.927875244	0.156196291
2	51. Kromer et al 2013	RCT	Rotator cuff - subacromial impingement	Pain	VAS- pain	Multiple exercise types	Resistance	Flexibility, Proprioception, Resistance	Concentric and eccentric	concentric and eccentric, static, dynamic, movement pattern retraining	44	51.8	11.2	51.1	26	4.1	Unsupervised	Home	Low risk	Low risk	Low risk	Low risk	Low risk	Low risk	Low risk	12	Short	2123	914	1.473684211	0.201308817
2	51. Kromer et al 2013	RCT	Rotator cuff - subacromial impingement	Function	GPSS	Multiple exercise types	Resistance	Flexibility, Proprioception, Resistance	Concentric and eccentric	concentric and eccentric, static, dynamic, movement pattern retraining	44	51.8	11.2	51.1	26	4.1	Unsupervised	Home	Low risk	Low risk	Low risk	Low risk	Low risk	Low risk	Low risk	5	Short	2124	915	1.329205366	0.188527569
2	51. Kromer et al 2013	RCT	Rotator cuff - subacromial impingement	Function	GPSS	Multiple exercise types	Resistance	Flexibility, Proprioception, Resistance	Concentric and eccentric	concentric and eccentric, static, dynamic, movement pattern retraining	44	51.8	11.2	51.1	26	4.1	Unsupervised	Home	Low risk	Low risk	Low risk	Low risk	Low risk	Low risk	Low risk	12	Short	2124	916	1.964912281	0.247605156
2	59. Marzetti et al 2014	RCT	Rotator cuff - subacromial impingement	Disability	Quick DASH	Exercise only	Proprioception	Proprioception	Joint position sense	joint position sense, movement pattern retraining, dynamic	24	62.1	12.5	61.4	NR	NA	Supervised	Clinic	Low risk	Low risk	Low risk	Low risk	Low risk	Low risk	Low risk	5	Short	2125	917	0.679943307	0.191834534
2	59. Marzetti et al 2014	RCT	Rotator cuff - subacromial impingement	Disability	Quick DASH	Exercise only	Proprioception	Proprioception	Joint position sense	joint position sense, movement pattern retraining, dynamic	24	62.1	12.5	61.4	NR	NA	Supervised	Clinic	Low risk	Low risk	Low risk	Low risk	Low risk	Low risk	Low risk	12	Short	2125	918	0.823317934	0.204986634
2	59. Marzetti et al 2014	RCT	Rotator cuff - subacromial impingement	Disability	Quick DASH	Exercise only	Proprioception	Proprioception	Joint position sense	joint position sense, movement pattern retraining, dynamic	24	62.1	12.5	61.4	NR	NA	Supervised	Clinic	Low risk	Low risk	Low risk	Low risk	Low risk	Low risk	Low risk	24	Medium	2125	919	0.941710618	0.216978404
2	59. Marzetti et al 2014	RCT	Rotator cuff - subacromial impingement	Disability	Constant-murley score	Exercise only	Proprioception	Proprioception	Joint position sense	joint position sense, movement pattern retraining, dynamic	24	62.1	12.5	61.4	NR	NA	Supervised	Clinic	Low risk	Low risk	Low risk	Low risk	Low risk	Low risk	Low risk	5	Short	2126	920	0.539017897	0.18066761
2	59. Marzetti et al 2014	RCT	Rotator cuff - subacromial impingement	Disability	Constant-murley score	Exercise only	Proprioception	Proprioception	Joint position sense	joint position sense, movement pattern retraining, dynamic	24	62.1	12.5	61.4	NR	NA	Supervised	Clinic	Low risk	Low risk	Low risk	Low risk	Low risk	Low risk	Low risk	12	Short	2126	921	0.825176047	0.205167474
2	59. Marzetti et al 2014	RCT	Rotator cuff - subacromial impingement	Disability	Constant-murley score	Exercise only	Proprioception	Proprioception	Joint position sense	joint position sense, movement pattern retraining, dynamic	24	62.1	12.5	61.4	NR	NA	Supervised	Clinic	Low risk	Low risk	Low risk	Low risk	Low risk	Low risk	Low risk	24	Medium	2126	922	0.94328132	0.217143552
2	59. Marzetti et al 2014	RCT	Rotator cuff - subacromial impingement	Pain	VAS- rest	Exercise only	Proprioception	Proprioception	Joint position sense	joint position sense, movement pattern retraining, dynamic	24	62.1	12.5	61.4	NR	NA	Supervised	Clinic	Low risk	Low risk	Low risk	Low risk	Low risk	Low risk	Low risk	5	Short	2127	923	1.028762973	0.226347785
2	59. Marzetti et al 2014	RCT	Rotator cuff - subacromial impingement	Pain	VAS- rest	Exercise only	Proprioception	Proprioception	Joint position sense	joint position sense, movement pattern retraining, dynamic	24	62.1	12.5	61.4	NR	NA	Supervised	Clinic	Low risk	Low risk	Low risk	Low risk	Low risk	Low risk	Low risk	12	Short	2127	924	1.21901366	0.248170539
2	59. Marzetti et al 2014	RCT	Rotator cuff - subacromial impingement	Pain	VAS- rest	Exercise only	Proprioception	Proprioception	Joint position sense	joint position sense, movement pattern retraining, dynamic	24	62.1	12.5	61.4	NR	NA	Supervised	Clinic	Low risk	Low risk	Low risk	Low risk	Low risk	Low risk	Low risk	24	Medium	2127	925	1.38107906	0.267941085
2	59. Marzetti et al 2014	RCT	Rotator cuff - subacromial impingement	Pain	VAS- movement	Exercise only	Proprioception	Proprioception	Joint position sense	joint position sense, movement pattern retraining, dynamic	24	62.1	12.5	61.4	NR	NA	Supervised	Clinic	Low risk	Low risk	Low risk	Low risk	Low risk	Low risk	Low risk	5	Short	2128	926	0.406610819	0.172072322
2	59. Marzetti et al 2014	RCT	Rotator cuff - subacromial impingement	Pain	VAS- movement	Exercise only	Proprioception	Proprioception	Joint position sense	joint position sense, movement pattern retraining, dynamic	24	62.1	12.5	61.4	NR	NA	Supervised	Clinic	Low risk	Low risk	Low risk	Low risk	Low risk	Low risk	Low risk	12	Short	2128	927	0.933545247	0.216122291
2	59. Marzetti et al 2014	RCT	Rotator cuff - subacromial impingement	Pain	VAS- movement	Exercise only	Proprioception	Proprioception	Joint position sense	joint position sense, movement pattern retraining, dynamic	24	62.1	12.5	61.4	NR	NA	Supervised	Clinic	Low risk	Low risk	Low risk	Low risk	Low risk	Low risk	Low risk	24	Medium	2128	928	1.182490646	0.243853893
2	59. Marzetti et al 2014	RCT	Rotator cuff - subacromial impingement	Disability	ASES	Exercise only	Proprioception	Proprioception	Joint position sense	joint position sense, movement pattern retraining, dynamic	24	62.1	12.5	61.4	NR	NA	Supervised	Clinic	Low risk	Low risk	Low risk	Low risk	Low risk	Low risk	Low risk	5	Short	2129	929	1.026480105	0.226096676
2	59. Marzetti et al 2014	RCT	Rotator cuff - subacromial impingement	Disability	ASES	Exercise only	Proprioception	Proprioception	Joint position sense	joint position sense, movement pattern retraining, dynamic	24	62.1	12.5	61.4	NR	NA	Supervised	Clinic	Low risk	Low risk	Low risk	Low risk	Low risk	Low risk	Low risk	12	Short	2129	930	1.361727816	0.265531874
2	59. Marzetti et al 2014	RCT	Rotator cuff - subacromial impingement	Disability	ASES	Exercise only	Proprioception	Proprioception	Joint position sense	joint position sense, movement pattern retraining, dynamic	24	62.1	12.5	61.4	NR	NA	Supervised	Clinic	Low risk	Low risk	Low risk	Low risk	Low risk	Low risk	Low risk	24	Medium	2129	931	1.510918808	0.284402954
2	101. Valles-Carrascosa et al 2018	RCT	Rotator cuff - subacromial impingement	Pain	VAS- activity	Multiple exercise types	Resistance	Flexibility, Resistance	Eccentric only	eccentric only, static	11	59	48.50, 70	54	26.69	NA	Supervised	NA	Low risk	Low risk	Low risk	High risk	Low risk	Low risk	High risk	4	Short	2130	932	0.794945244	0.315004453
2	101. Valles-Carrascosa et al 2018	RCT	Rotator cuff - subacromial impingement	ROM - Shoulder	ROM- flexion	Multiple exercise types	Resistance	Flexibility, Resistance	Eccentric only	eccentric only, static	11	59	48.50, 70	54	26.69	NA	Supervised	NA	Low risk	Low risk	Low risk	High risk	Low risk	Low risk	High risk	4	Short	2131	933	1.723026502	0.501330805
2	101. Valles-Carrascosa et al 2018	RCT	Rotator cuff - subacromial impingement	ROM - Shoulder	ROM- extension	Multiple exercise types	Resistance	Flexibility, Resistance	Eccentric only	eccentric only, static	11	59	48.50, 70	54	26.69	NA	Supervised	NA	Low risk	Low risk	Low risk	High risk	Low risk	Low risk	High risk	4	Short	2132	934	1.088226119	0.367663169
2	101. Valles-Carrascosa et al 2018	RCT	Rotator cuff - subacromial impingement	ROM - Shoulder	ROM- abduction	Multiple exercise types	Resistance	Flexibility, Resistance	Eccentric only	eccentric only, static	11	59	48.50, 70	54	26.69	NA	Supervised	NA	Low risk	Low risk	Low risk	High risk	Low risk	Low risk	High risk	4	Short	2133	935	0.507839654	0.273646146
2	101. Valles-Carrascosa et al 2018	RCT	Rotator cuff - subacromial impingement	ROM - Shoulder	ROM- ext rotation	Multiple exercise types	Resistance	Flexibility, Resistance	Eccentric only	eccentric only, static	11	59	48.50, 70	54	26.69	NA	Supervised	NA	Low risk	Low risk	Low risk	High risk	Low risk	Low risk	High risk	4	Short	2135	936	1.026041769	0.355835218
2	101. Valles-Carrascosa et al 2018	RCT	Rotator cuff - subacromial impingement	ROM - Shoulder	ROM- int rotation	Multiple exercise types	Resistance	Flexibility, Resistance	Eccentric only	eccentric only, static	11	59	48.50, 70	54	26.69	NA	Supervised	NA	Low risk	Low risk	Low risk	High risk	Low risk	Low risk	High risk	4	Short	2136	937	2.28527485	0.630888705
2	101. Valles-Carrascosa et al 2018	RCT	Rotator cuff - subacromial impingement	Disability	Constant-murley score	Multiple exercise types	Resistance	Flexibility, Resistance	Eccentric only	eccentric only, static	11	59	48.50, 70	54	26.69	NA	Supervised	NA	Low risk	Low risk	Low risk	High risk	Low risk	Low risk	High risk	4	Short	2137	938	1.059206611	0.362105014
2	70. Pearson et al 2018	RCT	Patellar	Pain	Change in pain with SLDS	Exercise only	Resistance	Resistance	Isometric	Isometric	8	28	4.25	0	NA	NA	Unsupervised	Home	Low risk	Low risk	High risk	Low risk	Low risk	Low risk	High risk	4	Short	2138	939	0.364199624	0.311521867
2	70. Pearson et al 2018	RCT	Patellar	Pain	Change in pain with SL hop	Exercise only	Resistance	Resistance	Isometric	Isometric	8	28	4.25	0	NA	NA	Unsupervised	Home	Low risk	Low risk	High risk	Low risk	Low risk	Low risk	High risk	4	Short	2139	940	0.658495014	0.359167331
2	66. Osteras et al 2010	RCT	Rotator cuff - subacromial impingement	Pain	VAS- rest	Multiple exercise types	Resistance	Flexibility, Resistance	Concentric and eccentric	Concentric and eccentric, Isokinetic, Dynamic,	30	43.99	13	20.5	25.85	4.19	Supervised	Fitness Facility	Low risk	Low risk	High risk	High risk	Low risk	Unclear	High risk	13.03572857	Medium	2140	941	1.025171625	0.200245707
2	66. Osteras et al 2010	RCT	Rotator cuff - subacromial impingement	Pain	VAS- rest	Multiple exercise types	Resistance	Flexibility, Resistance	Concentric and eccentric	Concentric and eccentric, Isokinetic, Dynamic,	30	43.99	13	20.5	25.85	4.19	Supervised	Fitness Facility	Low risk	Low risk	High risk	High risk	Low risk	Unclear	High risk	39.10718571	Medium	2140	942	0.973913043	0.195385131
2	66. Osteras et al 2010	RCT	Rotator cuff - subacromial impingement	Pain	VAS- rest	Multiple exercise types	Resistance	Flexibility, Resistance	Concentric and eccentric	Concentric and eccentric, Isokinetic, Dynamic,	30	43.99	13	20.5	25.85	4.19	Supervised	Fitness Facility	Low risk	Low risk	High risk	High risk	Low risk	Unclear	High risk	65.17864286	Long	2140	943	0.973913043	0.195385131
2	66. Osteras et al 2010	RCT	Rotator cuff - subacromial impingement	Disability	SRQ	Multiple exercise types	Resistance	Flexibility, Resistance	Concentric and eccentric	Concentric and eccentric, Isokinetic, Dynamic,	30	43.99	13	20.5	25.85	4.19	Supervised	Fitness Facility	Low risk	Low risk	High risk	High risk	Low risk	Unclear	High risk	13.03572857	Medium	2141	944	0.563844394	0.162300769
2	66. Osteras et al 2010	RCT	Rotator cuff - subacromial impingement	Disability	SRQ	Multiple exercise types	Resistance	Flexibility, Resistance	Concentric and eccentric	Concentric and eccentric, Isokinetic, Dynamic,	30	43.99	13	20.5	25.85	4.19	Supervised	Fitness Facility	Low risk	Low risk	High risk	High risk	Low risk	Unclear	High risk	39.10718571	Medium	2141	945	0.915331808	0.189995776
2	66. Osteras et al 2010	RCT	Rotator cuff - subacromial impingement	Disability	SRQ	Multiple exercise types	Resistance	Flexibility, Resistance	Concentric and eccentric	Concentric and eccentric, Isokinetic, Dynamic,	30	43.99	13	20.5	25.85	4.19	Supervised	Fitness Facility	Low risk	Low risk	High risk	High risk	Low risk	Unclear	High risk	65.17864286	Long	2141	946	0.798169336	0.179807943
2	12. Beyer et al 2015	RCT	Achilles	Pain	VAS- running	Exercise only	Resistance	Resistance	Concentric and eccentric	Concentric and eccentric	28	48	1.98	31.9	25.47	1.11	Unsupervised	Fitness Facility	Low risk	Low risk	Low risk	Low risk	Low risk	Low risk	High risk	12	Short	2142	947	1.258573288	0.232379043
2	12. Beyer et al 2015	RCT	Achilles	Pain	VAS- running	Exercise only	Resistance	Resistance	Concentric and eccentric	Concentric and eccentric	28	48	1.98	31.9	25.47	1.11	Unsupervised	Fitness Facility	Low risk	Low risk	Low risk	Low risk	Low risk	Low risk	High risk	52	Medium	2142	948	1.66675922	0.279688731
2	12. Beyer et al 2015	RCT	Achilles	Pain	VAS- heel raise	Exercise only	Resistance	Resistance	Concentric and eccentric	Concentric and eccentric	28	48	1.98	31.9	25.47	1.11	Unsupervised	Fitness Facility	Low risk	Low risk	Low risk	Low risk	Low risk	Low risk	High risk	12	Short	2143	949	0.734734677	0.18115082
2	12. Beyer et al 2015	RCT	Achilles	Pain	VAS- heel raise	Exercise only	Resistance	Resistance	Concentric and eccentric	Concentric and eccentric	28	48	1.98	31.9	25.47	1.11	Unsupervised	Fitness Facility	Low risk	Low risk	Low risk	Low risk	Low risk	Low risk	High risk	52	Medium	2143	950	0.801528738	0.186808623
2	12. Beyer et al 2015	RCT	Achilles	Disability	VISA-A	Exercise only	Resistance	Resistance	Concentric and eccentric	Concentric and eccentric	28	48	1.98	31.9	25.47	1.11	Unsupervised	Fitness Facility	Low risk	Low risk	Low risk	Low risk	Low risk	Low risk	High risk	12	Short	2145	951	1.262825225	0.232846572
2	12. Beyer et al 2015	RCT	Achilles	Disability	VISA-A	Exercise only	Resistance	Resistance	Concentric and eccentric	Concentric and eccentric	28	48	1.98	31.9	25.47	1.11	Unsupervised	Fitness Facility	Low risk	Low risk	Low risk	Low risk	Low risk	Low risk	High risk	52	Medium	2145	952	2.009040131	0.322104874
2	63. Nishizuka et al 2017	RCT	Lateral elbow/tennis elbow	Disability	Hand10	Exercise only	Flexibility	Flexibility	Static	Static	55	53.6	11.8	39.1	NA	NA	Unsupervised	Home	Low risk	Low risk	High risk	Unclear	Low risk	Unclear	High risk	4.345242857	Short	2146	953	0.168598626	0.106254335
2	63. Nishizuka et al 2017	RCT	Lateral elbow/tennis elbow	Disability	Hand10	Exercise only	Flexibility	Flexibility	Static	Static	55	53.6	11.8	39.1	NA	NA	Unsupervised	Home	Low risk	Low risk	High risk	Unclear	Low risk	Unclear	High risk	13.03572857	Medium	2146	954	0.536450175	0.117479388
2	63. Nishizuka et al 2017	RCT	Lateral elbow/tennis elbow	Disability	Hand10	Exercise only	Flexibility	Flexibility	Static	Static	55	53.6	11.8	39.1	NA	NA	Unsupervised	Home	Low risk	Low risk	High risk	Unclear	Low risk	Unclear	High risk	26.07145714	Medium	2146	955	1.221062779	0.159538802
2	63. Nishizuka et al 2017	RCT	Lateral elbow/tennis elbow	Disability	Hand10	Exercise only	Flexibility	Flexibility	Static	Static	55	53.6	11.8	39.1	NA	NA	Unsupervised	Home	Low risk	Low risk	High risk	Unclear	Low risk	Unclear	High risk	52.14291429	Medium	2146	956	1.267044222	0.162973852
2	63. Nishizuka et al 2017	RCT	Lateral elbow/tennis elbow	Pain	NPRS- pain	Exercise only	Flexibility	Flexibility	Static	Static	55	53.6	11.8	39.1	NA	NA	Unsupervised	Home	Low risk	Low risk	High risk	Unclear	Low risk	Unclear	High risk	4.345242857	Short	2147	957	0.493023256	0.115622195
2	63. Nishizuka et al 2017	RCT	Lateral elbow/tennis elbow	Pain	NPRS- pain	Exercise only	Flexibility	Flexibility	Static	Static	55	53.6	11.8	39.1	NA	NA	Unsupervised	Home	Low risk	Low risk	High risk	Unclear	Low risk	Unclear	High risk	13.03572857	Medium	2147	958	0.851585624	0.134302325
2	63. Nishizuka et al 2017	RCT	Lateral elbow/tennis elbow	Pain	NPRS- pain	Exercise only	Flexibility	Flexibility	Static	Static	55	53.6	11.8	39.1	NA	NA	Unsupervised	Home	Low risk	Low risk	High risk	Unclear	Low risk	Unclear	High risk	26.07145714	Medium	2147	959	1.658350951	0.194024043
2	63. Nishizuka et al 2017	RCT	Lateral elbow/tennis elbow	Pain	NPRS- pain	Exercise only	Flexibility	Flexibility	Static	Static	55	53.6	11.8	39.1	NA	NA	Unsupervised	Home	Low risk	Low risk	High risk	Unclear	Low risk	Unclear	High risk	52.14291429	Medium	2147	960	2.106553911	0.232347818
2	28. Dupuis et al 2018	RCT	Rotator cuff - subacromial impingement	Disability	DASH	Multiple exercise types	Resistance	Flexibility, Resistance	Isometric	Isometric, concentric only, static	20	33.3	11.7	55.8	NA	NA	Unsupervised	Home	Low risk	Low risk	High risk	Low risk	Low risk	Low risk	High risk	2	Short	2148	961	0.99047619	0.245672713
2	28. Dupuis et al 2018	RCT	Rotator cuff - subacromial impingement	Disability	DASH	Multiple exercise types	Resistance	Flexibility, Resistance	Isometric	Isometric, concentric only, static	20	33.3	11.7	55.8	NA	NA	Unsupervised	Home	Low risk	Low risk	High risk	Low risk	Low risk	Low risk	High risk	6	Short	2148	962	0.99047619	0.245672713
2	28. Dupuis et al 2018	RCT	Rotator cuff - subacromial impingement	Disability	WORC	Multiple exercise types	Resistance	Flexibility, Resistance	Isometric	Isometric, concentric only, static	20	33.3	11.7	55.8	NA	NA	Unsupervised	Home	Low risk	Low risk	High risk	Low risk	Low risk	Low risk	High risk	2	Short	2149	963	1.138285714	0.264200726
2	28. Dupuis et al 2018	RCT	Rotator cuff - subacromial impingement	Disability	WORC	Multiple exercise types	Resistance	Flexibility, Resistance	Isometric	Isometric, concentric only, static	20	33.3	11.7	55.8	NA	NA	Unsupervised	Home	Low risk	Low risk	High risk	Low risk	Low risk	Low risk	High risk	6	Short	2149	964	1.261714286	0.280527808
2	28. Dupuis et al 2018	RCT	Rotator cuff - subacromial impingement	Disability	BPI	Multiple exercise types	Resistance	Flexibility, Resistance	Isometric	Isometric, concentric only, static	20	33.3	11.7	55.8	NA	NA	Unsupervised	Home	Low risk	Low risk	High risk	Low risk	Low risk	Low risk	High risk	2	Short	2150	965	0.707368421	0.214297881
2	28. Dupuis et al 2018	RCT	Rotator cuff - subacromial impingement	Disability	BPI	Multiple exercise types	Resistance	Flexibility, Resistance	Isometric	Isometric, concentric only, static	20	33.3	11.7	55.8	NA	NA	Unsupervised	Home	Low risk	Low risk	High risk	Low risk	Low risk	Low risk	High risk	6	Short	2150	966	0.808421053	0.224771932
2	28. Dupuis et al 2018	RCT	Rotator cuff - subacromial impingement	Physical function capacity	Strength- abduction	Multiple exercise types	Resistance	Flexibility, Resistance	Isometric	Isometric, concentric only, static	20	33.3	11.7	55.8	NA	NA	Unsupervised	Home	Low risk	Low risk	High risk	Low risk	Low risk	Low risk	High risk	2	Short	2151	967	0.013753582	0.175802119
2	28. Dupuis et al 2018	RCT	Rotator cuff - subacromial impingement	Physical function capacity	Strength- ext rotation	Multiple exercise types	Resistance	Flexibility, Resistance	Isometric	Isometric, concentric only, static	20	33.3	11.7	55.8	NA	NA	Unsupervised	Home	Low risk	Low risk	High risk	Low risk	Low risk	Low risk	High risk	2	Short	2152	968	0.227096774	0.180136359
2	28. Dupuis et al 2018	RCT	Rotator cuff - subacromial impingement	ROM - Shoulder	ROM- flexion	Multiple exercise types	Resistance	Flexibility, Resistance	Isometric	Isometric, concentric only, static	20	33.3	11.7	55.8	NA	NA	Unsupervised	Home	Low risk	Low risk	High risk	Low risk	Low risk	Low risk	High risk	2	Short	2153	969	0.184954128	0.178683384
2	28. Dupuis et al 2018	RCT	Rotator cuff - subacromial impingement	ROM - Shoulder	ROM- ext rotation	Multiple exercise types	Resistance	Flexibility, Resistance	Isometric	Isometric, concentric only, static	20	33.3	11.7	55.8	NA	NA	Unsupervised	Home	Low risk	Low risk	High risk	Low risk	Low risk	Low risk	High risk	2	Short	2154	970	-0.108679245	0.176791739
2	28. Dupuis et al 2018	RCT	Rotator cuff - subacromial impingement	ROM - Shoulder	ROM- ext rotation 90	Multiple exercise types	Resistance	Flexibility, Resistance	Isometric	Isometric, concentric only, static	20	33.3	11.7	55.8	NA	NA	Unsupervised	Home	Low risk	Low risk	High risk	Low risk	Low risk	Low risk	High risk	2	Short	2155	971	0.169411765	0.178220065
2	28. Dupuis et al 2018	RCT	Rotator cuff - subacromial impingement	ROM - Shoulder	ROM- int rotation 90	Multiple exercise types	Resistance	Flexibility, Resistance	Isometric	Isometric, concentric only, static	20	33.3	11.7	55.8	NA	NA	Unsupervised	Home	Unclear	Unclear	Unclear	Unclear	Low risk	Unclear	Unclear	2	Short	2156	972	-0.107294118	0.176766336
2	41. Juul-Kristensen et al 2019	RCT	Rotator cuff - subacromial impingement	Pain	NPRS- pain past 7 days	Multiple exercise types	Proprioception	Flexibility, Proprioception, Resistance	Movement pattern retraining	Movement pattern retraining, static, concentric and eccentric	23	42.9	12.4	51	25.3	3.9	Unsupervised	Home	Low risk	Low risk	Low risk	Low risk	Low risk	Unclear	Low risk	8	Short	2157	973	0.937931034	0.22166617
2	41. Juul-Kristensen et al 2019	RCT	Rotator cuff - subacromial impingement	Pain	NPRS- current pain	Multiple exercise types	Proprioception	Flexibility, Proprioception, Resistance	Movement pattern retraining	Movement pattern retraining, static, concentric and eccentric	23	42.9	12.4	51	25.3	3.9	Unsupervised	Home	Low risk	Low risk	Low risk	Low risk	Low risk	Unclear	Low risk	8	Short	2158	974	0.537931034	0.184699856
2	41. Juul-Kristensen et al 2019	RCT	Rotator cuff - subacromial impingement	Pain	NPRS- pain past 24h	Multiple exercise types	Proprioception	Flexibility, Proprioception, Resistance	Movement pattern retraining	Movement pattern retraining, static, concentric and eccentric	23	42.9	12.4	51	25.3	3.9	Unsupervised	Home	Low risk	Low risk	Low risk	Low risk	Low risk	Unclear	Low risk	8	Short	2159	975	0.419790105	0.176734076
2	41. Juul-Kristensen et al 2019	RCT	Rotator cuff - subacromial impingement	Disability	DASH total	Multiple exercise types	Proprioception	Flexibility, Proprioception, Resistance	Movement pattern retraining	Movement pattern retraining, static, concentric and eccentric	23	42.9	12.4	51	25.3	3.9	Unsupervised	Home	Low risk	Low risk	Low risk	Low risk	Low risk	Unclear	Low risk	8	Short	2160	976	0.543340095	0.185102299
2	41. Juul-Kristensen et al 2019	RCT	Rotator cuff - subacromial impingement	Disability	DASH- work	Multiple exercise types	Proprioception	Flexibility, Proprioception, Resistance	Movement pattern retraining	Movement pattern retraining, static, concentric and eccentric	23	42.9	12.4	51	25.3	3.9	Unsupervised	Home	Low risk	Low risk	Low risk	Low risk	Low risk	Unclear	Low risk	8	Short	2161	977	0.223706897	0.167404291
2	41. Juul-Kristensen et al 2019	RCT	Rotator cuff - subacromial impingement	Disability	DASH- sport	Multiple exercise types	Proprioception	Flexibility, Proprioception, Resistance	Movement pattern retraining	Movement pattern retraining, static, concentric and eccentric	23	42.9	12.4	51	25.3	3.9	Unsupervised	Home	Low risk	Low risk	Low risk	Low risk	Low risk	Unclear	Low risk	8	Short	2162	978	0.593596059	0.188988847
2	41. Juul-Kristensen et al 2019	RCT	Rotator cuff - subacromial impingement	Disability	OSS	Multiple exercise types	Proprioception	Flexibility, Proprioception, Resistance	Movement pattern retraining	Movement pattern retraining, static, concentric and eccentric	23	42.9	12.4	51	25.3	3.9	Unsupervised	Home	Low risk	Low risk	Low risk	Low risk	Low risk	Unclear	Low risk	8	Short	2163	979	0.554520037	0.185944036
2	96. Stevens et al 2014	RCT	Achilles	Disability	VISA-A	Exercise only	Resistance	Resistance	Eccentric only	Eccentric only	13	48.7	10.8	60.7	30.6	5.7	Unsupervised	Home	Unclear	Unclear	High risk	High risk	Unclear	Unclear	High risk	3	Short	2164	980	0.546099291	0.252897958
2	96. Stevens et al 2014	RCT	Achilles	Disability	VISA-A	Exercise only	Resistance	Resistance	Eccentric only	Eccentric only	13	48.7	10.8	60.7	30.6	5.7	Unsupervised	Home	Unclear	Unclear	High risk	Unclear	Unclear	Unclear	High risk	6	Short	2164	981	0.924168031	0.304457082
2	96. Stevens et al 2014	RCT	Achilles	Pain	VAS- pain intensity	Exercise only	Resistance	Resistance	Eccentric only	Eccentric only	13	48.7	10.8	60.7	30.6	5.7	Unsupervised	Home	Low risk	Low risk	Low risk	Low risk	Low risk	Unclear	High risk	3	Short	2165	982	0.44773358	0.242700365
2	96. Stevens et al 2014	RCT	Achilles	Pain	VAS- pain intensity	Exercise only	Resistance	Resistance	Eccentric only	Eccentric only	13	48.7	10.8	60.7	30.6	5.7	Unsupervised	Home	Low risk	Low risk	Low risk	Low risk	Low risk	Unclear	High risk	6	Short	2165	983	1.2160037	0.353529804
2	56. Mafi et al 2001	RCT	Achilles	Pain	VAS- activity	Exercise only	Resistance	Resistance	Concentric only	Concentric only	22	48.25	8.8	45.45	NA	NA	Unsupervised	Home	Low risk	Unclear	Unclear	Unclear	Unclear	Unclear	High risk	12	Short	2166	984	2.875241284	0.499630481
2	64. Norregaard et al 2007	RCT	Achilles	Disability	KOOS- pain	Exercise only	Flexibility	Flexibility	Static	Static	17	42	2	49	NA	NA	Unsupervised	Home	Low risk	Low risk	Unclear	Unclear	Unclear	Unclear	High risk	1	Short	2167	985	2.222222222	0.466210338
2	64. Norregaard et al 2007	RCT	Achilles	Disability	KOOS- pain	Exercise only	Flexibility	Flexibility	Static	Static	16	42	2	49	NA	NA	Unsupervised	Home	Low risk	Low risk	Unclear	Unclear	Unclear	Unclear	High risk	3	Short	2167	986	2.056497175	0.453858299
2	64. Norregaard et al 2007	RCT	Achilles	Disability	KOOS- pain	Exercise only	Flexibility	Flexibility	Static	Static	14	42	2	49	NA	NA	Unsupervised	Home	Low risk	Low risk	Unclear	Unclear	Unclear	Unclear	High risk	6	Short	2167	987	2.039215686	0.48966361
2	64. Norregaard et al 2007	RCT	Achilles	Disability	KOOS- pain	Exercise only	Flexibility	Flexibility	Static	Static	17	42	2	49	NA	NA	Unsupervised	Home	Low risk	Low risk	Unclear	Unclear	Unclear	Unclear	High risk	12	Short	2167	988	1.904761905	0.411574718
2	64. Norregaard et al 2007	RCT	Achilles	Disability	KOOS- pain	Exercise only	Flexibility	Flexibility	Static	Static	7	42	2	49	NA	NA	Unsupervised	Home	Low risk	Low risk	Unclear	Unclear	Unclear	Unclear	High risk	52	Medium	2167	989	1.304347826	0.570580778
2	64. Norregaard et al 2007	RCT	Achilles	Disability	KOOS- stiffness	Exercise only	Flexibility	Flexibility	Static	Static	17	42	2	49	NA	NA	Unsupervised	Home	Low risk	Low risk	Unclear	Unclear	Unclear	Unclear	High risk	1	Short	2168	990	1.904761905	0.411574718
2	64. Norregaard et al 2007	RCT	Achilles	Disability	KOOS- stiffness	Exercise only	Flexibility	Flexibility	Static	Static	16	42	2	49	NA	NA	Unsupervised	Home	Low risk	Low risk	Unclear	Unclear	Unclear	Unclear	High risk	3	Short	2168	991	2.003766478	0.444446531
2	64. Norregaard et al 2007	RCT	Achilles	Disability	KOOS- stiffness	Exercise only	Flexibility	Flexibility	Static	Static	14	42	2	49	NA	NA	Unsupervised	Home	Low risk	Low risk	Unclear	Unclear	Unclear	Unclear	High risk	6	Short	2168	992	1.673202614	0.419623257
2	64. Norregaard et al 2007	RCT	Achilles	Disability	KOOS- stiffness	Exercise only	Flexibility	Flexibility	Static	Static	17	42	2	49	NA	NA	Unsupervised	Home	Low risk	Low risk	Unclear	Unclear	Unclear	Unclear	High risk	12	Short	2168	993	1.481481481	0.341945192
2	64. Norregaard et al 2007	RCT	Achilles	Disability	KOOS- stiffness	Exercise only	Flexibility	Flexibility	Static	Static	7	42	2	49	NA	NA	Unsupervised	Home	Low risk	Low risk	Unclear	Unclear	Unclear	Unclear	High risk	52	Medium	2168	994	1.256038647	0.555842861
2	64. Norregaard et al 2007	RCT	Achilles	Disability	KOOS- QoL	Exercise only	Flexibility	Flexibility	Static	Static	17	42	2	49	NA	NA	Unsupervised	Home	Low risk	Low risk	Unclear	Unclear	Unclear	Unclear	High risk	1	Short	2169	995	3.265306122	0.653359041
2	64. Norregaard et al 2007	RCT	Achilles	Disability	KOOS- QoL	Exercise only	Flexibility	Flexibility	Static	Static	16	42	2	49	NA	NA	Unsupervised	Home	Low risk	Low risk	Unclear	Unclear	Unclear	Unclear	High risk	3	Short	2169	996	2.983050847	0.624802526
2	64. Norregaard et al 2007	RCT	Achilles	Disability	KOOS- QoL	Exercise only	Flexibility	Flexibility	Static	Static	14	42	2	49	NA	NA	Unsupervised	Home	Low risk	Low risk	Unclear	Unclear	Unclear	Unclear	High risk	6	Short	2169	997	2.957983193	0.674509735
2	64. Norregaard et al 2007	RCT	Achilles	Disability	KOOS- QoL	Exercise only	Flexibility	Flexibility	Static	Static	17	42	2	49	NA	NA	Unsupervised	Home	Low risk	Low risk	Unclear	Unclear	Unclear	Unclear	High risk	12	Short	2169	998	2.721088435	0.554636958
2	64. Norregaard et al 2007	RCT	Achilles	Disability	KOOS- QoL	Exercise only	Flexibility	Flexibility	Static	Static	7	42	2	49	NA	NA	Unsupervised	Home	Low risk	Low risk	Unclear	Unclear	Unclear	Unclear	High risk	52	Medium	2169	999	1.863354037	0.750484202
2	113. Young et al 2005	RCT	Patellar	Disability	VISA	Exercise only	Resistance	Resistance	Concentric and eccentric	concentric and eccentric	8	27.3	1.8	23.5	NA	NA	NA	NA	Unclear	Unclear	High risk	Low risk	High risk	Unclear	High risk	12	Short	2170	1000	0.897689769	0.410514334
2	113. Young et al 2005	RCT	Patellar	Disability	VISA	Exercise only	Resistance	Resistance	Concentric and eccentric	concentric and eccentric	8	27.3	1.8	23.5	NA	NA	NA	NA	Low risk	Unclear	Unclear	Low risk	Low risk	Unclear	Low risk	52.14291429	Medium	2170	1001	1.97139714	0.70398423
2	113. Young et al 2005	RCT	Patellar	Pain	VAS- activity	Exercise only	Resistance	Resistance	Concentric and eccentric	concentric and eccentric	8	27.3	1.8	23.5	NA	NA	NA	NA	Low risk	Unclear	Unclear	Low risk	Low risk	Unclear	Low risk	12	Short	2171	1002	1.513804714	0.571199739
2	113. Young et al 2005	RCT	Patellar	Pain	VAS- activity	Exercise only	Resistance	Resistance	Concentric and eccentric	concentric and eccentric	8	27.3	1.8	23.5	NA	NA	NA	NA	Low risk	Unclear	Unclear	Low risk	Low risk	Unclear	Low risk	52.14291429	Medium	2171	1003	1.336026936	0.521994331
2	88. Silbernagel et al 2007	RCT	Achilles	Disability	VISA-A	Multiple exercise types	Resistance	Flexibility, Plyometric, Resistance	Concentric and eccentric	dynamic, concentric and eccentric, eccentric only, plyometric	19	46	8	47.4	NA	NA	Unsupervised	Home	Low risk	Low risk	High risk	High risk	Low risk	Unclear	Low risk	6	Short	2172	1004	0.788019255	0.228954722
2	88. Silbernagel et al 2007	RCT	Achilles	Disability	VISA-A	Multiple exercise types	Resistance	Flexibility, Plyometric, Resistance	Concentric and eccentric	dynamic, concentric and eccentric, eccentric only, plyometric	19	46	8	47.4	NA	NA	Unsupervised	Home	Low risk	Low risk	High risk	High risk	Low risk	Unclear	Low risk	13.03572857	Medium	2172	1005	1.030486718	0.25788115
2	88. Silbernagel et al 2007	RCT	Achilles	Disability	VISA-A	Multiple exercise types	Resistance	Flexibility, Plyometric, Resistance	Concentric and eccentric	dynamic, concentric and eccentric, eccentric only, plyometric	19	46	8	47.4	NA	NA	Unsupervised	Home	Low risk	Low risk	High risk	High risk	Low risk	Unclear	Low risk	26.07145714	Medium	2172	1006	1.394187912	0.307680895
2	88. Silbernagel et al 2007	RCT	Achilles	Disability	VISA-A	Multiple exercise types	Resistance	Flexibility, Plyometric, Resistance	Concentric and eccentric	dynamic, concentric and eccentric, eccentric only, plyometric	19	46	8	47.4	NA	NA	Unsupervised	Home	Low risk	Low risk	High risk	High risk	Low risk	Unclear	Low risk	52.14291429	Medium	2172	1007	1.697272241	0.352976885
2	88. Silbernagel et al 2007	RCT	Achilles	Pain	VAS- hopping	Multiple exercise types	Resistance	Flexibility, Plyometric, Resistance	Concentric and eccentric	dynamic, concentric and eccentric, eccentric only, plyometric	19	46	8	47.4	NA	NA	Unsupervised	Home	Low risk	Low risk	High risk	High risk	Low risk	Unclear	Low risk	6	Short	2173	1008	0.498028169	0.201268959
2	88. Silbernagel et al 2007	RCT	Achilles	Pain	VAS- hopping	Multiple exercise types	Resistance	Flexibility, Plyometric, Resistance	Concentric and eccentric	dynamic, concentric and eccentric, eccentric only, plyometric	19	46	8	47.4	NA	NA	Unsupervised	Home	Low risk	Low risk	High risk	High risk	Low risk	Unclear	Low risk	13.03572857	Medium	2173	1009	0.842816901	0.235105179
2	88. Silbernagel et al 2007	RCT	Achilles	Pain	VAS- hopping	Multiple exercise types	Resistance	Flexibility, Plyometric, Resistance	Concentric and eccentric	dynamic, concentric and eccentric, eccentric only, plyometric	19	46	8	47.4	NA	NA	Unsupervised	Home	Low risk	Low risk	High risk	High risk	Low risk	Unclear	Low risk	26.07145714	Medium	2173	1010	1.034366197	0.25837672
2	88. Silbernagel et al 2007	RCT	Achilles	Pain	VAS- hopping	Multiple exercise types	Resistance	Flexibility, Plyometric, Resistance	Concentric and eccentric	dynamic, concentric and eccentric, eccentric only, plyometric	19	46	8	47.4	NA	NA	Unsupervised	Home	Low risk	Low risk	High risk	High risk	Low risk	Unclear	Low risk	52.14291429	Medium	2173	1011	1.149295775	0.273448261
2	88. Silbernagel et al 2007	RCT	Achilles	Physical function capacity	Endurance- toe raise	Multiple exercise types	Resistance	Flexibility, Plyometric, Resistance	Concentric and eccentric	dynamic, concentric and eccentric, eccentric only, plyometric	19	46	8	47.4	NA	NA	Unsupervised	Home	Low risk	Low risk	High risk	High risk	Low risk	Unclear	Low risk	6	Short	2174	1012	0.526658892	0.203583346
2	88. Silbernagel et al 2007	RCT	Achilles	Physical function capacity	Endurance- toe raise	Multiple exercise types	Resistance	Flexibility, Plyometric, Resistance	Concentric and eccentric	dynamic, concentric and eccentric, eccentric only, plyometric	19	46	8	47.4	NA	NA	Unsupervised	Home	Low risk	Low risk	High risk	High risk	Low risk	Unclear	Low risk	13.03572857	Medium	2174	1013	0.55512694	0.205984843
2	88. Silbernagel et al 2007	RCT	Achilles	Physical function capacity	Endurance- toe raise	Multiple exercise types	Resistance	Flexibility, Plyometric, Resistance	Concentric and eccentric	dynamic, concentric and eccentric, eccentric only, plyometric	19	46	8	47.4	NA	NA	Unsupervised	Home	Low risk	Low risk	High risk	High risk	Low risk	Unclear	Low risk	26.07145714	Medium	2174	1014	0.571394396	0.207400679
2	88. Silbernagel et al 2007	RCT	Achilles	Physical function capacity	Endurance- toe raise	Multiple exercise types	Resistance	Flexibility, Plyometric, Resistance	Concentric and eccentric	dynamic, concentric and eccentric, eccentric only, plyometric	19	46	8	47.4	NA	NA	Unsupervised	Home	Low risk	Low risk	High risk	High risk	Low risk	Unclear	Low risk	52.14291429	Medium	2174	1015	0.530725756	0.203920378
2	88. Silbernagel et al 2007	RCT	Achilles	Physical function capacity	Power- ecc conc toe raise	Multiple exercise types	Resistance	Flexibility, Plyometric, Resistance	Concentric and eccentric	dynamic, concentric and eccentric, eccentric only, plyometric	19	46	8	47.4	NA	NA	Unsupervised	Home	Low risk	Low risk	High risk	High risk	Low risk	Unclear	Low risk	6	Short	2175	1016	0.281243014	0.187386627
2	88. Silbernagel et al 2007	RCT	Achilles	Physical function capacity	Power- ecc conc toe raise	Multiple exercise types	Resistance	Flexibility, Plyometric, Resistance	Concentric and eccentric	dynamic, concentric and eccentric, eccentric only, plyometric	19	46	8	47.4	NA	NA	Unsupervised	Home	Low risk	Low risk	High risk	High risk	Low risk	Unclear	Low risk	13.03572857	Medium	2175	1017	0.608093002	0.210707143
2	88. Silbernagel et al 2007	RCT	Achilles	Physical function capacity	Power- ecc conc toe raise	Multiple exercise types	Resistance	Flexibility, Plyometric, Resistance	Concentric and eccentric	dynamic, concentric and eccentric, eccentric only, plyometric	19	46	8	47.4	NA	NA	Unsupervised	Home	Low risk	Low risk	High risk	High risk	Low risk	Unclear	Low risk	26.07145714	Medium	2175	1018	0.585289515	0.208634511
2	88. Silbernagel et al 2007	RCT	Achilles	Physical function capacity	Power- ecc conc toe raise	Multiple exercise types	Resistance	Flexibility, Plyometric, Resistance	Concentric and eccentric	dynamic, concentric and eccentric, eccentric only, plyometric	19	46	8	47.4	NA	NA	Unsupervised	Home	Low risk	Low risk	High risk	High risk	Low risk	Unclear	Low risk	52.14291429	Medium	2175	1019	0.402861614	0.19434761
2	88. Silbernagel et al 2007	RCT	Achilles	Physical function capacity	Power- conc toe raise	Multiple exercise types	Resistance	Flexibility, Plyometric, Resistance	Concentric and eccentric	dynamic, concentric and eccentric, eccentric only, plyometric	19	46	8	47.4	NA	NA	Unsupervised	Home	Low risk	Low risk	High risk	High risk	Low risk	Unclear	Low risk	6	Short	2176	1020	0.255399061	0.186200966
2	88. Silbernagel et al 2007	RCT	Achilles	Physical function capacity	Power- conc toe raise	Multiple exercise types	Resistance	Flexibility, Plyometric, Resistance	Concentric and eccentric	dynamic, concentric and eccentric, eccentric only, plyometric	19	46	8	47.4	NA	NA	Unsupervised	Home	Low risk	Low risk	High risk	High risk	Low risk	Unclear	Low risk	13.03572857	Medium	2176	1021	0.180907668	0.183392411
2	88. Silbernagel et al 2007	RCT	Achilles	Physical function capacity	Power- conc toe raise	Multiple exercise types	Resistance	Flexibility, Plyometric, Resistance	Concentric and eccentric	dynamic, concentric and eccentric, eccentric only, plyometric	19	46	8	47.4	NA	NA	Unsupervised	Home	Low risk	Low risk	High risk	High risk	Low risk	Unclear	Low risk	26.07145714	Medium	2176	1022	0.234115806	0.185305298
2	88. Silbernagel et al 2007	RCT	Achilles	Physical function capacity	Power- conc toe raise	Multiple exercise types	Resistance	Flexibility, Plyometric, Resistance	Concentric and eccentric	dynamic, concentric and eccentric, eccentric only, plyometric	19	46	8	47.4	NA	NA	Unsupervised	Home	Low risk	Low risk	High risk	High risk	Low risk	Unclear	Low risk	52.14291429	Medium	2176	1023	0.021283255	0.180560202
2	88. Silbernagel et al 2007	RCT	Achilles	Physical function capacity	Drop counter movement jump (height)	Multiple exercise types	Resistance	Flexibility, Plyometric, Resistance	Concentric and eccentric	dynamic, concentric and eccentric, eccentric only, plyometric	19	46	8	47.4	NA	NA	Unsupervised	Home	Low risk	Low risk	High risk	High risk	Low risk	Unclear	Low risk	6	Short	2177	1024	-0.052825345	0.180766819
2	88. Silbernagel et al 2007	RCT	Achilles	Physical function capacity	Drop counter movement jump (height)	Multiple exercise types	Resistance	Flexibility, Plyometric, Resistance	Concentric and eccentric	dynamic, concentric and eccentric, eccentric only, plyometric	19	46	8	47.4	NA	NA	Unsupervised	Home	Low risk	Low risk	High risk	High risk	Low risk	Unclear	Low risk	13.03572857	Medium	2177	1025	0.091870166	0.181265222
2	88. Silbernagel et al 2007	RCT	Achilles	Physical function capacity	Drop counter movement jump (height)	Multiple exercise types	Resistance	Flexibility, Plyometric, Resistance	Concentric and eccentric	dynamic, concentric and eccentric, eccentric only, plyometric	19	46	8	47.4	NA	NA	Unsupervised	Home	Low risk	Low risk	High risk	High risk	Low risk	Unclear	Low risk	26.07145714	Medium	2177	1026	0.261829973	0.186486016
2	88. Silbernagel et al 2007	RCT	Achilles	Physical function capacity	Drop counter movement jump (height)	Multiple exercise types	Resistance	Flexibility, Plyometric, Resistance	Concentric and eccentric	dynamic, concentric and eccentric, eccentric only, plyometric	19	46	8	47.4	NA	NA	Unsupervised	Home	Low risk	Low risk	High risk	High risk	Low risk	Unclear	Low risk	52.14291429	Medium	2177	1027	0.245752694	0.185785903
2	88. Silbernagel et al 2007	RCT	Achilles	Physical function capacity	Hopping (proportion)	Multiple exercise types	Resistance	Flexibility, Plyometric, Resistance	Concentric and eccentric	dynamic, concentric and eccentric, eccentric only, plyometric	19	46	8	47.4	NA	NA	Unsupervised	Home	Low risk	Low risk	High risk	High risk	Low risk	Unclear	Low risk	6	Short	2178	1028	0.23943662	0.18552231
2	88. Silbernagel et al 2007	RCT	Achilles	Physical function capacity	Hopping (proportion)	Multiple exercise types	Resistance	Flexibility, Plyometric, Resistance	Concentric and eccentric	dynamic, concentric and eccentric, eccentric only, plyometric	19	46	8	47.4	NA	NA	Unsupervised	Home	Low risk	Low risk	High risk	High risk	Low risk	Unclear	Low risk	13.03572857	Medium	2178	1029	0.309859155	0.188822623
2	88. Silbernagel et al 2007	RCT	Achilles	Physical function capacity	Hopping (proportion)	Multiple exercise types	Resistance	Flexibility, Plyometric, Resistance	Concentric and eccentric	dynamic, concentric and eccentric, eccentric only, plyometric	19	46	8	47.4	NA	NA	Unsupervised	Home	Low risk	Low risk	High risk	High risk	Low risk	Unclear	Low risk	26.07145714	Medium	2178	1030	0.767605634	0.226729001
2	88. Silbernagel et al 2007	RCT	Achilles	Physical function capacity	Hopping (proportion)	Multiple exercise types	Resistance	Flexibility, Plyometric, Resistance	Concentric and eccentric	dynamic, concentric and eccentric, eccentric only, plyometric	19	46	8	47.4	NA	NA	Unsupervised	Home	Low risk	Low risk	High risk	High risk	Low risk	Unclear	Low risk	52.14291429	Medium	2178	1031	0.507042254	0.2019865
2	88. Silbernagel et al 2007	RCT	Achilles	Physical function capacity	Counter movement jump (height)	Multiple exercise types	Resistance	Flexibility, Plyometric, Resistance	Concentric and eccentric	dynamic, concentric and eccentric, eccentric only, plyometric	19	46	8	47.4	NA	NA	Unsupervised	Home	Low risk	Low risk	High risk	High risk	Low risk	Unclear	Low risk	6	Short	2179	1032	0.007850381	0.180525587
2	88. Silbernagel et al 2007	RCT	Achilles	Physical function capacity	Counter movement jump (height)	Multiple exercise types	Resistance	Flexibility, Plyometric, Resistance	Concentric and eccentric	dynamic, concentric and eccentric, eccentric only, plyometric	19	46	8	47.4	NA	NA	Unsupervised	Home	Low risk	Low risk	High risk	High risk	Low risk	Unclear	Low risk	13.03572857	Medium	2179	1033	-0.00392519	0.180521498
2	88. Silbernagel et al 2007	RCT	Achilles	Physical function capacity	Counter movement jump (height)	Multiple exercise types	Resistance	Flexibility, Plyometric, Resistance	Concentric and eccentric	dynamic, concentric and eccentric, eccentric only, plyometric	19	46	8	47.4	NA	NA	Unsupervised	Home	Low risk	Low risk	High risk	High risk	Low risk	Unclear	Low risk	26.07145714	Medium	2179	1034	0.017663357	0.180547732
2	88. Silbernagel et al 2007	RCT	Achilles	Physical function capacity	Counter movement jump (height)	Multiple exercise types	Resistance	Flexibility, Plyometric, Resistance	Concentric and eccentric	dynamic, concentric and eccentric, eccentric only, plyometric	19	46	8	47.4	NA	NA	Unsupervised	Home	Low risk	Low risk	High risk	High risk	Low risk	Unclear	Low risk	52.14291429	Medium	2179	1035	0.027476333	0.180586907
2	2. Akkaya et al 2016	RCT	Rotator cuff - subacromial impingement	Pain	VAS- night pain	Exercise only	Flexibility	Flexibility	Dynamic	dynamic	16	41.7	8.9	67.6	26.9	4.5	Unsupervised	Home	Low risk	Unclear	High risk	High risk	Low risk	Unclear	Low risk	4	Short	2180	1036	0.547588005	0.225436798
2	2. Akkaya et al 2016	RCT	Rotator cuff - subacromial impingement	Pain	VAS- activity	Exercise only	Flexibility	Flexibility	Dynamic	dynamic	16	41.7	8.9	67.6	26.9	4.5	Unsupervised	Home	Low risk	Unclear	High risk	High risk	Low risk	Unclear	Low risk	4	Short	2181	1037	0.949152542	0.2730498
2	2. Akkaya et al 2016	RCT	Rotator cuff - subacromial impingement	Pain	VAS- rest	Exercise only	Flexibility	Flexibility	Dynamic	dynamic	16	41.7	8.9	67.6	26.9	4.5	Unsupervised	Home	Low risk	Unclear	High risk	High risk	Low risk	Unclear	Low risk	4	Short	2182	1038	0.531525424	0.223913536
2	2. Akkaya et al 2016	RCT	Rotator cuff - subacromial impingement	Disability	Constant score	Exercise only	Flexibility	Flexibility	Dynamic	dynamic	16	41.7	8.9	67.6	26.9	4.5	Unsupervised	Home	Low risk	Unclear	High risk	High risk	Low risk	Unclear	Low risk	4	Short	2183	1039	0	0.197435663
2	2. Akkaya et al 2016	RCT	Rotator cuff - subacromial impingement	Disability	SPADI	Exercise only	Flexibility	Flexibility	Dynamic	dynamic	16	41.7	8.9	67.6	26.9	4.5	Unsupervised	Home	Low risk	Unclear	High risk	High risk	Low risk	Unclear	Low risk	4	Short	2184	1040	0.619012528	0.232620151
2	1. Aceituno-G�mez et al 2019	Quasi-experimental	Rotator cuff - subacromial impingement	Pain	VAS- pain	Multiple exercise types	Flexibility	Flexibility, Resistance	Dynamic	Dynamic, Concentric and eccentric	22	59	8.925	60.9	NA	NA	NA	NA	Low risk	Unclear	Low risk	Low risk	Low risk	Low risk	High risk	3.258932143	Short	2185	1041	1.180231129	0.255630088
2	1. Aceituno-G�mez et al 2019	Quasi-experimental	Rotator cuff - subacromial impingement	Pain	VAS- pain	Multiple exercise types	Flexibility	Flexibility, Resistance	Dynamic	Dynamic, Concentric and eccentric	22	59	8.925	60.9	NA	NA	NA	NA	Low risk	Unclear	Low risk	Low risk	Low risk	Low risk	High risk	4.345242857	Short	2185	1042	1.180231129	0.255630088
2	1. Aceituno-G�mez et al 2019	Quasi-experimental	Rotator cuff - subacromial impingement	Pain	VAS- pain	Multiple exercise types	Flexibility	Flexibility, Resistance	Dynamic	Dynamic, Concentric and eccentric	22	59	8.925	60.9	NA	NA	NA	NA	Low risk	Unclear	Low risk	Low risk	Low risk	Low risk	High risk	13.03572857	Medium	2185	1043	2.360462257	0.421159538
2	1. Aceituno-G�mez et al 2019	Quasi-experimental	Rotator cuff - subacromial impingement	Physical function capacity	PPT- algometer	Multiple exercise types	Flexibility	Flexibility, Resistance	Dynamic	Dynamic, Concentric and eccentric	22	59	8.925	60.9	NA	NA	NA	NA	Low risk	Unclear	Low risk	Low risk	Low risk	Low risk	High risk	3.258932143	Short	2186	1044	0.974685258	0.231240809
2	1. Aceituno-G�mez et al 2019	Quasi-experimental	Rotator cuff - subacromial impingement	Physical function capacity	PPT- algometer	Multiple exercise types	Flexibility	Flexibility, Resistance	Dynamic	Dynamic, Concentric and eccentric	22	59	8.925	60.9	NA	NA	NA	NA	Low risk	Unclear	Low risk	Low risk	Low risk	Low risk	High risk	4.345242857	Short	2186	1045	1.191281982	0.257000623
2	1. Aceituno-G�mez et al 2019	Quasi-experimental	Rotator cuff - subacromial impingement	Physical function capacity	PPT- algometer	Multiple exercise types	Flexibility	Flexibility, Resistance	Dynamic	Dynamic, Concentric and eccentric	22	59	8.925	60.9	NA	NA	NA	NA	Low risk	Unclear	Low risk	Low risk	Low risk	Low risk	High risk	13.03572857	Medium	2186	1046	2.057668878	0.376179971
2	1. Aceituno-G�mez et al 2019	Quasi-experimental	Rotator cuff - subacromial impingement	Disability	SPADI	Multiple exercise types	Flexibility	Flexibility, Resistance	Dynamic	Dynamic, Concentric and eccentric	22	59	8.925	60.9	NA	NA	NA	NA	Low risk	Unclear	Low risk	Low risk	Low risk	Low risk	High risk	3.258932143	Short	2187	1047	1.010154154	0.235286287
2	1. Aceituno-G�mez et al 2019	Quasi-experimental	Rotator cuff - subacromial impingement	Disability	SPADI	Multiple exercise types	Flexibility	Flexibility, Resistance	Dynamic	Dynamic, Concentric and eccentric	22	59	8.925	60.9	NA	NA	NA	NA	Low risk	Unclear	Low risk	Low risk	Low risk	Low risk	High risk	4.345242857	Short	2187	1048	0.996124235	0.233677194
2	1. Aceituno-G�mez et al 2019	Quasi-experimental	Rotator cuff - subacromial impingement	Disability	SPADI	Multiple exercise types	Flexibility	Flexibility, Resistance	Dynamic	Dynamic, Concentric and eccentric	22	59	8.925	60.9	NA	NA	NA	NA	Low risk	Unclear	Low risk	Low risk	Low risk	Low risk	High risk	13.03572857	Medium	2187	1049	1.440404997	0.289180542
2	1. Aceituno-G�mez et al 2019	Quasi-experimental	Rotator cuff - subacromial impingement	Disability	Constant-murley score	Multiple exercise types	Flexibility	Flexibility, Resistance	Dynamic	Dynamic, Concentric and eccentric	22	59	8.925	60.9	NA	NA	NA	NA	Low risk	Unclear	Low risk	Low risk	Low risk	Low risk	High risk	3.258932143	Short	2188	1050	1.085380985	0.244101929
2	1. Aceituno-G�mez et al 2019	Quasi-experimental	Rotator cuff - subacromial impingement	Disability	Constant-murley score	Multiple exercise types	Flexibility	Flexibility, Resistance	Dynamic	Dynamic, Concentric and eccentric	22	59	8.925	60.9	NA	NA	NA	NA	Low risk	Unclear	Low risk	Low risk	Low risk	Low risk	High risk	4.345242857	Short	2188	1051	1.419344365	0.286375202
2	1. Aceituno-G�mez et al 2019	Quasi-experimental	Rotator cuff - subacromial impingement	Disability	Constant-murley score	Multiple exercise types	Flexibility	Flexibility, Resistance	Dynamic	Dynamic, Concentric and eccentric	22	59	8.925	60.9	NA	NA	NA	NA	Low risk	Unclear	Low risk	Low risk	Low risk	Low risk	High risk	13.03572857	Medium	2188	1052	1.725477463	0.328359978
2	1. Aceituno-G�mez et al 2019	Quasi-experimental	Rotator cuff - subacromial impingement	Disability	QuickDASH	Multiple exercise types	Flexibility	Flexibility, Resistance	Dynamic	Dynamic, Concentric and eccentric	22	59	8.925	60.9	NA	NA	NA	NA	Low risk	Unclear	Low risk	Low risk	Low risk	Low risk	High risk	3.258932143	Short	2189	1053	1.183787519	0.256070559
2	1. Aceituno-G�mez et al 2019	Quasi-experimental	Rotator cuff - subacromial impingement	Disability	QuickDASH	Multiple exercise types	Flexibility	Flexibility, Resistance	Dynamic	Dynamic, Concentric and eccentric	22	59	8.925	60.9	NA	NA	NA	NA	Low risk	Unclear	Low risk	Low risk	Low risk	Low risk	High risk	4.345242857	Short	2189	1054	1.291950846	0.269724005
2	1. Aceituno-G�mez et al 2019	Quasi-experimental	Rotator cuff - subacromial impingement	Disability	QuickDASH	Multiple exercise types	Flexibility	Flexibility, Resistance	Dynamic	Dynamic, Concentric and eccentric	22	59	8.925	60.9	NA	NA	NA	NA	Low risk	Unclear	Low risk	Low risk	Low risk	Low risk	High risk	13.03572857	Medium	2189	1055	1.760658594	0.333329033
2	78. Reyhan et al 2020	RCT	Lateral elbow/tennis elbow	Physical function capacity	Dynamometer- painfree grip strength	Multiple exercise types	Flexibility	Flexibility, Resistance	Dynamic	Dynamic, Static, Isometric	20	42.4	9.9	82.5	NA	NA	Unsupervised	Home	Low risk	Low risk	Unclear	Unclear	Low risk	Unclear	High risk	2.172621429	Short	2190	1056	0.101623844	0.176665704
2	78. Reyhan et al 2020	RCT	Lateral elbow/tennis elbow	Physical function capacity	Dynamometer- painfree grip strength	Multiple exercise types	Flexibility	Flexibility, Resistance	Dynamic	Dynamic, Static, Isometric	20	42.4	9.9	82.5	NA	NA	Unsupervised	Home	Low risk	Low risk	Unclear	Unclear	Low risk	Unclear	High risk	6.517864286	Short	2190	1057	0.17364851	0.17834245
2	78. Reyhan et al 2020	RCT	Lateral elbow/tennis elbow	Physical function capacity	Dynamometer- painfree grip strength	Multiple exercise types	Flexibility	Flexibility, Resistance	Dynamic	Dynamic, Static, Isometric	20	42.4	9.9	82.5	NA	NA	Unsupervised	Home	Low risk	Low risk	Unclear	Unclear	Low risk	Unclear	High risk	15.20835	Medium	2190	1058	0.101623844	0.176665704
2	78. Reyhan et al 2020	RCT	Lateral elbow/tennis elbow	Physical function capacity	Dynamometer- max grip strength	Multiple exercise types	Flexibility	Flexibility, Resistance	Dynamic	Dynamic, Static, Isometric	20	42.4	9.9	82.5	NA	NA	Unsupervised	Home	Low risk	Low risk	Unclear	Unclear	Low risk	Unclear	High risk	2.172621429	Short	2191	1059	0.044575311	0.175955567
2	78. Reyhan et al 2020	RCT	Lateral elbow/tennis elbow	Physical function capacity	Dynamometer- max grip strength	Multiple exercise types	Flexibility	Flexibility, Resistance	Dynamic	Dynamic, Static, Isometric	20	42.4	9.9	82.5	NA	NA	Unsupervised	Home	Low risk	Low risk	Unclear	Unclear	Low risk	Unclear	High risk	6.517864286	Short	2191	1060	0.103284258	0.176694612
2	78. Reyhan et al 2020	RCT	Lateral elbow/tennis elbow	Physical function capacity	Dynamometer- max grip strength	Multiple exercise types	Flexibility	Flexibility, Resistance	Dynamic	Dynamic, Static, Isometric	20	42.4	9.9	82.5	NA	NA	Unsupervised	Home	Low risk	Low risk	Unclear	Unclear	Low risk	Unclear	High risk	15.20835	Medium	2191	1061	0.120679502	0.177025294
2	24. Dejaco et al 2017	RCT	Rotator cuff - subacromial impingement	Disability	Constant-murley score	Multiple exercise types	Resistance	Flexibility, Resistance	Concentric and eccentric	Concentric and eccentric, Static	16	49.5	11.3	47.3	NA	NA	Unsupervised	Home	Low risk	Low risk	Low risk	Low risk	Low risk	High risk	Low risk	6	Short	2193	1062	0.66999003	0.238132249
2	24. Dejaco et al 2017	RCT	Rotator cuff - subacromial impingement	Disability	Constant-murley score	Multiple exercise types	Resistance	Flexibility, Resistance	Concentric and eccentric	Concentric and eccentric, Static	16	49.5	11.3	47.3	NA	NA	Unsupervised	Home	Low risk	Low risk	Low risk	Low risk	Low risk	High risk	Low risk	12	Short	2193	1063	0.971485543	0.276134067
2	24. Dejaco et al 2017	RCT	Rotator cuff - subacromial impingement	Disability	Constant-murley score	Multiple exercise types	Resistance	Flexibility, Resistance	Concentric and eccentric	Concentric and eccentric, Static	16	49.5	11.3	47.3	NA	NA	Unsupervised	Home	Low risk	Low risk	Low risk	Low risk	Low risk	High risk	Low risk	26	Medium	2193	1064	1.105483549	0.295364558
2	24. Dejaco et al 2017	RCT	Rotator cuff - subacromial impingement	Pain	VAS- activity	Multiple exercise types	Resistance	Flexibility, Resistance	Concentric and eccentric	Concentric and eccentric, Static	16	49.5	11.3	47.3	NA	NA	Unsupervised	Home	Low risk	Low risk	Low risk	Low risk	Low risk	High risk	Low risk	6	Short	2194	1065	0.594099184	0.23004058
2	24. Dejaco et al 2017	RCT	Rotator cuff - subacromial impingement	Pain	VAS- activity	Multiple exercise types	Resistance	Flexibility, Resistance	Concentric and eccentric	Concentric and eccentric, Static	16	49.5	11.3	47.3	NA	NA	Unsupervised	Home	Low risk	Low risk	Low risk	Low risk	Low risk	High risk	Low risk	12	Short	2194	1066	0.812052731	0.254992393
2	24. Dejaco et al 2017	RCT	Rotator cuff - subacromial impingement	Pain	VAS- activity	Multiple exercise types	Resistance	Flexibility, Resistance	Concentric and eccentric	Concentric and eccentric, Static	16	49.5	11.3	47.3	NA	NA	Unsupervised	Home	Low risk	Low risk	Low risk	Low risk	Low risk	High risk	Low risk	26	Medium	2194	1067	0.780414313	0.251060821
2	24. Dejaco et al 2017	RCT	Rotator cuff - subacromial impingement	Disability	Constant murley score	Multiple exercise types	Resistance	Flexibility, Resistance	Concentric and eccentric	Concentric and eccentric, Static	16	49.5	11.3	47.3	NA	NA	Unsupervised	Home	Low risk	Low risk	Low risk	Low risk	Low risk	High risk	Low risk	6	Short	2195	1068	0.267530234	0.20446802
2	24. Dejaco et al 2017	RCT	Rotator cuff - subacromial impingement	Disability	Constant murley score	Multiple exercise types	Resistance	Flexibility, Resistance	Concentric and eccentric	Concentric and eccentric, Static	16	49.5	11.3	47.3	NA	NA	Unsupervised	Home	Low risk	Low risk	Low risk	Low risk	Low risk	High risk	Low risk	12	Short	2195	1069	0.381756626	0.211508646
2	24. Dejaco et al 2017	RCT	Rotator cuff - subacromial impingement	Disability	Constant murley score	Multiple exercise types	Resistance	Flexibility, Resistance	Concentric and eccentric	Concentric and eccentric, Static	16	49.5	11.3	47.3	NA	NA	Unsupervised	Home	Low risk	Low risk	Low risk	Low risk	Low risk	High risk	Low risk	26	Medium	2195	1070	0.432857907	0.215359591
2	24. Dejaco et al 2017	RCT	Rotator cuff - subacromial impingement	Pain	VAS- Average pain during daily activities	Multiple exercise types	Resistance	Flexibility, Resistance	Concentric and eccentric	Concentric and eccentric, Static	16	49.5	11.3	47.3	NA	NA	Unsupervised	Home	Low risk	Low risk	Low risk	Low risk	Low risk	High risk	Low risk	6	Short	2196	1071	1.219851428	0.312637322
2	24. Dejaco et al 2017	RCT	Rotator cuff - subacromial impingement	Pain	VAS- Average pain during daily activities	Multiple exercise types	Resistance	Flexibility, Resistance	Concentric and eccentric	Concentric and eccentric, Static	16	49.5	11.3	47.3	NA	NA	Unsupervised	Home	Low risk	Low risk	Low risk	Low risk	Low risk	High risk	Low risk	12	Short	2196	1072	1.673576653	0.386761192
2	24. Dejaco et al 2017	RCT	Rotator cuff - subacromial impingement	Pain	VAS- Average pain during daily activities	Multiple exercise types	Resistance	Flexibility, Resistance	Concentric and eccentric	Concentric and eccentric, Static	16	49.5	11.3	47.3	NA	NA	Unsupervised	Home	Low risk	Low risk	Low risk	Low risk	Low risk	High risk	Low risk	26	Medium	2196	1073	1.606633587	0.37538369
2	24. Dejaco et al 2017	RCT	Rotator cuff - subacromial impingement	Physical function capacity	Isometric strength	Multiple exercise types	Resistance	Flexibility, Resistance	Concentric and eccentric	Concentric and eccentric, Static	16	49.5	11.3	47.3	NA	NA	Unsupervised	Home	Low risk	Low risk	Low risk	Low risk	Low risk	High risk	Low risk	6	Short	2197	1074	0.297222295	0.206080933
2	24. Dejaco et al 2017	RCT	Rotator cuff - subacromial impingement	Physical function capacity	Isometric strength	Multiple exercise types	Resistance	Flexibility, Resistance	Concentric and eccentric	Concentric and eccentric, Static	16	49.5	11.3	47.3	NA	NA	Unsupervised	Home	Low risk	Low risk	Low risk	Low risk	Low risk	High risk	Low risk	12	Short	2197	1075	0.333866139	0.208284796
2	24. Dejaco et al 2017	RCT	Rotator cuff - subacromial impingement	Physical function capacity	Isometric strength	Multiple exercise types	Resistance	Flexibility, Resistance	Concentric and eccentric	Concentric and eccentric, Static	16	49.5	11.3	47.3	NA	NA	Unsupervised	Home	Low risk	Low risk	Low risk	Low risk	Low risk	High risk	Low risk	26	Medium	2197	1076	0.565943821	0.227219934
2	24. Dejaco et al 2017	RCT	Rotator cuff - subacromial impingement	ROM - Shoulder	Goniometer- forward flexion	Multiple exercise types	Resistance	Flexibility, Resistance	Concentric and eccentric	Concentric and eccentric, Static	16	49.5	11.3	47.3	NA	NA	Unsupervised	Home	Low risk	Low risk	Low risk	Low risk	Low risk	High risk	Low risk	6	Short	2198	1077	0.087133098	0.198193464
2	24. Dejaco et al 2017	RCT	Rotator cuff - subacromial impingement	ROM - Shoulder	Goniometer- forward flexion	Multiple exercise types	Resistance	Flexibility, Resistance	Concentric and eccentric	Concentric and eccentric, Static	16	49.5	11.3	47.3	NA	NA	Unsupervised	Home	Low risk	Low risk	Low risk	Low risk	Low risk	High risk	Low risk	12	Short	2198	1078	0.197282482	0.201290267
2	24. Dejaco et al 2017	RCT	Rotator cuff - subacromial impingement	ROM - Shoulder	Goniometer- forward flexion	Multiple exercise types	Resistance	Flexibility, Resistance	Concentric and eccentric	Concentric and eccentric, Static	16	49.5	11.3	47.3	NA	NA	Unsupervised	Home	Low risk	Low risk	Low risk	Low risk	Low risk	High risk	Low risk	26	Medium	2198	1079	0.141385778	0.199424737
2	92. Stasinopoulos et al 2010	Quasi-experimental	Lateral elbow/tennis elbow	Function	VAS- function over 24hr (0-10 full function)	Multiple exercise types	Resistance	Flexibility, Resistance	Eccentric only	Eccentric Only, Static	35	45.05	5.8	52.8	NA	NA	Supervised	Clinic	Not applicable (quasi)	Not applicable (quasi)	Low risk	Low risk	Low risk	Unclear	High risk	12	Short	2200	1080	4.565035502	0.588837914
2	92. Stasinopoulos et al 2010	Quasi-experimental	Lateral elbow/tennis elbow	Function	VAS- function over 24hr (0-10 full function)	Multiple exercise types	Resistance	Flexibility, Resistance	Eccentric only	Eccentric Only, Static	35	45.05	5.8	52.8	NA	NA	Supervised	Clinic	Not applicable (quasi)	Not applicable (quasi)	Low risk	Low risk	Low risk	Unclear	High risk	24	Medium	2200	1081	4.913891927	0.631652952
2	89. Silbernagel et al 2001	RCT	Achilles	Physical function capacity	Jumping test- plantarflexion	Multiple exercise types	Resistance	Flexibility, Resistance	Concentric and eccentric	Concentric and eccentric, Static	22	44	12.45	22.5	NA	NA	Unsupervised	Home	Unclear	Unclear	Unclear	Unclear	Unclear	Unclear	High risk	6	Short	2202	1082	0	0.167343569
2	89. Silbernagel et al 2001	RCT	Achilles	Physical function capacity	Jumping test- plantarflexion	Multiple exercise types	Resistance	Flexibility, Resistance	Concentric and eccentric	Concentric and eccentric, Static	24	44	12.45	22.5	NA	NA	Unsupervised	Home	Unclear	Unclear	Unclear	Unclear	Unclear	Unclear	High risk	13.03572857	Medium	2202	1083	-0.146520147	0.161632988
2	89. Silbernagel et al 2001	RCT	Achilles	Physical function capacity	Jumping test- plantarflexion	Multiple exercise types	Resistance	Flexibility, Resistance	Concentric and eccentric	Concentric and eccentric, Static	25	44	12.45	22.5	NA	NA	Unsupervised	Home	Unclear	Unclear	Unclear	Unclear	Unclear	Unclear	High risk	26.07145714	Medium	2202	1084	0.146730463	0.158277046
2	89. Silbernagel et al 2001	RCT	Achilles	Physical function capacity	Jumping test- SL counter movement jump	Multiple exercise types	Resistance	Flexibility, Resistance	Concentric and eccentric	Concentric and eccentric, Static	26	44	12.45	22.5	NA	NA	Unsupervised	Home	Unclear	Unclear	Unclear	Unclear	Unclear	Unclear	High risk	6	Short	2203	1085	0.269360269	0.15870832
2	89. Silbernagel et al 2001	RCT	Achilles	Physical function capacity	Jumping test- SL counter movement jump	Multiple exercise types	Resistance	Flexibility, Resistance	Concentric and eccentric	Concentric and eccentric, Static	26	44	12.45	22.5	NA	NA	Unsupervised	Home	Unclear	Unclear	Unclear	Unclear	Unclear	Unclear	High risk	13.03572857	Medium	2203	1086	0.269360269	0.15870832
2	89. Silbernagel et al 2001	RCT	Achilles	Physical function capacity	Jumping test- SL counter movement jump	Multiple exercise types	Resistance	Flexibility, Resistance	Concentric and eccentric	Concentric and eccentric, Static	17	44	12.45	22.5	NA	NA	Unsupervised	Home	Unclear	Unclear	Unclear	Unclear	Unclear	Unclear	High risk	26.07145714	Medium	2203	1087	0.529100529	0.21641065
2	89. Silbernagel et al 2001	RCT	Achilles	Physical function capacity	Toe raise test- no.	Multiple exercise types	Resistance	Flexibility, Resistance	Concentric and eccentric	Concentric and eccentric, Static	26	44	12.45	22.5	NA	NA	Unsupervised	Home	Unclear	Unclear	Unclear	Unclear	Unclear	Unclear	High risk	6	Short	2204	1088	0.26446281	0.158526368
2	89. Silbernagel et al 2001	RCT	Achilles	Physical function capacity	Toe raise test- no.	Multiple exercise types	Resistance	Flexibility, Resistance	Concentric and eccentric	Concentric and eccentric, Static	26	44	12.45	22.5	NA	NA	Unsupervised	Home	Unclear	Unclear	Unclear	Unclear	Unclear	Unclear	High risk	13.03572857	Medium	2204	1089	0.52892562	0.172520019
2	89. Silbernagel et al 2001	RCT	Achilles	Physical function capacity	Toe raise test- no.	Multiple exercise types	Resistance	Flexibility, Resistance	Concentric and eccentric	Concentric and eccentric, Static	24	44	12.45	22.5	NA	NA	Unsupervised	Home	Unclear	Unclear	Unclear	Unclear	Unclear	Unclear	High risk	26.07145714	Medium	2204	1090	0.43956044	0.174023047
2	48. Knobloch et al 2008	RCT	Achilles	Pain	VAS- pain	Exercise only	Resistance	Resistance	Eccentric only	Eccentric only	49	47.5	11	35	26.5	4.5	Unsupervised	Home	Unclear	Low risk	Unclear	Unclear	Unclear	Unclear	High risk	12	Short	2205	1091	0.84367988	0.142048168
2	48. Knobloch et al 2008	RCT	Achilles	Disability	FAOS- pain	Exercise only	Resistance	Resistance	Eccentric only	Eccentric only	49	47.5	11	35	26.5	4.5	Unsupervised	Home	Unclear	Low risk	Unclear	Unclear	Unclear	Unclear	High risk	12	Short	2207	1092	0.621658859	0.128892254
2	48. Knobloch et al 2008	RCT	Achilles	QoL	FAOS- quality of life	Exercise only	Resistance	Resistance	Eccentric only	Eccentric only	49	47.5	11	35	26.5	4.5	Unsupervised	Home	Unclear	Low risk	Unclear	Unclear	Unclear	Unclear	High risk	12	Short	2209	1093	0.492146597	0.122608137
2	10. Bang et al 2000	RCT	Rotator cuff - subacromial impingement	Physical function capacity	Dynamometer- abduction strength	Multiple exercise types	Flexibility	Flexibility, Resistance	Static	Static, Concentric and eccentric, Isometric	27	43	9.1	42.3	NA	NA	Supervised	Clinic	Low risk	Unclear	Unclear	Low risk	Low risk	Unclear	Low risk	3	Short	2210	1094	0.289415365	0.15640749
2	10. Bang et al 2000	RCT	Rotator cuff - subacromial impingement	Physical function capacity	Dynamometer- ext rotation	Multiple exercise types	Flexibility	Flexibility, Resistance	Static	Static, Concentric and eccentric, Isometric	27	43	9.1	42.3	NA	NA	Supervised	Clinic	Low risk	Unclear	Unclear	Low risk	Low risk	Unclear	Low risk	3	Short	2211	1095	0.776866819	0.188292168
2	10. Bang et al 2000	RCT	Rotator cuff - subacromial impingement	Physical function capacity	Dynamometer- int rotation	Multiple exercise types	Flexibility	Flexibility, Resistance	Static	Static, Concentric and eccentric, Isometric	27	43	9.1	42.3	NA	NA	Supervised	Clinic	Low risk	Unclear	Unclear	Low risk	Low risk	Unclear	Low risk	3	Short	2212	1096	0.257752124	0.155231936
2	10. Bang et al 2000	RCT	Rotator cuff - subacromial impingement	Physical function capacity	Strength composite score	Multiple exercise types	Flexibility	Flexibility, Resistance	Static	Static, Concentric and eccentric, Isometric	27	43	9.1	42.3	NA	NA	Supervised	Clinic	Low risk	Unclear	Unclear	Low risk	Low risk	Unclear	Low risk	3	Short	2213	1097	0.396352416	0.161288536
2	10. Bang et al 2000	RCT	Rotator cuff - subacromial impingement	Pain	VAS- abduction AROM pain	Multiple exercise types	Flexibility	Flexibility, Resistance	Static	Static, Concentric and eccentric, Isometric	27	43	9.1	42.3	NA	NA	Supervised	Clinic	Low risk	Unclear	Unclear	Low risk	Low risk	Unclear	Low risk	3	Short	2214	1098	1.302785824	0.242036069
2	10. Bang et al 2000	RCT	Rotator cuff - subacromial impingement	Pain	VAS- resisted abduction pain	Multiple exercise types	Flexibility	Flexibility, Resistance	Static	Static, Concentric and eccentric, Isometric	27	43	9.1	42.3	NA	NA	Supervised	Clinic	Low risk	Unclear	Unclear	Low risk	Low risk	Unclear	Low risk	3	Short	2215	1099	0.732853116	0.18452331
2	10. Bang et al 2000	RCT	Rotator cuff - subacromial impingement	Pain	VAS- resisted ext rotation pain	Multiple exercise types	Flexibility	Flexibility, Resistance	Static	Static, Concentric and eccentric, Isometric	27	43	9.1	42.3	NA	NA	Supervised	Clinic	Low risk	Unclear	Unclear	Low risk	Low risk	Unclear	Low risk	3	Short	2216	1100	0.85799583	0.195598002
2	10. Bang et al 2000	RCT	Rotator cuff - subacromial impingement	Pain	VAS- resisted int rotation pain	Multiple exercise types	Flexibility	Flexibility, Resistance	Static	Static, Concentric and eccentric, Isometric	27	43	9.1	42.3	NA	NA	Supervised	Clinic	Low risk	Unclear	Unclear	Low risk	Low risk	Unclear	Low risk	3	Short	2217	1101	0.741302211	0.185235596
2	10. Bang et al 2000	RCT	Rotator cuff - subacromial impingement	Pain	VAS- Functional pain	Multiple exercise types	Flexibility	Flexibility, Resistance	Static	Static, Concentric and eccentric, Isometric	27	43	9.1	42.3	NA	NA	Supervised	Clinic	Low risk	Unclear	Unclear	Low risk	Low risk	Unclear	Low risk	3	Short	2218	1102	1.735304669	0.293883308
2	10. Bang et al 2000	RCT	Rotator cuff - subacromial impingement	Pain	Pain composite score	Multiple exercise types	Flexibility	Flexibility, Resistance	Static	Static, Concentric and eccentric, Isometric	27	43	9.1	42.3	NA	NA	Supervised	Clinic	Low risk	Unclear	Unclear	Low risk	Low risk	Unclear	Low risk	3	Short	2219	1103	1.771579876	0.298424847
2	10. Bang et al 2000	RCT	Rotator cuff - subacromial impingement	Function	Functional assessment questionnaire	Multiple exercise types	Flexibility	Flexibility, Resistance	Static	Static, Concentric and eccentric, Isometric	27	43	9.1	42.3	NA	NA	Supervised	Clinic	Low risk	Unclear	Unclear	Low risk	Low risk	Unclear	Low risk	3	Short	2220	1104	2.021461421	0.330301971
2	114. Yu et al 2013	Quasi-experimental	Achilles	Pain	VAS	Multiple exercise types	Resistance	Flexibility, Resistance	Concentric only	Concentric only, Static	16	30.34	1.555	0	21.6	NA	NA	NA	Low risk	Low risk	Low risk	Unclear	Low risk	Unclear	Unclear	8	Short	2221	1105	2.955588929	0.619627357
2	114. Yu et al 2013	Quasi-experimental	Achilles	Physical function capacity	Peak torque knee extension	Multiple exercise types	Resistance	Flexibility, Resistance	Concentric only	Concentric only, Static	16	30.34	1.555	0	21.6	NA	NA	NA	Low risk	Low risk	Low risk	Unclear	Low risk	Unclear	Unclear	8	Short	2222	1106	0.803312316	0.253896781
2	114. Yu et al 2013	Quasi-experimental	Achilles	Physical function capacity	Peak torque knee flexion	Multiple exercise types	Resistance	Flexibility, Resistance	Concentric only	Concentric only, Static	16	30.34	1.555	0	21.6	NA	NA	NA	Low risk	Low risk	Low risk	Unclear	Low risk	Unclear	Unclear	8	Short	2223	1107	0.294908406	0.20594962
2	114. Yu et al 2013	Quasi-experimental	Achilles	Physical function capacity	Peak torque ankle plantarflexion	Multiple exercise types	Resistance	Flexibility, Resistance	Concentric only	Concentric only, Static	16	30.34	1.555	0	21.6	NA	NA	NA	Low risk	Low risk	Low risk	Unclear	Low risk	Unclear	Unclear	8	Short	2224	1108	1.195062522	0.308833541
2	114. Yu et al 2013	Quasi-experimental	Achilles	Physical function capacity	Peak torque ankle dorsiflexion	Multiple exercise types	Resistance	Flexibility, Resistance	Concentric only	Concentric only, Static	16	30.34	1.555	0	21.6	NA	NA	NA	Low risk	Low risk	Low risk	Unclear	Low risk	Unclear	Unclear	8	Short	2225	1109	0.576126692	0.228228261
2	114. Yu et al 2013	Quasi-experimental	Achilles	Physical function capacity	Endurance of knee extension	Multiple exercise types	Resistance	Flexibility, Resistance	Concentric only	Concentric only, Static	16	30.34	1.555	0	21.6	NA	NA	NA	Low risk	Low risk	Low risk	Unclear	Low risk	Unclear	Unclear	8	Short	2226	1110	-0.027831206	0.197513109
2	114. Yu et al 2013	Quasi-experimental	Achilles	Physical function capacity	Endurance of knee flexion	Multiple exercise types	Resistance	Flexibility, Resistance	Concentric only	Concentric only, Static	16	30.34	1.555	0	21.6	NA	NA	NA	Low risk	Low risk	Low risk	Unclear	Low risk	Unclear	Unclear	8	Short	2227	1111	0.046318644	0.197650099
2	114. Yu et al 2013	Quasi-experimental	Achilles	Physical function capacity	Endurance of ankle plantarflexion	Multiple exercise types	Resistance	Flexibility, Resistance	Concentric only	Concentric only, Static	16	30.34	1.555	0	21.6	NA	NA	NA	Low risk	Low risk	Low risk	Unclear	Low risk	Unclear	Unclear	8	Short	2228	1112	1.001540832	0.280342151
2	114. Yu et al 2013	Quasi-experimental	Achilles	Physical function capacity	Endurance of ankle dorsiflexion	Multiple exercise types	Resistance	Flexibility, Resistance	Concentric only	Concentric only, Static	16	30.34	1.555	0	21.6	NA	NA	NA	Low risk	Low risk	Low risk	Unclear	Low risk	Unclear	Unclear	8	Short	2229	1113	1.947553566	0.434467019
2	114. Yu et al 2013	Quasi-experimental	Achilles	Physical function capacity	Total balance index	Multiple exercise types	Resistance	Flexibility, Resistance	Concentric only	Concentric only, Static	16	30.34	1.555	0	21.6	NA	NA	NA	Low risk	Low risk	Low risk	Unclear	Low risk	Unclear	Unclear	8	Short	2230	1114	0.385111831	0.211748702
2	114. Yu et al 2013	Quasi-experimental	Achilles	Physical function capacity	Anterior posterior balance index	Multiple exercise types	Resistance	Flexibility, Resistance	Concentric only	Concentric only, Static	16	30.34	1.555	0	21.6	NA	NA	NA	Low risk	Low risk	Low risk	Unclear	Low risk	Unclear	Unclear	8	Short	2231	1115	0.417393378	0.214150699
2	114. Yu et al 2013	Quasi-experimental	Achilles	Physical function capacity	Medial lateral balance index	Multiple exercise types	Resistance	Flexibility, Resistance	Concentric only	Concentric only, Static	16	30.34	1.555	0	21.6	NA	NA	NA	Low risk	Low risk	Low risk	Unclear	Low risk	Unclear	Unclear	8	Short	2232	1116	1.021715171	0.283202369
2	114. Yu et al 2013	Quasi-experimental	Achilles	Physical function capacity	Dexterity	Multiple exercise types	Resistance	Flexibility, Resistance	Concentric only	Concentric only, Static	16	30.34	1.555	0	21.6	NA	NA	NA	Low risk	Low risk	Low risk	Unclear	Low risk	Unclear	Unclear	8	Short	2233	1117	2.649825865	0.56236693
2	114. Yu et al 2013	Quasi-experimental	Achilles	Physical function capacity	Agility	Multiple exercise types	Resistance	Flexibility, Resistance	Concentric only	Concentric only, Static	16	30.34	1.555	0	21.6	NA	NA	NA	Low risk	Low risk	Low risk	Unclear	Low risk	Unclear	Unclear	8	Short	2234	1118	1.990158557	0.442025481
2	69. Pearson et al 2012	RCT	Achilles	Disability	VISA-A	Exercise only	Resistance	Resistance	Eccentric only	Eccentric only	20	50	8.2	62.5	NA	NA	NA	NA	Unclear	Unclear	High risk	Unclear	Low risk	Unclear	High risk	6	Short	2235	1119	0.33408	0.185071919
2	69. Pearson et al 2012	RCT	Achilles	Disability	VISA-A	Exercise only	Resistance	Resistance	Eccentric only	Eccentric only	20	50	8.2	62.5	NA	NA	NA	NA	Unclear	Unclear	High risk	Unclear	Low risk	Unclear	High risk	12	Short	2235	1120	0.36096	0.186581176
2	79. Rio et al 2017	RCT	Patellar	Pain	Change in pain during SLDS (NRS)	Exercise only	Resistance	Resistance	Isometric	Isometric	10	22.5	4.7	10	NA	NA	Unsupervised	NA	Low risk	Low risk	Low risk	Low risk	Low risk	Low risk	High risk	1	Short	2236	1121	0.786883366	0.332822169
2	79. Rio et al 2017	RCT	Patellar	Pain	Change in pain during SLDS (NRS)	Exercise only	Resistance	Resistance	Isometric	Isometric	10	22.5	4.7	10	NA	NA	Unsupervised	NA	Low risk	Low risk	Low risk	Low risk	Low risk	Low risk	High risk	2	Short	2236	1122	0.379685057	0.274338225
2	79. Rio et al 2017	RCT	Patellar	Pain	Change in pain during SLDS (NRS)	Exercise only	Resistance	Resistance	Isometric	Isometric	10	22.5	4.7	10	NA	NA	Unsupervised	NA	Low risk	Low risk	Low risk	Low risk	Low risk	Low risk	High risk	3	Short	2236	1123	0.602543563	0.302695501
2	79. Rio et al 2017	RCT	Patellar	Pain	Change in pain during SLDS (NRS)	Exercise only	Resistance	Resistance	Isometric	Isometric	10	22.5	4.7	10	NA	NA	Unsupervised	NA	Low risk	Low risk	Low risk	Low risk	Low risk	Low risk	High risk	4	Short	2236	1124	0.676829981	0.314211744
2	79. Rio et al 2017	RCT	Patellar	Disability	VISA-P	Exercise only	Resistance	Resistance	Isometric	Isometric	10	22.5	4.7	10	NA	NA	Unsupervised	NA	Low risk	Low risk	Low risk	Low risk	Low risk	Low risk	High risk	4	Short	2237	1125	0.519799487	0.291002641
2	39. Jonsson et al 2005	RCT	Patellar	Pain	VAS- activity	Exercise only	Resistance	Resistance	Concentric only	Concentric only	7	24.9	8.15	13.33333333	24.2	NA	NA	NA	Unclear	Unclear	Low risk	Unclear	High risk	Unclear	High risk	12	Short	2238	1126	0.330015715	0.334418797
2	39. Jonsson et al 2005	RCT	Patellar	Disability	VISA	Exercise only	Resistance	Resistance	Concentric only	Concentric only	7	24.9	8.15	13.33333333	24.2	NA	NA	NA	Unclear	Unclear	Low risk	Unclear	High risk	Unclear	High risk	12	Short	2239	1127	-0.19738597	0.320074478
2	26. Dimitrios et al 2012	Quasi-experimental	Patellar	Disability	VISA-P	Exercise only	Resistance	Resistance	Eccentric only	Eccentric only	21	26.71	4.715	27.90697674	NA	NA	Unsupervised	NA	Not applicable (quasi)	Not applicable (quasi)	Low risk	Low risk	Low risk	Unclear	High risk	4	Short	2240	1128	0.853408916	0.22362956
2	26. Dimitrios et al 2012	Quasi-experimental	Patellar	Disability	VISA-P	Exercise only	Resistance	Resistance	Eccentric only	Eccentric only	21	26.71	4.715	27.90697674	NA	NA	Unsupervised	NA	Not applicable (quasi)	Not applicable (quasi)	Low risk	Low risk	Low risk	Unclear	High risk	24	Medium	2240	1129	0.944845585	0.233811026
2	100. Turgut et al 2017	RCT	Rotator cuff - subacromial impingement	Disability	SPADI- pain	Multiple exercise types	Resistance	Flexibility, Resistance	Concentric and eccentric	Concentric and eccentric, Static	15	36.45	17.5	46.66666667	24.75	2.925	Unsupervised	NA	Low risk	Unclear	Unclear	Unclear	High risk	Unclear	Low risk	6	Short	2241	1130	0.898765432	0.276297071
2	100. Turgut et al 2017	RCT	Rotator cuff - subacromial impingement	Disability	SPADI- pain	Multiple exercise types	Resistance	Flexibility, Resistance	Concentric and eccentric	Concentric and eccentric, Static	15	36.45	17.5	46.66666667	24.75	2.925	Unsupervised	NA	Low risk	Unclear	Unclear	Unclear	High risk	Unclear	Low risk	12	Short	2241	1131	1.106531987	0.30691869
2	100. Turgut et al 2017	RCT	Rotator cuff - subacromial impingement	Function	SPADI- disability	Multiple exercise types	Resistance	Flexibility, Resistance	Concentric and eccentric	Concentric and eccentric, Static	15	36.45	17.5	46.66666667	24.75	2.925	Unsupervised	NA	Low risk	Unclear	Unclear	Unclear	High risk	Unclear	Low risk	6	Short	2242	1132	0.718973709	0.252730134
2	100. Turgut et al 2017	RCT	Rotator cuff - subacromial impingement	Function	SPADI- disability	Multiple exercise types	Resistance	Flexibility, Resistance	Concentric and eccentric	Concentric and eccentric, Static	15	36.45	17.5	46.66666667	24.75	2.925	Unsupervised	NA	Low risk	Unclear	Unclear	Unclear	High risk	Unclear	Low risk	12	Short	2242	1133	0.912511878	0.278221767
2	100. Turgut et al 2017	RCT	Rotator cuff - subacromial impingement	Disability	SPADI	Multiple exercise types	Resistance	Flexibility, Resistance	Concentric and eccentric	Concentric and eccentric, Static	15	36.45	17.5	46.66666667	24.75	2.925	Unsupervised	NA	Low risk	Unclear	Unclear	Unclear	High risk	Unclear	Low risk	6	Short	2243	1134	0.795434731	0.262366153
2	100. Turgut et al 2017	RCT	Rotator cuff - subacromial impingement	Disability	SPADI	Multiple exercise types	Resistance	Flexibility, Resistance	Concentric and eccentric	Concentric and eccentric, Static	15	36.45	17.5	46.66666667	24.75	2.925	Unsupervised	NA	Low risk	Unclear	Unclear	Unclear	High risk	Unclear	Low risk	12	Short	2243	1135	1.033240865	0.295764634
2	100. Turgut et al 2017	RCT	Rotator cuff - subacromial impingement	Pain	VAS- rest	Multiple exercise types	Resistance	Flexibility, Resistance	Concentric and eccentric	Concentric and eccentric, Static	15	36.45	17.5	46.66666667	24.75	2.925	Unsupervised	NA	Low risk	Unclear	Unclear	Unclear	High risk	Unclear	Low risk	12	Short	2244	1136	0.329476584	0.215331847
2	100. Turgut et al 2017	RCT	Rotator cuff - subacromial impingement	Pain	VAS- activity	Multiple exercise types	Resistance	Flexibility, Resistance	Concentric and eccentric	Concentric and eccentric, Static	15	36.45	17.5	46.66666667	24.75	2.925	Unsupervised	NA	Low risk	Unclear	Unclear	Unclear	High risk	Unclear	Low risk	6	Short	2245	1137	0.935968379	0.281542058
2	100. Turgut et al 2017	RCT	Rotator cuff - subacromial impingement	Pain	VAS- activity	Multiple exercise types	Resistance	Flexibility, Resistance	Concentric and eccentric	Concentric and eccentric, Static	15	36.45	17.5	46.66666667	24.75	2.925	Unsupervised	NA	Low risk	Unclear	Unclear	Unclear	High risk	Unclear	Low risk	12	Short	2245	1138	1.283794466	0.335203878
2	100. Turgut et al 2017	RCT	Rotator cuff - subacromial impingement	Pain	VAS- night pain	Multiple exercise types	Resistance	Flexibility, Resistance	Concentric and eccentric	Concentric and eccentric, Static	15	36.45	17.5	46.66666667	24.75	2.925	Unsupervised	NA	Low risk	Unclear	Unclear	Unclear	High risk	Unclear	Low risk	6	Short	2246	1139	0.467099567	0.225980033
2	100. Turgut et al 2017	RCT	Rotator cuff - subacromial impingement	Pain	VAS- night pain	Multiple exercise types	Resistance	Flexibility, Resistance	Concentric and eccentric	Concentric and eccentric, Static	15	36.45	17.5	46.66666667	24.75	2.925	Unsupervised	NA	Low risk	Unclear	Unclear	Unclear	High risk	Unclear	Low risk	12	Short	2246	1140	0.492424242	0.228273036
2	33. Granviken et al 2015	RCT	Rotator cuff - subacromial impingement	Disability	SPADI	Multiple exercise types	Proprioception	Flexibility, Proprioception, Resistance	Movement pattern retraining	Movement pattern retraining, Concentric and eccentric, Static, Dynamic	23	47.9	9.9	48	NA	NA	Supervised	NA	Low risk	Low risk	Low risk	Low risk	Low risk	Low risk	Low risk	6	Short	2247	1141	0.813067151	0.208740247
2	33. Granviken et al 2015	RCT	Rotator cuff - subacromial impingement	Disability	SPADI	Multiple exercise types	Proprioception	Flexibility, Proprioception, Resistance	Movement pattern retraining	Movement pattern retraining, Concentric and eccentric, Static, Dynamic	21	47.9	9.9	48	NA	NA	Supervised	NA	Low risk	Low risk	Low risk	Low risk	Low risk	Low risk	Low risk	26	Medium	2247	1142	1.367088608	0.286912241
[truncated: 274 more rows]
